# Supplementary material
Source: publisher figshare collection journal article supplement (https://acs.figshare.com/ndownloader/files/5718867)

## Supporting Information

## Enantioselective Total Synthesis of Epothilone A and B Using Multifunctional Asymmetric Catalysis

Daisuke Sawada, Motomu Kanai, and Masakatsu Shibasaki\*

**General.** Optical rotations were measured on a JASCO P-1010 polarimeter. Infrared (IR) spectra were recorded on a Perkin Elmer 1600 diffraction grating infrared spectrophotometer or a JASCO FT/IR-410 diffraction grating infrared spectrophotometer.  $^1\text{H}$  NMR and  $^{13}\text{C}$  NMR spectra were recorded on a JEOL JMN-LA500 spectrometer and measured with  $\text{CDCl}_3$  or  $\text{C}_6\text{D}_6$  as solvents. Chemical shifts are reported in ppm on the  $\delta$  scale relative to TMS ( $\delta = 0.00$  for  $^1\text{H}$  NMR) or using residual  $\text{CHCl}_3$  ( $\delta = 7.26$  for  $^1\text{H}$  NMR and  $\delta = 77.0$  for  $^{13}\text{C}$  NMR) or benzene ( $\delta = 7.20$  for  $^1\text{H}$  NMR and  $\delta = 128.0$  for  $^{13}\text{C}$  NMR) as an internal reference, respectively. EI-Mass spectra were measured on a JEOL JMS-BU20 instruments. All solvents used in the reactions were dried prior to use. All reagents were purified by standard methods. All experiments were performed under anhydrous conditions in an atmosphere of Ar, unless otherwise mentioned, and monitored with analytical TLC (Merck Art. No. 5715, silica gel 60- $\text{F}_{254}$  plate). Flash column chromatography were carried out on Merck Art. No.9385, Silica gel 60 or on Wako, Aluminium Oxide (about 300 mesh ASTM). High performance liquid chromatography (HPLC) was carried out on a JASCO HPLC system consisting of the following equipments: pump, PU-980 intelligent HPLC pump; detector, UNIDEC-100IV or UV-970.

**3-Benzoyloxy-2,2-dimethyl-1-propanol (30):** To a solution of neopentyl glycol **12** (550 mg, 5.28 mmol) in benzene (30 mL) were added benzaldehyde (644  $\mu\text{L}$ , 6.34 mmol) and  $\text{TsOH}\cdot\text{H}_2\text{O}$  (100 mg, 0.53 mmol), and then the mixture was heated at azeotropically reflux using Dean-Stark apparatus. After 5 h saturated aqueous  $\text{NaHCO}_3$  (100 mL) was added to the mixture followed by the addition of  $\text{AcOEt}$  (100 mL). The organic layer was separated, and the aqueous phase was further extracted twice with  $\text{AcOEt}$  (100 mL). The combined organic layers were washed with brine, dried ( $\text{Na}_2\text{SO}_4$ ), and concentrated to give a residue which was purified by silica gel flash chromatography ( $\text{AcOEt}$ /hexane, 1 : 50) to give acetal (914 mg, 4.75 mmol; 90%) as a colorless oil: IR (neat) 2952, 2857, 1455, 1384, 1104, 1025, 744  $\text{cm}^{-1}$ ;  $^1\text{H}$  NMR (500 MHz,  $\text{CDCl}_3$ )  $\delta$  7.52 (m, 2H), 7.36 (m, 3H), 5.40 (s, 1H), 3.79 (d,  $J = 11.0$  Hz, 2H), 3.66 (d,  $J = 11.0$  Hz, 2H), 1.31 (s, 3H), 0.81 (s, 3H);  $^{13}\text{C}$  NMR (125 MHz,  $\text{CDCl}_3$ )  $\delta$  138.9, 129.2, 128.6, 126.5, 102.1, 78.0, 30.6, 23.4, 22.2; EI-MS  $m/z$  192 ( $\text{M}^+$ ); EI-HRMS Calcd for  $\text{C}_{12}\text{H}_{16}\text{O}_2$  ( $\text{M}^+$ ): 192.1150, Found : 192.1150.

To a solution of acetal (895 mg, 4.66 mmol) in  $\text{CH}_2\text{Cl}_2$  (30 mL) was added DIBAL (12.25 mL, 0.95 M solution in hexane, 12.25 mmol) at 0 °C and the mixture was stirred at room temperature for 9 h. Saturated aqueous Rochelle salt solution (150 mL) and AcOEt (150 mL) were successively added, and the quenched mixture was stirred for 2 h. The organic layer was separated, and the aqueous phase was further extracted twice with AcOEt (150 mL). The combined organic layers were washed with brine, then dried ( $\text{Na}_2\text{SO}_4$ ), and concentrated to give a residue which was purified by silica gel flash chromatography (AcOEt/hexane, 1 : 5) to give alcohol **30** (850 mg, 4.38 mmol; 94%) as a colorless oil: IR (neat) 3427, 2956, 2870, 1454, 1362, 1101, 1049, 736, 697  $\text{cm}^{-1}$ ;  $^1\text{H}$  NMR (500 MHz,  $\text{CDCl}_3$ )  $\delta$  7.32 (m, 5H), 4.51 (s, 2H), 3.46 (d,  $J = 5.6$  Hz, 2H), 3.33 (s, 2H), 2.57 (m, 1H), 0.94 (s, 6H);  $^{13}\text{C}$  NMR (125 MHz,  $\text{CDCl}_3$ )  $\delta$  138.8, 129.0, 128.7, 128.1, 80.1, 74.1, 72.4, 36.8, 22.5; EI-MS  $m/z$  194 ( $\text{M}^+$ ); EI-HRMS Calcd for  $\text{C}_{12}\text{H}_{18}\text{O}_2$  ( $\text{M}^+$ ) : 194.1307, Found : 194.1307.

**3-Benzyloxy-2,2-dimethyl-1-propanal (31):** To a solution of alcohol **30** (838 mg, 4.31 mmol) in DMSO (10 mL) were added triethylamine (1.8 mL, 12.9 mmol), and then  $\text{SO}_3 \cdot \text{Py}$  complex (1.03 g, 6.47 mmol) at 0 °C. The mixture was stirred at room temperature for 1 h, and then poured into ice-water (40 mL). AcOEt (40 mL) was added to the mixture and the organic layer was separated, and the aqueous phase was further extracted twice with AcOEt (40 mL). The combined organic layers were washed with brine, dried ( $\text{Na}_2\text{SO}_4$ ), and concentrated to give a residue which was purified by silica gel flash chromatography (AcOEt/hexane, 1 : 20) to give aldehyde **31** (746 mg, 3.88 mmol; 90%) as a colorless oil: IR (neat) 2969, 2858, 1732, 1455, 1362, 1099, 1028, 739, 698  $\text{cm}^{-1}$ ;  $^1\text{H}$  NMR (500 MHz,  $\text{CDCl}_3$ )  $\delta$  9.57 (s, 1H), 7.30 (m, 5H), 4.51 (s, 2H), 3.46 (s, 2H), 1.10 (s, 6H);  $^{13}\text{C}$  NMR (125 MHz,  $\text{CDCl}_3$ )  $\delta$  205.9, 138.7, 129.0, 128.2, 128.0, 75.7, 74.0, 47.7, 19.6; EI-MS  $m/z$  192 ( $\text{M}^+$ ); EI-HRMS Calcd for  $\text{C}_{12}\text{H}_{16}\text{O}_2$  ( $\text{M}^+$ ) : 192.1150, Found : 192.1156.

**7-Benzyloxy-6,6-dimethyl-4-hepten-3-one (11):** To a solution of *N,N*-diisopropylamine (638  $\mu\text{L}$ , 4.55 mmol) in THF (20 mL) was added butyllithium (2.64 mL, 1.58 M hexane solution, 4.17 mmol) at -78 °C. The mixture was allowed to warm up to 0 °C, stirred for 40 min, and then cooled to -78 °C again. To the mixture was added 2-butanone (408  $\mu\text{L}$ , 4.55 mmol). After 1 h aldehyde **31** (729 mg, 3.79 mmol) in THF (2 mL) was added to the mixture and the whole mixture was stirred for 1 h. Saturated aqueous  $\text{NH}_4\text{Cl}$  (40 mL) was added to the mixture followed by the addition of AcOEt (40 mL). The organic layer was separated, and the aqueous phase was further extracted twice with AcOEt (40 mL). The combined organic layers were washed with brine, dried ( $\text{Na}_2\text{SO}_4$ ), and concentrated to give a residue which was used for the next step without further purification.

To a crude mixture of hydroxyketone in  $\text{CH}_2\text{Cl}_2$  (30 mL) were added TFAA (803  $\mu\text{L}$ , 5.69 mmol) and DBU (1.7 mL, 11.4 mmol) at 0 °C and the mixture was stirred at room temperature for 1 h. Saturated aqueous  $\text{NH}_4\text{Cl}$  (50 mL) was added to the mixture followed by the addition of AcOEt (50 mL). The organic layer was separated, and the aqueous phase was further extracted twice with AcOEt (50 mL). The combined organic layers were washed with brine, dried ( $\text{Na}_2\text{SO}_4$ ), and concentrated to give a residue which was purified by silica gel flash chromatography (AcOEt/hexane, 1 : 25) to give enone **11** (765 mg, 3.07 mmol; 81% in 2 steps) as a colorless oil: IR (neat) 2967, 2871, 1698, 1674, 1627, 1455, 1361, 1200, 1099, 1029, 982, 738, 698  $\text{cm}^{-1}$ ;  $^1\text{H}$  NMR (500 MHz,  $\text{CDCl}_3$ )  $\delta$  7.31 (m, 5H), 6.87 (d,  $J$  = 16.0 Hz, 1H), 6.07 (d,  $J$  = 16.0 Hz, 1H), 4.51 (s, 2H), 3.26 (s, 2H), 2.57 (q,  $J$  = 7.2 Hz, 2H), 1.10 (t,  $J$  = 7.2 Hz, 3H), 1.10 (s, 6H);  $^{13}\text{C}$  NMR (125 MHz,  $\text{CDCl}_3$ )  $\delta$  201.9, 153.7, 138.8, 128.7, 127.9, 127.8, 127.5, 78.7, 73.7, 38.5, 33.6, 24.3, 8.5; EI-MS  $m/z$  246 ( $\text{M}^+$ ); EI-HRMS Calcd for  $\text{C}_{16}\text{H}_{22}\text{O}_2$  ( $\text{M}^+$ ) : 246.1620, Found : 246.1624.

**7-Benzyloxy-4,5-trans-epoxy-6,6-dimethyl-3-heptanone, a mixture of (4S,5R) and (4R,5S) isomers, (10):** To a solution of enone **11** (5 g, 20.2 mmol) in MeOH (120 mL) were added 10% aqueous solution of NaOH (4 mL) and 30% aqueous solution of  $\text{H}_2\text{O}_2$  (11.5 mL) at 0 °C. The mixture was stirred for 13 h, and then saturated aqueous  $\text{NH}_4\text{Cl}$  (100 mL) and saturated aqueous  $\text{Na}_2\text{S}_2\text{O}_3$  (50 mL) were added to the mixture. The solvent was removed under reduced pressure, and then AcOEt (100 mL) was added. The organic layer was separated, and the aqueous phase was further extracted twice with AcOEt (100 mL). The combined organic layers were washed with brine, dried ( $\text{Na}_2\text{SO}_4$ ), and concentrated to give a residue which was purified by silica gel flash chromatography (AcOEt/hexane, 1 : 25) to give epoxyketone **10** (3.51 g, 13.4 mmol; 66%) as a colorless oil: IR (neat) 2972, 2875, 1712, 1455, 1362, 1100, 883, 739, 699  $\text{cm}^{-1}$ ;  $^1\text{H}$  NMR (500 MHz,  $\text{CDCl}_3$ )  $\delta$  7.32 (m, 5H), 4.51 (s, 2H), 3.40 (d,  $J$  = 2.2 Hz, 1H), 3.30 (d,  $J$  = 8.8 Hz, 1H), 3.24 (d,  $J$  = 8.8 Hz, 1H), 3.03 (d,  $J$  = 2.2 Hz, 1H), 2.44 (dq,  $J$  = 7.2, 17.9 Hz, 1H), 2.33 (dq,  $J$  = 7.2, 17.9 Hz, 1H), 1.04 (dd,  $J$  = 7.2, 7.2 Hz, 3H), 0.94 (s, 3H), 0.93 (s, 3H);  $^{13}\text{C}$  NMR (125 MHz,  $\text{CDCl}_3$ )  $\delta$  208.8, 138.7, 128.7, 127.9, 127.8, 77.2, 73.7, 63.8, 59.9, 36.0, 31.1, 21.2, 20.7, 7.4; EI-MS  $m/z$  262 ( $\text{M}^+$ ); EI-HRMS Calcd for  $\text{C}_{16}\text{H}_{22}\text{O}_3$  ( $\text{M}^+$ ) : 262.1569, Found : 262.1571.

**7-Benzyloxy-5-hydroxy-4,6,6-trimethyl-3-heptanone, a mixture of (4S,5R) and (4R,5S) isomers, (34):** To a solution of epoxy ketone **10** (2.60 g, 9.91 mmol) in MeOH (40 mL) were added sodium acetate (2.44 g, 2.97 mmol) and methoxylamine hydrochloride (1.24 g, 1.49 mmol) at 0 °C. The mixture was stirred for 1 h, then saturated aqueous  $\text{NH}_4\text{Cl}$  (50 mL) was added to the mixture. The solvent was removed under reduced pressure, and then AcOEt (50 mL) was added. The organic layer was separated, and the aqueous phase was further extracted twice with AcOEt (50 mL). The combined organic layers were washed with brine, then dried ( $\text{Na}_2\text{SO}_4$ ), and concentrated

to give a residue which was purified by silica gel flash chromatography (AcOEt/hexane, 1 : 40) to give epoxy oxime **32** (2.40 g, 8.23 mmol; 83%) as a colorless oil.

To a suspension of CuCN (3.7 g, 41.4 mmol) in Et<sub>2</sub>O (20 mL) was added MeLi (75 mL, 1.1 M Et<sub>2</sub>O solution, 82.7 mmol) at -78 °C, and then the mixture was warmed up to 0 °C and stirred for 20 min. The mixture was cooled to -78 °C again and epoxy oxime **32** (2.41 g, 8.27 mmol) in Et<sub>2</sub>O (2 mL) was added to the solution. After stirring for 20 h at the same temperature, saturated aqueous NH<sub>4</sub>Cl (30 mL) and aqueous NH<sub>3</sub> (30 mL) were added to the mixture. The organic layer was separated, and the aqueous phase was further extracted twice with AcOEt (50 mL). The combined organic layers were washed with brine, dried (Na<sub>2</sub>SO<sub>4</sub>), and concentrated to give a residue which was purified by silica gel flash chromatography (AcOEt/hexane, 1 : 20) to give hydroxyoxime **33** (1.53 g, 4.96 mmol; 60%) as a colorless oil.

Raney nickel (50% slurry in water, ca. 3 g, purchased from Aldrich) was washed with H<sub>2</sub>O then with MeOH, and suspended in MeOH (7 mL), H<sub>2</sub>O (1 mL) and acetone (1 mL). H<sub>3</sub>BO<sub>3</sub> (1.5 g, 23.8 mmol) was added to a mixture, which was stirred for 1 h. Hydroxyoxime **33** (1.22 g, 4.0 mmol) in THF (7 mL) was added and the whole mixture was stirred under H<sub>2</sub> for 2 h at room temperature. The mixture was filtered through celite and the solvents were removed under reduced pressure. H<sub>2</sub>O (30 mL) was added to the mixture followed by the addition of AcOEt (50 mL). The organic layer was separated, and the aqueous phase was further extracted twice with AcOEt (30 mL). The combined organic layers were washed with brine, dried (Na<sub>2</sub>SO<sub>4</sub>), and concentrated to give a residue which was purified by silica gel flash chromatography (AcOEt/hexane, 1 : 20) to give hydroxyketone **34** (862 mg, 3.1 mmol; 78%) as a colorless oil: IR (neat) 3461, 3030, 2971, 2936, 2875, 2360, 1693, 1455, 1411, 1378, 1259, 1207, 1102, 1050, 1027, 973, 801, 737, 698cm<sup>-1</sup>; <sup>1</sup>H NMR (500 MHz, CDCl<sub>3</sub>) δ 7.24 (m, 5H), 4.39 (s, 2H), 3.40 (d, J = 2.8 Hz, 1H), 3.21 (d, J = 9.0 Hz, 1H), 3.19 (d, J = 9.0 Hz, 1H), 2.83 (dq, J = 2.8, 6.7 Hz, 1H), 2.45 (dq, J = 7.2, 18.3 Hz, 1H), 2.40 (dq, J = 7.2, 18.3 Hz, 1H), 1.21 (d, J = 6.7 Hz), 0.91 (dd, J = 7.2, 7.2 Hz, 3H), 0.87 (s, 3H), 0.85 (s, 3H); <sup>13</sup>CNMR (125MHz, CDCl<sub>3</sub>) δ 218.8, 138.6, 128.6, 127.9, 127.8, 82.0, 77.5, 73.5, 44.6, 40.2, 36.2, 23.2, 21.8, 18.3, 7.6; EI-MS *m/z* 279 (M<sup>+</sup>); EI-HRMS Calcd for C<sub>17</sub>H<sub>27</sub>O<sub>3</sub> (M<sup>+</sup>) : 279.1960, Found : 279.1952.

**4-(1-Benzyloxy-2-methyl-2-propyl)-6-ethyl-2,2,5-trimethyl-1,3-dioxane, a mixture of (4*R*,5*R*,6*R*) and (4*S*,5*S*,6*S*) isomers, (35) and 4-(1-Benzyloxy-2-methyl-2-propyl)-6-ethyl-2,2,5-trimethyl-1,3-dioxane, a mixture of (4*R*,5*R*,6*S*) and (4*S*,5*S*,6*R*) isomers, (36):** To a solution of hydroxyketone **34** (18.4 mg, 0.066 mmol) in MeOH (1 mL) was added NaBH<sub>4</sub> (5.5 mg, 0.145 mmol) and the mixture was stirred for 2 h. A saturated aqueous NH<sub>4</sub>Cl (30 mL) was added to the mixture followed by the addition of AcOEt (30 mL). The organic layer was separated, and the

aqueous phase was further extracted twice with AcOEt (30 mL). The combined organic layers were washed with brine, then dried ( $\text{Na}_2\text{SO}_4$ ), and concentrated to give a residue which was purified by preparative thin-layer chromatography (silica gel, AcOEt/hexane, 1 : 3) to give diol (9.6 mg, 0.034 mmol; 52%) and the isomeric diol (6.9 mg, 0.025 mmol; 37%) as a colorless oil.

To a solution of diol (9.6 mg, 0.034 mmol) in DMF (1 mL) were added 2,2-dimethoxypropane (11  $\mu\text{L}$ , 0.0856 mmol) and small amounts of PPTS, and then the mixture was stirred for 24 h at 70 °C.  $\text{H}_2\text{O}$  (30 mL) was added to the mixture followed by the addition of AcOEt (30 mL). The organic layer was separated, and the aqueous phase was further extracted twice with AcOEt (30 mL). The combined organic layers were washed with brine, dried ( $\text{Na}_2\text{SO}_4$ ), and concentrated to give a residue which was purified by preparative thin-layer chromatography (silica gel, AcOEt/hexane, 1 : 3) to give acetone **35** (4.6 mg, 0.014 mmol; 42%) and diol (5.0 mg, 0.0178 mmol; 52%) as a colorless oil: IR (neat) 2929, 2855, 1454, 1378, 1203, 1100, 697  $\text{cm}^{-1}$ ;  $^1\text{H}$  NMR (500 MHz,  $\text{CDCl}_3$ )  $\delta$  7.34 (m, 5H), 4.48 (d,  $J$  = 12.2 Hz, 1H), 4.46 (d,  $J$  = 12.2 Hz, 1H), 3.51 (d,  $J$  = 9.6 Hz, 1H), 3.41 (d,  $J$  = 8.3 Hz, 1H), 3.33 (m, 1H), 3.13 (d,  $J$  = 8.3 Hz, 1H), 1.69 (m, 1H), 1.52 (m, 1H), 1.40 (m, 1H), 1.35 (s, 3H), 1.32 (s, 3H), 1.01 (s, 3H), 1.01 (s, 3H), 0.87 (d,  $J$  = 6.6 Hz, 3H);  $^{13}\text{C}$  NMR (125 MHz,  $\text{CDCl}_3$ )  $\delta$  139.5, 128.5, 127.7, 127.6, 97.5, 77.6, 77.2, 76.2, 73.5, 39.7, 34.1, 30.5, 26.8, 24.0, 21.3, 20.2, 15.3, 10.0; EI-MS  $m/z$  320 ( $\text{M}^+$ ), 305 ( $\text{M}^+ - \text{Me}$ ); EI-HRMS Calcd for  $\text{C}_{20}\text{H}_{32}\text{O}_3$  ( $\text{M}^+ - \text{Me}$ ): 305.2117, Found: 305.2118.

To a solution of the isomeric diol (6.8 mg, 0.024 mmol) in DMF (1 mL) were added 2,2-dimethoxypropane (7.5  $\mu\text{L}$ , 0.0606 mmol) and small amounts of PPTS, and then the mixture was stirred for 24 h at 70 °C.  $\text{H}_2\text{O}$  (30 mL) was added to the mixture followed by the addition of AcOEt (30 mL). The organic layer was separated, and the aqueous phase was further extracted twice with AcOEt (30 mL). The combined organic layers were washed with brine, dried ( $\text{Na}_2\text{SO}_4$ ), and concentrated to give a residue which was purified by preparative thin-layer chromatography (silica gel, AcOEt/hexane, 1 : 3) to give acetone **36** (5.7 mg, 0.0177 mmol; 73%) and the starting material (1.1 mg, 0.0039 mmol; 16%) as a colorless oil: IR (neat) 2964, 2869, 1462, 1378, 1227, 1091, 689  $\text{cm}^{-1}$ ;  $^1\text{H}$  NMR (500 MHz,  $\text{CDCl}_3$ )  $\delta$  7.33 (m, 5H), 4.49 (s, 2H), 3.57 (m, 1H), 3.31 (d,  $J$  = 8.3 Hz, 1H), 3.30 (d,  $J$  = 6.2 Hz, 1H), 3.19 (d,  $J$  = 8.3 Hz, 1H), 1.84 (m, 1H), 1.43 (m, 1H), 1.34 (m, 1H), 1.81 (s, 3H), 1.27 (s, 3H), 0.92 (s, 3H), 0.91 (s, 3H), 0.87 (d,  $J$  = 6.6 Hz, 3H);  $^{13}\text{C}$  NMR (125 MHz,  $\text{CDCl}_3$ )  $\delta$  139.4, 128.6, 127.7, 127.6, 100.1, 77.6, 77.2, 73.6, 71.7, 39.2, 34.4, 26.3, 24.1, 23.8, 21.5, 20.2, 13.7, 10.8; EI-MS  $m/z$  320 ( $\text{M}^+$ ); EI-HRMS Calcd for  $\text{C}_{20}\text{H}_{32}\text{O}_3$  ( $\text{M}^+$ ): 320.2351, Found: 320.2354.

**1-Benzyloxy-2,2,4,6-tetramethyl-8-nonen-3,5-diol**, a mixture of (3*R*,4*R*,5*S*,6*S*) and (3*S*,4*S*,5*R*,6*R*) isomers, (**38**) and **1-Benzyloxy-2,2,4,6-tetramethyl-8-nonen-3,5-diol**, a mixture

of **(3R,4R,5R,6S)** and **(3S,4S,5S,6R)** isomers, **(39)**: Tetramethylammonium triacetoxymethylborohydride (337 mg, 1.28 mmol) was dissolved in MeCN (3.5 mL) and AcOH (2 mL) and the mixture was cooled to -40 °C. Ketone **37** (204 mg, 0.641 mmol) in MeCN (1 mL) was added to the mixture, which was then allowed to warm up to -20 °C. Then tetramethylammonium triacetoxymethylborohydride (337 mg, 1.28 mmol) was added portionwise for 5 times and stirred for 240 h at the same temperature. Then the mixture was poured into saturated aqueous NaHCO<sub>3</sub> (100 mL) at 0 °C and extracted with AcOEt (100 mL) for three times. The combined organic layers were washed with brine and dried over Na<sub>2</sub>SO<sub>4</sub> and concentrated to give a residue which was purified by silica gel flash chromatography (AcOEt/hexane, 1 : 30) to give diol **38** (162 mg, 0.506 mmol; 79%): IR (neat) 3441, 2967, 2923, 2883, 1639, 1455, 1379, 1078, 970, 909, 735, 698 cm<sup>-1</sup>; <sup>1</sup>H NMR (500 MHz, CDCl<sub>3</sub>) δ 7.30 (m, 5H), 5.80 (dddd, J = 6.8, 8.2, 10.4, 16.2 Hz, 1H), 5.01 (m, 2H), 4.51 (d, J = 11.7 Hz, 1H), 4.47 (d, J = 11.7 Hz, 1H), 3.72 (brs, 1H), 3.64 (dd, J = 1.6, 9.5 Hz, 1H), 3.53 (d, J = 2.8 Hz, 1H), 3.32 (d, J = 8.8 Hz, 1H), 3.30 (d, J = 8.8 Hz, 1H), 2.55 (m, 1H), 1.87 (m, 2H), 1.62 (m, 1H), 1.04 (s, 3H), 1.01 (d, J = 7.2 Hz), 0.88 (s, 3H), 0.76 (d, J = 6.7 Hz, 3H); <sup>13</sup>C NMR (125 MHz, CDCl<sub>3</sub>) δ 138.0, 137.8, 128.9, 128.6, 128.0, 116.2, 85.0, 82.1, 75.5, 74.1, 39.5, 38.1, 36.0, 34.6, 23.0, 20.3, 15.6, 13.6; EI-MS *m/z* 321 (M<sup>+</sup>+1); EI-HRMS Calcd for C<sub>20</sub>H<sub>33</sub>O<sub>3</sub> (M<sup>+</sup>+1) : 321.2430, Found : 321.2432 and stereoisomer **39** (23 mg, 0.0705 mmol; 11%): IR (neat) 3410, 2967, 2936, 2871, 1455, 1096, 982, 910, 736, 697 cm<sup>-1</sup>; <sup>1</sup>H NMR (500 MHz, CDCl<sub>3</sub>) δ 7.26 (m, 5H), 5.75 (m, 1H), 4.96 (m, 1H), 4.91 (m, 1H), 4.45 (d, J = 11.8 Hz, 1H), 4.42 (d, J = 11.8 Hz, 1H), 3.53 (dd, J = 2.5, 9.3 Hz, 1H), 3.45 (d, J = 5.4 Hz, 1H), 3.37 (d, J = 8.7 Hz, 1H), 3.22 (d, J = 8.7 Hz, 1H), 2.15 (m, 1H), 2.00 (m, 1H), 1.79 (m, 1H), 1.61 (m, 1H), 0.97 (s, 3H), 0.78 (s, 3H), 0.75 (d, J = 9.3 Hz, 3H), 0.74 (d, J = 9.1 Hz, 3H); <sup>13</sup>C NMR (125 MHz, CDCl<sub>3</sub>) δ 138.6, 137.7, 128.9, 128.3, 128.1, 115.9, 84.9, 81.1, 75.9, 74.2, 40.0, 39.5, 36.7, 34.9, 23.1, 19.1, 18.9, 11.9; EI-MS *m/z* 320 (M<sup>+</sup>); EI-HRMS Calcd for C<sub>20</sub>H<sub>32</sub>O<sub>3</sub> (M<sup>+</sup>) : 320.2351, Found : 320.2349.

**4-(1-Benzyloxy-2-methyl-2-propyl)-6-(1-pent-4-yl)-2,2,5-trimethyl-1,3-dioxane, a mixture of (4R,5R,6S,4'S) and (4S,5S,6R,4'R) isomers, (40)**: To a solution of diol **38** (123 mg, 0.384 mmol) in DMF (2 mL) were added 2-methoxypropene (110 μL, 1.15 mmol) and small amounts of TsOH·H<sub>2</sub>O, and then the mixture was stirred for 20 h at room temperature. Saturated aqueous NaHCO<sub>3</sub> (30 mL) was added to the mixture followed by the addition of AcOEt (30 mL). The organic layer was separated, and the aqueous phase was further extracted twice with AcOEt (30 mL). The combined organic layers were washed with brine, then dried (Na<sub>2</sub>SO<sub>4</sub>), and concentrated to give a residue which was purified by silica gel flash chromatography (AcOEt/hexane, 1 : 200) to

give acetone **40** (133 mg, 0.368 mmol; 96%) as a colorless oil: IR (neat) 2977, 2933, 2874, 1639, 1455, 1378, 1228, 1099, 1000, 909, 734, 697  $\text{cm}^{-1}$ ;  $^1\text{H}$  NMR (500 MHz,  $\text{CDCl}_3$ )  $\delta$  7.26 (m, 3H), 7.20 (m, 2H), 5.73 (m, 1H), 4.95 (m, 2H), 4.42 (s, 2H), 3.26 (d,  $J$  = 8.4 Hz, 1H), 3.26 (d,  $J$  = 5.6 Hz, 1H), 3.21 (dd,  $J$  = 3.3, 10.3 Hz, 1H), 3.14 (d,  $J$  = 8.4 Hz, 1H), 2.45 (m, 1H), 1.88 (m, 1H), 1.69 (m, 1H), 1.55 (m, 1H), 1.25 (s, 3H), 1.20 (s, 3H), 0.87 (s, 3H), 0.86 (s, 3H), 0.84 (d,  $J$  = 6.6 Hz, 3H), 0.72 (d,  $J$  = 6.7 Hz, 3H);  $^{13}\text{C}$  NMR (125 MHz,  $\text{CDCl}_3$ )  $\delta$  139.4, 137.6, 128.5, 127.7, 127.6, 116.3, 100.4, 78.2, 77.2, 73.8, 73.6, 39.2, 37.9, 32.9, 32.8, 26.3, 23.8, 21.4, 20.2, 14.7, 13.6; EI-MS  $m/z$  360 ( $\text{M}^+$ ); EI-HRMS Calcd for  $\text{C}_{23}\text{H}_{36}\text{O}_3$  ( $\text{M}^+$ ) : 360.2664, Found : 360.2663;  $[\alpha]_D^{26}$  +18.1 (c 1.0,  $\text{CHCl}_3$ ) (71% ee) for optically active **40**.

**4-(1-Benzyloxy-2-methyl-2-propyl)-6-(1-pent-4-yl)-2,2,5-trimethyl-1,3-dioxane, a mixture of (4*R*,5*R*,6*R*,4'*S*) and (4*S*,5*S*,6*S*,4'*R*) isomers, (41):** To a solution of diol **39** (19.8 mg, 0.0619 mmol) in DMF (1 mL) were added 2-methoxypropene (12  $\mu\text{L}$ , 0.124 mmol) and small amount of  $\text{TsOH}\cdot\text{H}_2\text{O}$ , and then the mixture was stirred for 20 h at room temperature. Saturated aqueous  $\text{NaHCO}_3$  (30 mL) was added to the mixture followed by the addition of AcOEt (30 mL). The organic layer was separated, and the aqueous phase was further extracted twice with AcOEt (30 mL). The combined organic layers were washed with brine, then dried ( $\text{Na}_2\text{SO}_4$ ), and concentrated to give a residue which was purified by silica gel flash chromatography (AcOEt/hexane, 1 : 200) to give acetone **41** (16 mg, 0.0451 mmol; 73%) as a colorless oil:  $^1\text{H}$  NMR (500 MHz,  $\text{CDCl}_3$ )  $\delta$  7.33 (m, 3H), 7.27 (m, 2H), 5.75 (m, 1H), 5.01 (m, 2H), 4.48 (s, 2H), 3.49 (d,  $J$  = 9.7 Hz, 1H), 3.40 (d,  $J$  = 8.5 Hz, 1H), 3.39 (dd,  $J$  = 2.3, 9.7 Hz, 1H), 3.14 (d,  $J$  = 8.5 Hz, 1H), 2.12 (m, 1H), 2.00 (m, 1H), 1.80 (m, 1H), 1.68 (m, 1H), 1.32 (s, 3H), 1.28 (s, 3H), 1.03 (s, 3H), 0.94 (s, 3H), 0.85 (d,  $J$  = 6.6 Hz, 3H), 0.82 (d,  $J$  = 6.2 Hz, 3H); EI-MS  $m/z$  345 ( $\text{M}^+ - \text{Me}$ ); EI-HRMS Calcd for  $\text{C}_{22}\text{H}_{33}\text{O}_3$  ( $\text{M}^+ - \text{Me}$ ) : 345.243, Found : 345.2432.

**2-Methyl-2-[2,2,5-trimethyl-6-(1-pent-4-yl)-1,3-dioxan-4-yl]-3-propanol, a mixture of (4'*R*,5'*R*,6'*S*,4'*S*) and (4'*S*,5'*S*,6'*R*,4'*R*) isomers, (43):** Lithium (400 mg, 57.6 mmol) was dissolved in  $\text{liq.NH}_3$  (ca. 30 mL) at  $-78^\circ\text{C}$ , and to the mixture were added *t*-BuOH (1 mL), and then acetone **40** (540 mg, 1.5 mmol) in THF (6 mL). After 40 min MeOH (1 mL) was added to the mixture slowly, followed by the addition of saturated aqueous  $\text{NH}_4\text{Cl}$  (30 mL). AcOEt (30 mL) was added to the mixture, and then the organic layer was separated. The aqueous phase was further extracted twice with AcOEt (30 mL). The combined organic layers were washed with brine, dried ( $\text{Na}_2\text{SO}_4$ ), and concentrated to give a residue which was purified by silica gel flash chromatography (AcOEt/hexane, 1 : 7) to give alcohol **43** (405 mg, 1.5 mmol; quant) as a colorless oil. **43:** IR (neat) 3465, 3075, 2973, 2936, 2871, 1714, 1640, 1462, 1378, 1229, 997, 910  $\text{cm}^{-1}$ ;  $^1\text{H}$  NMR (500 MHz,  $\text{CDCl}_3$ )  $\delta$  5.78 (m, 1H), 5.02 (m, 2H), 3.52 (d,  $J$  = 10.9 Hz, 1H), 3.39 (d,  $J$  =

10.9 Hz, 1H), 3.31 (dd,  $J = 3.3, 10.5$  Hz, 1H), 3.29 (d,  $J = 6.3$  Hz, 1H), 2.49 (m, 1H), 1.93 (m, 1H), 1.76 (m, 1H), 1.61 (m, 1H), 1.34 (s, 3H), 1.30 (s, 3H), 0.92 (s, 3H), 0.91 (s, 3H), 0.91 (d,  $J = 6.3$  Hz, 3H), 0.81 (d,  $J = 6.6$  Hz, 3H);  $^{13}\text{C}$  NMR (125 MHz,  $\text{CDCl}_3$ )  $\delta$  137.1, 116.4, 100.6, 82.5, 73.6, 71.8, 38.8, 37.6, 33.1, 32.6, 26.1, 23.6, 22.0, 19.0, 14.5, 13.7; EI-MS  $m/z$  271 ( $\text{M}^+ + 1$ ); EI-HRMS Calcd for  $\text{C}_{16}\text{H}_{31}\text{O}_3$  ( $\text{M}^+ + 1$ ): 271.2273, Found: 271.2266;  $[\alpha]^{25}_{\text{D}} +29.9$  (c 0.5,  $\text{CHCl}_3$ ) (71% ee) for optically active **43**.

**2-Methyl-2-[2,2,5-trimethyl-6-(1-pent-4-yl)-1,3-dioxan-4-yl]-3-propanal, a mixture of (4'R,5'R,6'S,4''S) and (4'S,5'S,6'R,4''R) isomers, (9):** To a solution of alcohol **43** (384 mg, 1.42 mmol) in  $\text{CH}_2\text{Cl}_2$  (9 mL) were added NMO (250 mg, 2.13 mmol) and MS4A (710 mg) then TPAP (32 mg, 0.071 mmol), and the mixture was allowed to stir for 1 h. The mixture was filtered through celite, and brine (30 mL) was added to the mixture followed by the addition of AcOEt (30 mL). The organic layer was separated, and the aqueous phase was further extracted twice with AcOEt (30 mL). The combined organic layers were washed with brine, then dried ( $\text{Na}_2\text{SO}_4$ ), and concentrated to give a residue which was purified by silica gel flash chromatography (AcOEt/hexane, 1 : 20) to give aldehyde **9** (339 mg, 1.26 mmol; 89%) as a colorless oil: IR (neat) 3734, 3075, 2975, 2935, 2877, 2702, 2360, 2341, 1730, 1639, 1463, 1378, 1221, 1182, 1122, 1083, 1001, 912, 886, 812, 782, 668  $\text{cm}^{-1}$ ;  $^1\text{H}$  NMR (500 MHz,  $\text{CDCl}_3$ )  $\delta$  9.55 (s, 1H), 5.75 (m, 1H), 5.00 (m, 2H), 3.44 (d,  $J = 6.0$  Hz, 1H), 3.27 (dd,  $J = 3.5, 10.5$  Hz, 1H), 2.47 (m, 1H), 1.90 (m, 1H), 1.74 (m, 1H), 1.59 (m, 1H), 1.31 (s, 3H), 1.24 (s, 3H), 1.07 (s, 3H), 1.02 (s, 3H), 0.92 (d,  $J = 6.5$  Hz, 3H), 0.78 (d,  $J = 6.7$  Hz, 3H);  $^{13}\text{C}$  NMR (125 MHz,  $\text{CDCl}_3$ )  $\delta$  206.1, 137.2, 116.5, 100.9, 78.9, 73.5, 50.0, 37.7, 33.1, 32.7, 25.8, 23.6, 19.2, 16.6, 14.7, 13.8; EI-MS  $m/z$  268 ( $\text{M}^+$ ); EI-HRMS Calcd for  $\text{C}_{16}\text{H}_{28}\text{O}_3$  ( $\text{M}^+$ ): 268.2038, Found: 268.2036;  $[\alpha]^{24}_{\text{D}} +27.4$  (c 0.9,  $\text{CHCl}_3$ ) (71% ee) for optically active **9**.

**3-(1-Benzyloxy-2,2-dimethyl-3-pentanol-4-yl)-4-methyl-tetrahydro-2-pyrone, a mixture of (3S,4S,3'R,4'R) and (3R,4R,3'S,4'S) isomers, (42):** To a solution of acetone **40** (36 mg, 0.1 mmol) in THF (1 mL) was added  $\text{BH}_3 \cdot \text{THF}$  complex (200  $\mu\text{L}$ , 1.0 M THF solution, 0.2 mmol) at 0  $^\circ\text{C}$ , and the mixture was stirred for 4 h at room temperature. MeOH (0.2 mL) was added to the mixture slowly followed by 10% aqueous solution of NaOH (0.2 mL) and 30% aqueous solution of  $\text{H}_2\text{O}_2$  (0.2 mL) at 0  $^\circ\text{C}$ , and the whole mixture was stirred for 2 h at room temperature. A saturated aqueous  $\text{NH}_4\text{Cl}$  (30 mL) and saturated aqueous  $\text{Na}_2\text{S}_2\text{O}_3$  (20 mL) were added to the mixture at 0  $^\circ\text{C}$  followed by the addition of AcOEt (50 mL). The organic layer was separated, and the aqueous phase was further extracted twice with AcOEt (30 mL). The combined organic layers were washed with brine, then dried ( $\text{Na}_2\text{SO}_4$ ), and concentrated to give a residue which was purified by preparative thin-layer chromatography (silica gel, AcOEt/hexane, 1 : 2) to give alcohol (25 mg,



0.067 mmol; 67%).

To a mixture of alcohol (25 mg, 0.067 mmol) in DMF (2 mL) was added PDC (248 mg, 0.66 mmol), and the mixture was stirred for 36 h at room temperature. Brine (30 mL) was added to the mixture at 0 °C followed by the addition of AcOEt (30 mL). The organic layer was separated, and the aqueous phase was further extracted twice with AcOEt (30 mL). The combined organic layers were washed with brine, then dried (Na<sub>2</sub>SO<sub>4</sub>), and concentrated to give a residue which was purified by silica gel flash chromatography (AcOEt/hexane, 1 : 1) to give the carboxylic acid (7.8 mg, 0.0198 mmol; 30%) as a colorless oil.

To a mixture of carboxylic acid (7.8 mg, 0.0198 mmol) in THF (1.5 mL) was added 1N. aqueous solution of HCl (1 mL), and the mixture was stirred for 48 h at 50 °C. Saturated aqueous NaHCO<sub>3</sub> (30 mL) was added to the mixture followed by the addition of AcOEt (30 mL). The organic layer was separated, and the aqueous phase was further extracted twice with AcOEt (30 mL). The combined organic layers were washed with brine, then dried (Na<sub>2</sub>SO<sub>4</sub>), and concentrated to give a residue which was purified by preparative thin-layer chromatography (silica gel, AcOEt/hexane, 1 : 2) to give lactone **42** (4.7 mg, 0.014 mmol; 70%): IR (neat) 3462, 2961, 2929, 2874, 1731, 1455, 1382, 1252, 1211, 1092, 1029, 996, 737, 698 cm<sup>-1</sup>; <sup>1</sup>H NMR (500 MHz, CDCl<sub>3</sub>) δ 7.31 (m, 5H), 4.58 (dd, J = 1.7, 10.2 Hz, 1H), 4.51 (d, J = 12.0 Hz, 1H), 4.48 (d, J = 12.0 Hz, 1H), 3.58 (m, 1H), 3.38 (d, J = 8.8 Hz, 1H), 3.28 (d, J = 8.8 Hz, 1H), 3.8 (d, J = 4.5 Hz, 1H), 2.61 (ddd, J = 3.6, 6.6, 17.5 Hz, 1H), 2.44 (ddd, J = 6.9, 10.5, 17.5 Hz, 1H), 2.00 (m, 1H), 1.86 (m, 2H), 1.56 (m, 1H), , 0.99 (d, J = 6.7 Hz, 3H), 0.99 (s, 3H), 0.97 (s, 3H), 0.94 (d, J = 6.2 Hz, 3H); <sup>13</sup>C NMR(125MHz,CDCl<sub>3</sub>)δ 172.0, 138.5, 128.7, 128.0, 127.9, 86.5, 79.4, 78.6, 73.9, 39.9, 36.1, 30.1, 30.0, 28.5, 23.7, 20.5, 17.5, 12.8; EI-MS *m/z* 316 (M<sup>+</sup>); EI-HRMS Calcd for C<sub>20</sub>H<sub>30</sub>O<sub>4</sub> (M<sup>+</sup>) : 316.2038, Found : 316.2042.

**(3*S*,5*S*,2'*S*,3'*R*,4'*R*)-5-(*tert*-butyldimethylsilyloxy)-4,4-dimethyl-3-(4-methyl-6-hepten-3-ol-2-yl)tetrahydro-2-pyrone (51):** Into a flame dried flask, MS4A (9.7 mg) was put and dried at 180 °C for 12 h under the reduced pressure. Ligand **45** (1.6 mg, 0.00387 mmol) and K<sub>2</sub>CO<sub>3</sub> (6.7 mg, 0.0484 mmol) were added, followed by CH<sub>2</sub>Cl<sub>2</sub> (400 μL) under argon atmosphere. To the suspension were added SnCl<sub>4</sub> (4 μL, 0.00387 mmol, 1 M in CH<sub>2</sub>Cl<sub>2</sub>) and BTSP (206 μL, 0.194 mmol, 0.94 M in CH<sub>2</sub>Cl<sub>2</sub>) at 0 °C. After 10 min aldol **44** (19 mg, 0.0484 mmol) in CH<sub>2</sub>Cl<sub>2</sub> (600 μL) was added to the mixture and the whole mixture was stirred for 10 h at the same temperature. Saturated aqueous Na<sub>2</sub>S<sub>2</sub>O<sub>3</sub> (30 mL) was added to the mixture followed by the addition of AcOEt (30 mL). The organic layer was separated, and the aqueous phase was further extracted twice with AcOEt (30 mL). The combined organic layers were washed with brine, then dried (Na<sub>2</sub>SO<sub>4</sub>), and concentrated to give a residue which was purified by preparative thin-layer chromatography (silica

gel, AcOEt/hexane, 1 : 10) to give ester (11 mg, 0.0266 mmol; 55 %) as a colorless oil.

To a solution of ester (20 mg, 0.049 mmol) in  $\text{CH}_2\text{Cl}_2$  (1.2 mL) were added diisopropylethylamine (26  $\mu\text{L}$ , 0.15 mmol) and *tert*-butyldimethylsilyl trifluoromethanesulfonate (17  $\mu\text{L}$ , 0.074 mmol), and the mixture was stirred for 30 min. AcOEt (30 mL) was added to the mixture followed by the addition of saturated aqueous  $\text{NH}_4\text{Cl}$  (30 mL). The organic layer was separated, and the aqueous phase was further extracted twice with AcOEt (30 mL). The combined organic layers were washed with brine, then dried ( $\text{Na}_2\text{SO}_4$ ), and concentrated to give a residue which was purified by silica gel flash chromatography (AcOEt/hexane, 1 : 10) to give silyl-ether (22 mg, 0.424 mmol; 94%) as a colorless oil.

Silyl-ether (80 mg, 0.2 mmol) was dissolved in  $\text{CH}_2\text{Cl}_2$  (1 mL) and the solution was cooled to  $-78^\circ\text{C}$ .  $\text{BCl}_3$  (96  $\mu\text{L}$ , 0.0964 mmol, 1 M in  $\text{CH}_2\text{Cl}_2$ ) was added to the solution, which was stirred at the same temperature for 20 min. Saturated aqueous  $\text{NaHCO}_3$  (30 mL) was added to the mixture followed by the addition of AcOEt (30 mL). The organic layer was separated, and the aqueous phase was further extracted twice with AcOEt (30 mL). The combined organic layers were washed with brine, then dried ( $\text{Na}_2\text{SO}_4$ ), and concentrated to give a residue which was purified by silica gel flash chromatography (AcOEt/hexane, 1 : 2) to give lactone **51** (5.9 mg, 0.0154 mmol; 80%) as a colorless oil:  $[\alpha]_D^{22} -12.1$  (c 0.14,  $\text{CHCl}_3$ ) (89% ee);  $^1\text{H}$  NMR (500 MHz,  $\text{CDCl}_3$ )  $\delta$  5.81 (m, 1H), 5.03 (m, 2H), 3.86 (d,  $J = 3.8$  Hz, 1H), 3.69 (m, 1H), 3.64 (dd,  $J = 6.9, 9.6$  Hz, 1H), 2.82 (dd,  $J = 6.9, 18.2$  Hz, 1H), 2.58 (m, 1H), 2.48 (dd,  $J = 9.6, 18.2$  Hz, 1H), 2.36 (d,  $J = 3.2$  Hz, 1H), 2.20 (m, 1H), 1.90 (m, 1H), 1.67 (m, 1H), 1.06 (d,  $J = 6.8$  Hz, 3H), 1.01 (s, 3H), 0.94 (s, 3H), 0.90 (s, 9H), 0.84 (d,  $J = 7.2$  Hz, 3H), 0.07 (s, 6H);  $^{13}\text{C}$  NMR (125 MHz,  $\text{CDCl}_3$ )  $\delta$  170.2, 137.8, 116.6, 89.6, 74.3, 72.7, 39.8, 38.1, 37.9, 36.0, 34.4, 26.0, 23.2, 18.3, 16.0, 13.6, 12.9,  $-3.9, -4.5$ ; EI-MS  $m/z$  327 ( $\text{M}^+ - t\text{-Bu}$ ); EI-HRMS Calcd for  $\text{C}_{17}\text{H}_{31}\text{O}_4\text{Si}$  ( $\text{M}^+ - t\text{-Bu}$ ) : 327.1991, Found : 327.1991.

**(S)-3-(4-*tert*-Butylphenylthio)-2-methyl-1-propanol (52):** To a solution of **16** (2.75 g, 9.28 mmol) in  $\text{Et}_2\text{O}$  (30 mL) was added LAH (700 mg, 18.4 mmol) at room temperature and the mixture was stirred for 1 h. Saturated aqueous  $\text{Na}_2\text{SO}_4$  (30 mL) was added to the mixture at  $0^\circ\text{C}$  followed by the addition of AcOEt (30 mL) and the whole mixture was stirred for 6 h at room temperature. The organic layer was separated, and the aqueous phase was further extracted twice with AcOEt (30 mL). The combined organic layers were washed with brine, then dried ( $\text{Na}_2\text{SO}_4$ ), and concentrated to give a residue which was purified by silica gel flash chromatography (AcOEt/hexane, 1 : 2) to give alcohol **52** (2.1 g, 8.82 mmol; 95%) as a colorless oil:  $[\alpha]_D^{24} -9.38$  (c 0.5,  $\text{CHCl}_3$ ) (87% ee); IR (neat) 3346, 2961, 1497, 1460, 1362, 1268, 1120, 1035, 820  $\text{cm}^{-1}$ ;  $^1\text{H}$  NMR (500 MHz,  $\text{CDCl}_3$ )  $\delta$

7.30 (s, 4H), 3.62 (dd,  $J = 5.4, 10.7$  Hz, 1H), 3.59 (dd,  $J = 5.8, 10.7$  Hz, 1H), 3.03 (dd,  $J = 6.2, 12.7$  Hz, 1H), 2.82 (dd,  $J = 6.9, 12.7$  Hz, 1H), 1.95 (m, 1H), 1.78 (s, 1H), 1.31 (s 9H), 1.05 (d,  $J = 6.8$  Hz, 3H);  $^{13}\text{C}$  NMR (125 MHz,  $\text{CDCl}_3$ )  $\delta$  149.5, 133.4, 129.6, 126.3, 67.2, 38.2, 35.8, 34.7, 31.6, 16.8; EI-MS  $m/z$  238 ( $\text{M}^+$ ); EI-HRMS Calcd for  $\text{C}_{14}\text{H}_{22}\text{OS}(\text{M}^+)$  : 238.1391, Found : 238.1392.

**(S)-3-(4-*tert*-Butylphenylthio)-1-(4-methoxybenzyloxy)-2-methyl-propane (53):** To a solution of **52** (2.1 g, 8.82 mmol) in DMF (30 mL) was added NaH (370 mg, 9.26 mmol) at 0 °C and the mixture was stirred for 30 min. Then 4-methoxybenzyl chloride (1.41 mL, 9.7 mmol) was added to the mixture, which was then stirred for 4 h at room temperature. Saturated aqueous  $\text{NH}_4\text{Cl}$  (30 mL) was added to the mixture followed by the addition of AcOEt (30 mL). The organic layer was separated, and the aqueous phase was further extracted twice with AcOEt (30 mL). The combined organic layers were washed with brine, then dried ( $\text{Na}_2\text{SO}_4$ ), and concentrated to give a residue which was purified by silica gel flash chromatography (AcOEt/hexane, 1 : 2) to give ether **53** (3.1 g, 8.64 mmol; 98%) as a colorless oil:  $[\alpha]_D^{24} +12.5$  (c 0.9,  $\text{CHCl}_3$ ) (87% ee); IR (neat) 2959, 1612, 1513, 1462, 1362, 1302, 1247, 1173, 1092, 1037, 821  $\text{cm}^{-1}$ ;  $^1\text{H}$  NMR (500 MHz,  $\text{CDCl}_3$ )  $\delta$  7.30 (s, 4H), 7.25 (m, 2H), 6.89 (m, 2H), 4.41 (s, 2H), 3.82 (s, 3H), 3.41 (d,  $J = 6.2$  Hz, 1H), 3.13 (dd,  $J = 5.7, 12.6$  Hz, 1H), 2.78 (dd,  $J = 5.6, 12.7$  Hz, 1H), 2.07 (m, 1H), 1.31 (s 9H), 1.07 (d,  $J = 6.6$  Hz, 3H);  $^{13}\text{C}$  NMR (125 MHz,  $\text{CDCl}_3$ )  $\delta$  159.4, 149.2, 133.9, 131.0, 129.4, 129.3, 126.2, 114.1, 74.1, 73.0, 55.6, 38.3, 34.7, 34.1, 31.6, 17.1; EI-MS  $m/z$  358 ( $\text{M}^+$ ); EI-HRMS Calcd for  $\text{C}_{22}\text{H}_{30}\text{O}_2\text{S}(\text{M}^+)$  : 358.1966, Found : 358.1967.

**(R)-3-(4-Methoxybenzyloxy)-2-methyl-propanal (54):** To a solution of **53** (3.1 g, 8.82 mmol) in  $\text{CH}_2\text{Cl}_2$  (30 mL) was added mCPBA (2.17 g, 9.7 mmol) at -20 °C and the mixture was stirred for 30 min. Saturated aqueous  $\text{NaHCO}_3$  (30 mL) and saturated aqueous  $\text{Na}_2\text{S}_2\text{O}_3$  (30 mL) were added to the mixture. Then AcOEt (30 mL) was added and the organic layer was separated, and the aqueous phase was further extracted twice with AcOEt (30 mL). The combined organic layers were washed with brine, then dried ( $\text{Na}_2\text{SO}_4$ ), and concentrated to give a residue which was purified by silica gel flash chromatography (AcOEt/hexane, 1 : 5) to give a diastereomixture of sulfoxides as a colorless oil.

To a solution of the diastereomixture of sulfoxides in  $\text{CH}_2\text{Cl}_2$  (30 mL) was added pyridine (3.57 mL, 44 mmol) and trifluoroacetic anhydride (2.49 mL, 17.6 mmol) at 0 °C and the mixture was stirred for 30 min. Saturated aqueous  $\text{NaHCO}_3$  (30 mL) was added to the mixture followed by the addition of AcOEt (30 mL). The organic layer was separated, and the aqueous phase was further extracted twice with AcOEt (30 mL). The combined organic layers were washed with brine, then dried ( $\text{Na}_2\text{SO}_4$ ), and concentrated to give a residue which was purified by silica gel flash chromatography (AcOEt/hexane, 1 : 2) to give aldehyde **50** (1.17 g, 5.62 mmol; 78%) as a colorless

oil:  $[\alpha]_D^{22}$  -27.7 (c 0.4,  $\text{CHCl}_3$ ) (87% ee); IR (neat) 2936, 2859, 2725, 1723, 1612, 1514, 1459, 1302, 1249, 1174, 1095, 1035, 819  $\text{cm}^{-1}$ ;  $^1\text{H}$  NMR (500 MHz,  $\text{CDCl}_3$ )  $\delta$  9.71 (d,  $J$  = 1.5 Hz, 1H), 7.24 (m, 2H), 6.88 (m, 2H), 4.45 (s, 2H), 3.80 (s, 3H), 3.64 (dd,  $J$  = 6.6, 9.3 Hz, 1H), 2.78 (dd,  $J$  = 5.4, 9.3 Hz, 1H), 2.64 (m, 1H), 1.12 (d,  $J$  = 7.3 Hz, 3H);  $^{13}\text{C}$  NMR (125 MHz,  $\text{CDCl}_3$ )  $\delta$  204.2, 169.6, 130.3, 129.6, 114.1, 73.3, 70.1, 55.6, 47.1, 11.0; EI-MS  $m/z$  208 ( $\text{M}^+$ ); EI-HRMS Calcd for  $\text{C}_{12}\text{H}_{16}\text{O}_3(\text{M}^+)$  : 208.1099, Found : 208.1097.

**(S)-3-(4-Methoxybenzyloxy)-2-methyl-1-propanol (55):** To a solution of **54** (1.5 g, 7.21 mmol) in MeOH (10 mL) was added  $\text{NaBH}_4$  (273 mg, 7.21 mmol) at 0 °C and the mixture was stirred for 10 min at room temperature. Saturated aqueous  $\text{NH}_4\text{Cl}$  (30 mL) was added to the mixture followed by the addition of AcOEt (30 mL). The organic layer was separated, and the aqueous phase was further extracted twice with AcOEt (30 mL). The combined organic layers were washed with brine, then dried ( $\text{Na}_2\text{SO}_4$ ), and concentrated to give a residue which was purified by silica gel flash chromatography (AcOEt/hexane, 1 : 2) to give alcohol **55** (1.52 g, 7.21 mmol; 100%) as a colorless oil:  $[\alpha]_D^{23}$  -14.7 (c 0.44,  $\text{CHCl}_3$ ) (87% ee); IR (neat) 3420, 2872, 1613, 1514, 1464, 1302, 1248, 1173, 1092, 1037, 820  $\text{cm}^{-1}$ ;  $^1\text{H}$  NMR (500 MHz,  $\text{CDCl}_3$ )  $\delta$  7.24 (m, 2H), 6.88 (m, 2H), 4.45 (d,  $J$  = 11.4 Hz, 1H), 4.42 (d,  $J$  = 11.4 Hz, 1H), 3.80 (s, 3H), 3.60 (dd,  $J$  = 4.4, 10.5 Hz, 1H), 3.56 (dd,  $J$  = 7.9, 10.5 Hz, 1H), 3.51 (dd,  $J$  = 4.6, 9.0 Hz, 1H), 3.39 (dd,  $J$  = 7.8, 9.0 Hz, 1H), 2.61 (brs, 1H), 2.04 (m, 1H), 0.87 (d,  $J$  = 6.8 Hz, 3H);  $^{13}\text{C}$  NMR (125 MHz,  $\text{CDCl}_3$ )  $\delta$  159.5, 130.4, 129.5, 114.1, 75.4, 73.3, 38.1, 55.5, 35.8, 13.8; EI-MS  $m/z$  210 ( $\text{M}^+$ ); EI-HRMS Calcd for  $\text{C}_{12}\text{H}_{18}\text{O}_3(\text{M}^+)$  : 210.1256, Found : 210.1255.

**(R)-3-Bromo-1-(4-methoxybenzyloxy)-2-methyl-1-propane (56):** To a solution of **55** (995 mg, 4.73 mmol) in  $\text{CH}_2\text{Cl}_2$  (30 mL) was added  $\text{PPh}_3$  (2.48 g, 9.46 mmol) and  $\text{CBr}_4$  (3.14 g, 9.46 mmol) at 0 °C and the mixture was stirred for 12 h at room temperature. Saturated aqueous  $\text{NaHCO}_3$  (30 mL) was added to the mixture followed by the addition of AcOEt (30 mL). The organic layer was separated, and the aqueous phase was further extracted twice with AcOEt (30 mL). The combined organic layers were washed with brine, then dried ( $\text{Na}_2\text{SO}_4$ ), and concentrated to give a residue which was purified by silica gel flash chromatography (AcOEt/hexane, 1 : 2) to give bromide **56** (1.29 g, 4.73 mmol; 100%) as a colorless oil:  $[\alpha]_D^{22}$  -9.6 (c 0.47,  $\text{CHCl}_3$ ) (87% ee); IR (neat) 2961, 2864, 1612, 1513, 1459, 1300, 1248, 1175, 1094, 1037, 822  $\text{cm}^{-1}$ ;  $^1\text{H}$  NMR (500 MHz,  $\text{CDCl}_3$ )  $\delta$  7.26 (m, 2H), 6.89 (m, 2H), 4.45 (s, 2H), 3.81 (s, 3H), 3.51 (dd,  $J$  = 4.8, 9.7 Hz, 1H), 3.48 (dd,  $J$  = 5.7, 9.7 Hz, 1H), 3.40 (dd,  $J$  = 5.1, 9.0 Hz, 1H), 3.36 (dd,  $J$  = 6.9, 9.0 Hz, 1H), 2.12 (m, 1H), 1.02 (d,  $J$  = 6.6 Hz, 3H);  $^{13}\text{C}$  NMR (125 MHz,  $\text{CDCl}_3$ )  $\delta$  159.5, 130.8, 129.5, 114.1, 73.2, 72.8, 55.6, 38.6, 36.0, 16.2; EI-MS  $m/z$  272 ( $\text{M}^+$ ); EI-HRMS Calcd for  $\text{C}_{12}\text{H}_{17}\text{O}_2\text{Br}(\text{M}^+)$  : 272.0411, Found : 272.0411.

**(S)-1-(4-methoxybenzyloxy)-2-methyl-4-pentene (57):** To a suspension of CuCN (3.7 g, 41.4 mmol) in THF (20 mL) was added MeLi (75 mL, 1.1 M Et<sub>2</sub>O solution, 82.7 mmol) at -78 °C then the mixture was warmed up to 0 °C and stirred for 20 min. The mixture was cooled to -78 °C again and tetravinyltin (2.41 g, 8.27 mmol) was added to the mixture, then the whole mixture was warmed up to room temperature and stirred for 90 min. The mixture was cooled to -78 °C again and **56** (2.26 g, 8.27 mmol) in THF (5 mL) was added to the mixture, which was then gradually warmed up to room temperature. After stirring for 20 h, saturated aqueous NH<sub>4</sub>Cl (30 mL) and aqueous NH<sub>3</sub> (30 mL) were added to the mixture. The organic layer was separated, and the aqueous phase was further extracted twice with AcOEt (50 mL). The combined organic layers were washed with brine, then dried (Na<sub>2</sub>SO<sub>4</sub>), and concentrated to give a residue which was purified by silica gel flash chromatography (AcOEt/hexane, 1 : 20) to give alkene **57** (1.53 g, 4.96 mmol; 60%) as a colorless oil:  $[\alpha]_D^{23}$  -2.4 (c 0.52, CHCl<sub>3</sub>) (87% ee); IR (neat) 2956, 2857, 1613, 1514, 1463, 1302, 1248, 1173, 1093, 1038, 912, 821 cm<sup>-1</sup>; <sup>1</sup>H NMR (500 MHz, CDCl<sub>3</sub>) δ 7.27 (m, 2H), 6.89 (m, 2H), 5.78 (m, 1H), 5.01 (m, 2H), 4.44 (s, 2H), 3.81 (s, 3H), 3.31 (dd, J = 6.2, 8.8 Hz, 1H), 3.25 (dd, J = 5.8, 8.8 Hz, 1H), 2.22 (m, 1H), 1.89, (m, 2H), 0.93 (d, J = 6.7 Hz, 3H); <sup>13</sup>C NMR (125 MHz, CDCl<sub>3</sub>) δ 159.4, 137.3, 131.2, 129.4, 116.2, 114.0, 75.4, 73.0, 55.6, 38.4, 33.7, 17.1; EI-MS *m/z* 220 (M<sup>+</sup>); EI-HRMS Calcd for C<sub>14</sub>H<sub>20</sub>O<sub>2</sub>(M<sup>+</sup>) : 220.1463, Found : 220.1464.

**(4R,5S,6S)-1-Benzoyloxy-5-tert-butyldimethylsilyloxy-2,2,4,6-tetramethyl-8-nonen-3-one (58):** To a solution of aldol **13** (63 mg, 0.172 mmol) in CH<sub>2</sub>Cl<sub>2</sub> (3 mL) were added diisopropylethylamine (150 μL, 0.86 mmol) and *tert*-butyldimethylsilyl trifluoromethanesulfonate (120 μL, 0.86 mmol), and the mixture was stirred for 30 min. AcOEt (30 mL) was added to the mixture followed by the addition of saturated aqueous NH<sub>4</sub>Cl (30 mL). The organic layer was separated, and the aqueous phase was further extracted twice with AcOEt (30 mL). The combined organic layers were washed with brine, then dried (Na<sub>2</sub>SO<sub>4</sub>), and concentrated to give a residue which was purified by silica gel flash chromatography (AcOEt/hexane, 1 : 10) to give silyl-ether **58** as a colorless oil:  $[\alpha]_D^{22}$  -7.5 (c 0.79, CHCl<sub>3</sub>) (71% ee); IR (neat) 2929, 1698, 1462, 1362, 1256, 1100, 1029, 837, 774, 697 cm<sup>-1</sup>; <sup>1</sup>H NMR (500 MHz, CDCl<sub>3</sub>) δ 7.30 (m, 5H), 5.70 (m, 1H), 4.96 (m, 2H), 4.49 (s, 2H), 3.90 (dd, J = 1.8, 7.8 Hz, 1H), 3.46 (s, 2H), 3.23 (m, 1H), 2.22 (m, 1H), 1.82 (m, 1H), 1.46 (m, 1H), 1.21 (s, 3H), 1.19 (s, 3H), 1.09 (d, J = 6.8 Hz, 3H), 0.94 (s, 9H), 0.91 (d, J = 6.7 Hz, 3H), 0.10 (s, 3H), 0.09 (s, 3H); <sup>13</sup>C NMR (125 MHz, CDCl<sub>3</sub>) δ 218.2, 139.0, 138.3, 129.6, 127.9, 115.8, 78.0, 77.4, 73.6, 49.5, 45.2, 38.5, 35.7, 26.6, 23.1, 22.9, 18.9, 18.0, 16.4, -3.2, -3.4; EI-MS *m/z* 432 (M<sup>+</sup>); EI-HRMS Calcd for C<sub>26</sub>H<sub>44</sub>O<sub>3</sub>Si (M<sup>+</sup>) : 432.306, Found : 432.3059.

**(4R,5R,6S,4'S)-4-(1-Benzoyloxy-2-methyl-2-propyl)-6-(1-pent-4-yl)-2,2,5-trimethyl-1,3-**

**dioxane (40):** Silyl-ether **58** (105 mg, 0.3 mmol) was dissolved in toluene (20 mL) and cooled to -78 °C. DIBAL (325 µL, 1 M solution in toluene, 0.32 mmol) was added dropwise to maintain the temperature at -78 °C. After the addition was complete, the reaction mixture was stirred at the same temperature for 1 h. Saturated aqueous Rochelle salt solution (40 mL) and AcOEt (30 mL) were successively added, and the quenched mixture was allowed to warm to room temperature and stirred for 2 h. The organic layer was separated, and the aqueous phase was further extracted twice with AcOEt (30 mL). The combined organic layers were washed with brine, then dried (Na<sub>2</sub>SO<sub>4</sub>), and concentrated to give a residue which was purified by silica gel flash chromatography (AcOEt/hexane, 1 : 10) to give alcohol (86 mg, 0.28 mmol; 94%) as a colorless oil.

To a solution of the alcohol (123 mg, 0.384 mmol) in DMF (2 mL) were added 2-methoxypropene (110 µL, 1.15 mmol) and small amounts of TsOH•H<sub>2</sub>O, and then the mixture was stirred for 20 h at room temperature. Saturated aqueous NaHCO<sub>3</sub> (30 mL) was added to the mixture followed by the addition of AcOEt (30 mL). The organic layer was separated, and the aqueous phase was further extracted twice with AcOEt (30 mL). The combined organic layers were washed with brine, then dried (Na<sub>2</sub>SO<sub>4</sub>), and concentrated to give a residue which was purified by silica gel flash chromatography (AcOEt/hexane, 1 : 200) to give acetone **40** (133 mg, 0.368 mmol; 96%) as a colorless oil.

**Epothilone A (1):** To a mixture of lactone **60** (4.4 mg, 0.0062 mmol) in THF (1 mL) was added HF•Py (0.5 mL) at 0 °C and the mixture was stirred at room temperature for 12 h. Then the mixture was poured into saturated aqueous NaHCO<sub>3</sub> (20 mL) at 0 °C carefully and extracted with AcOEt (20 mL) for three times. The combined organic layers were washed with brine and dried over Na<sub>2</sub>SO<sub>4</sub> and concentrated to give a residue which was purified by silica gel flash chromatography (AcOEt/hexane, 1 : 1) then preparative thin-layer chromatography (silica gel, AcOEt/hexane, 1 : 1.5) to give epothilone C (**3**) (3.0 mg, 0.0062 mmol; 99%). To a solution of epothilone C (**3**) (3.0 mg, 0.0062 mmol) in CH<sub>2</sub>Cl<sub>2</sub> (1 mL) was added freshly prepared 3,3-dimethyldioxirane (0.5 mL, ca. 0.1 M in acetone) at -50 °C. The mixture was allowed to warm up to -30 °C and stirred for 2 h. A stream of argon was then bubbled through the solution to remove excess 3,3-dimethyldioxirane. The residue was purified by silica gel flash chromatography (AcOEt) then preparative thin-layer chromatography (silica gel, AcOEt/hexane, 2 : 1) to give epothilone A (**1**). The spectral data of **1** thus obtained were identical with those of an authentic sample.<sup>2h,2l</sup>

**Epothilone B (2):** To a mixture of lactone **62** (3.4 mg, 0.00475 mmol) in THF (1 mL) was added HF•Py (0.5 mL) at 0 °C and the mixture was stirred at room temperature for 12 h. Then the mixture was poured into saturated aqueous NaHCO<sub>3</sub> (30 mL) at 0 °C and extracted with AcOEt (20

mL) for three times. The combined organic layers were washed with brine and dried over  $\text{Na}_2\text{SO}_4$  and concentrated to give a residue which was purified by silica gel flash chromatography (AcOEt/hexane, 1 : 1) then preparative thin-layer chromatography (silica gel, AcOEt/hexane, 1 : 1) to give epothilone D (**4**) (2.1 mg, 0.00434 mmol; 92%).

To a solution of epothilone D (**4**) (2.0 mg, 0.00407 mmol) in  $\text{CH}_2\text{Cl}_2$  (1 mL) was added freshly prepared 3,3-dimethyldioxirane (0.5 ml, ca. 0.1M in acetone) at  $-78\text{ }^\circ\text{C}$ . The mixture was allowed to warm up to  $-50\text{ }^\circ\text{C}$  and stirred for 3 h. A stream of argon was then bubbled through the solution to remove excess 3,3-dimethyldioxirane. The residue was purified by silica gel flash chromatography (AcOEt/hexane, 2 : 1) then preparative thin-layer chromatography (silica gel, AcOEt/hexane, 2 : 1) to give epothilone B (**2**) (2 mg, 0.00395 mmol; 97%). The spectral data of **2** thus obtained were identical with those of an authentic sample.<sup>2h</sup>

(2R,3E)-2-Hydroxy-3-methyl-4-(2-methyl-1,3-thiazol-4-yl)-3-butenitrile (6)

Date : Thu Oct 7 14:25:27 1999  
 FileName : .LoadingFID.nmd  
 Comment : 1H Line  
 SliceHistory : non  
 EXMODE :  
 POINT : 32768 00in  
 SAMPD : 32768 00in  
 FREQD : 10000.0 Hz  
 FILTR : 5000 Hz  
 DELAY : 40.0 usec  
 DEADT : 57.0 usec  
 INVTL : 100.0 usec  
 TIMES : 16 time  
 DUMMY : 0 time  
 PD : 3.7232 sec  
 ACQTM : 3276.7998 msec  
 PREDL : 0.01000 msec  
 INIWT : 1000.0000 msec  
 RESOL : 0.31 Hz  
 PW1 : 6.05 usec  
 1H : 500.00 MHz  
 OBFRQ : 162160.00 Hz  
 OBSET : 19  
 RGAIN :  
 SCANS : 16 time  
 SLVNT : CDCL3  
 SPINNING : 12 Hz  
 TEMP : 26.8 C

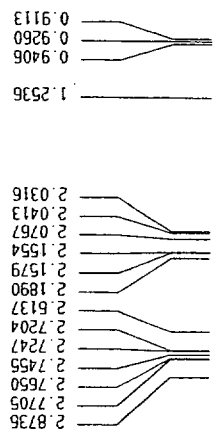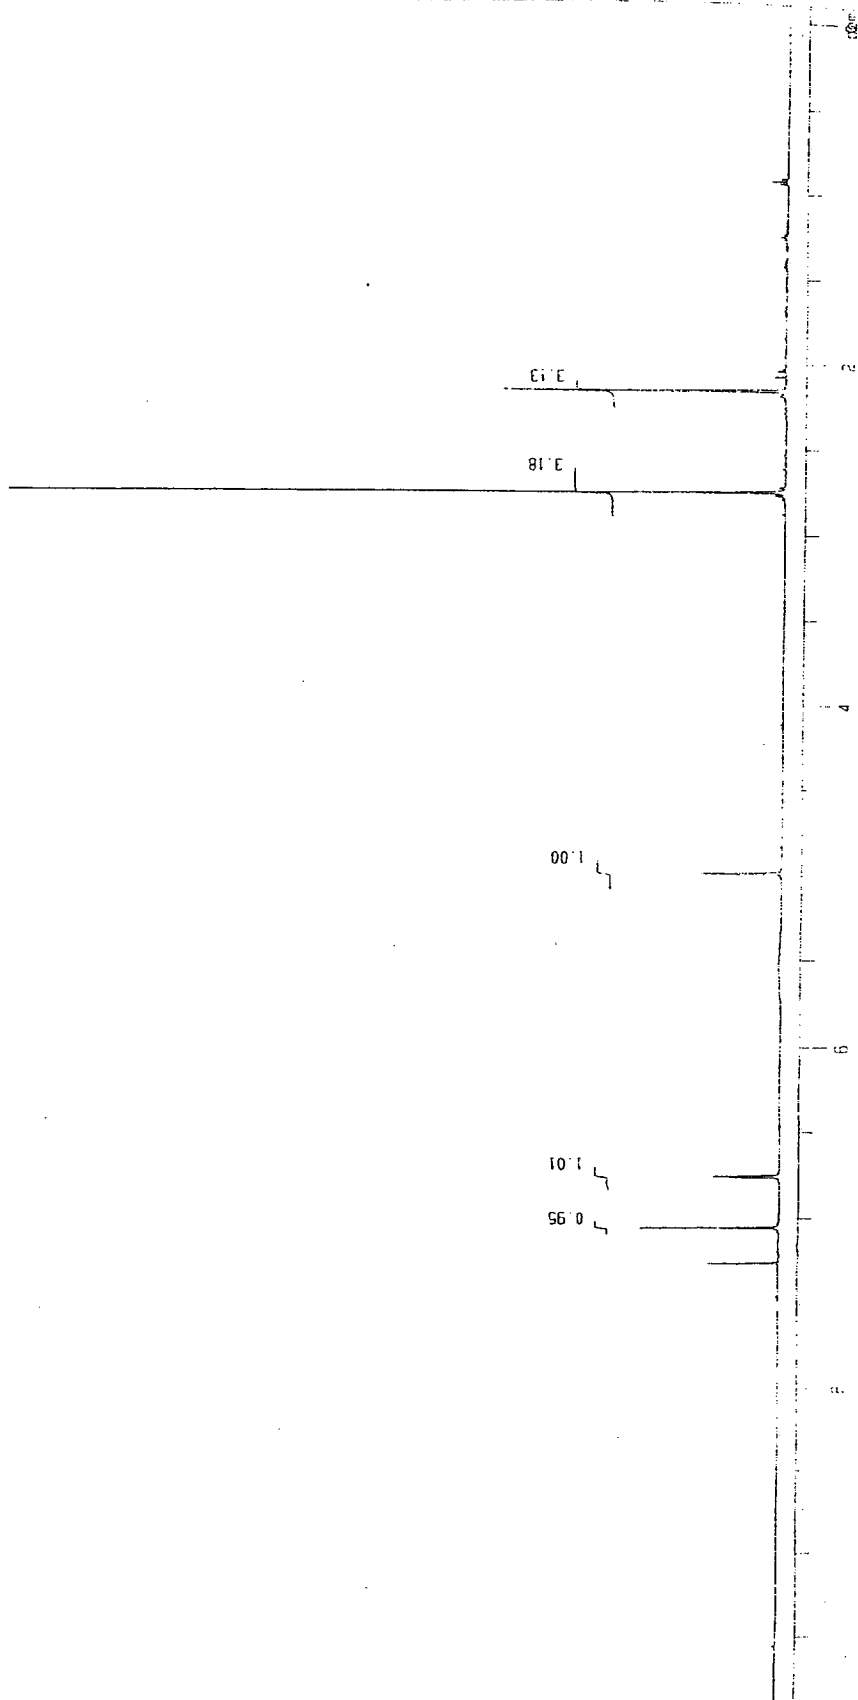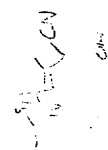



(2R,3E)-2-Hydroxy-3-methyl-4-(2-methyl-1,3-thiazol-4-yl)-3-butenenitrile (6)

Date : Thu Oct 7 14:36:24 1999  
 FileName : LoadingFID.nmra  
 Comment : 1H Line  
 SliceHistory : bcm  
 EXMODE :  
 POINT 32768 point  
 SAMP0 32768 point  
 FREQ0 33898.3 Hz  
 FILTA 16950 Hz  
 DELAY 11.8 usec  
 DEADT 10.0 usec  
 INTVL 29.5 usec  
 TIMES 600 times  
 DUMM1 0 times  
 PD 2.0333 sec  
 ACQTM 966.6560 msec  
 PREDL 0.01000 msec  
 INIWT 1000.0000 msec  
 RESOL 1.03 Hz  
 PW1 5.60 usec  
 13C 125.65 MHz  
 OBSFQ 127958.00 Hz  
 AGAIN 30  
 1H 500.00 MHz  
 TRFQ 162160.00 Hz  
 TRSET 50.0 usec  
 TRPPW 0  
 TRNS 0  
 SCANS 200 times  
 SLVNT CDCL3  
 SPINNING 13 Hz  
 TEMP 28.3 C

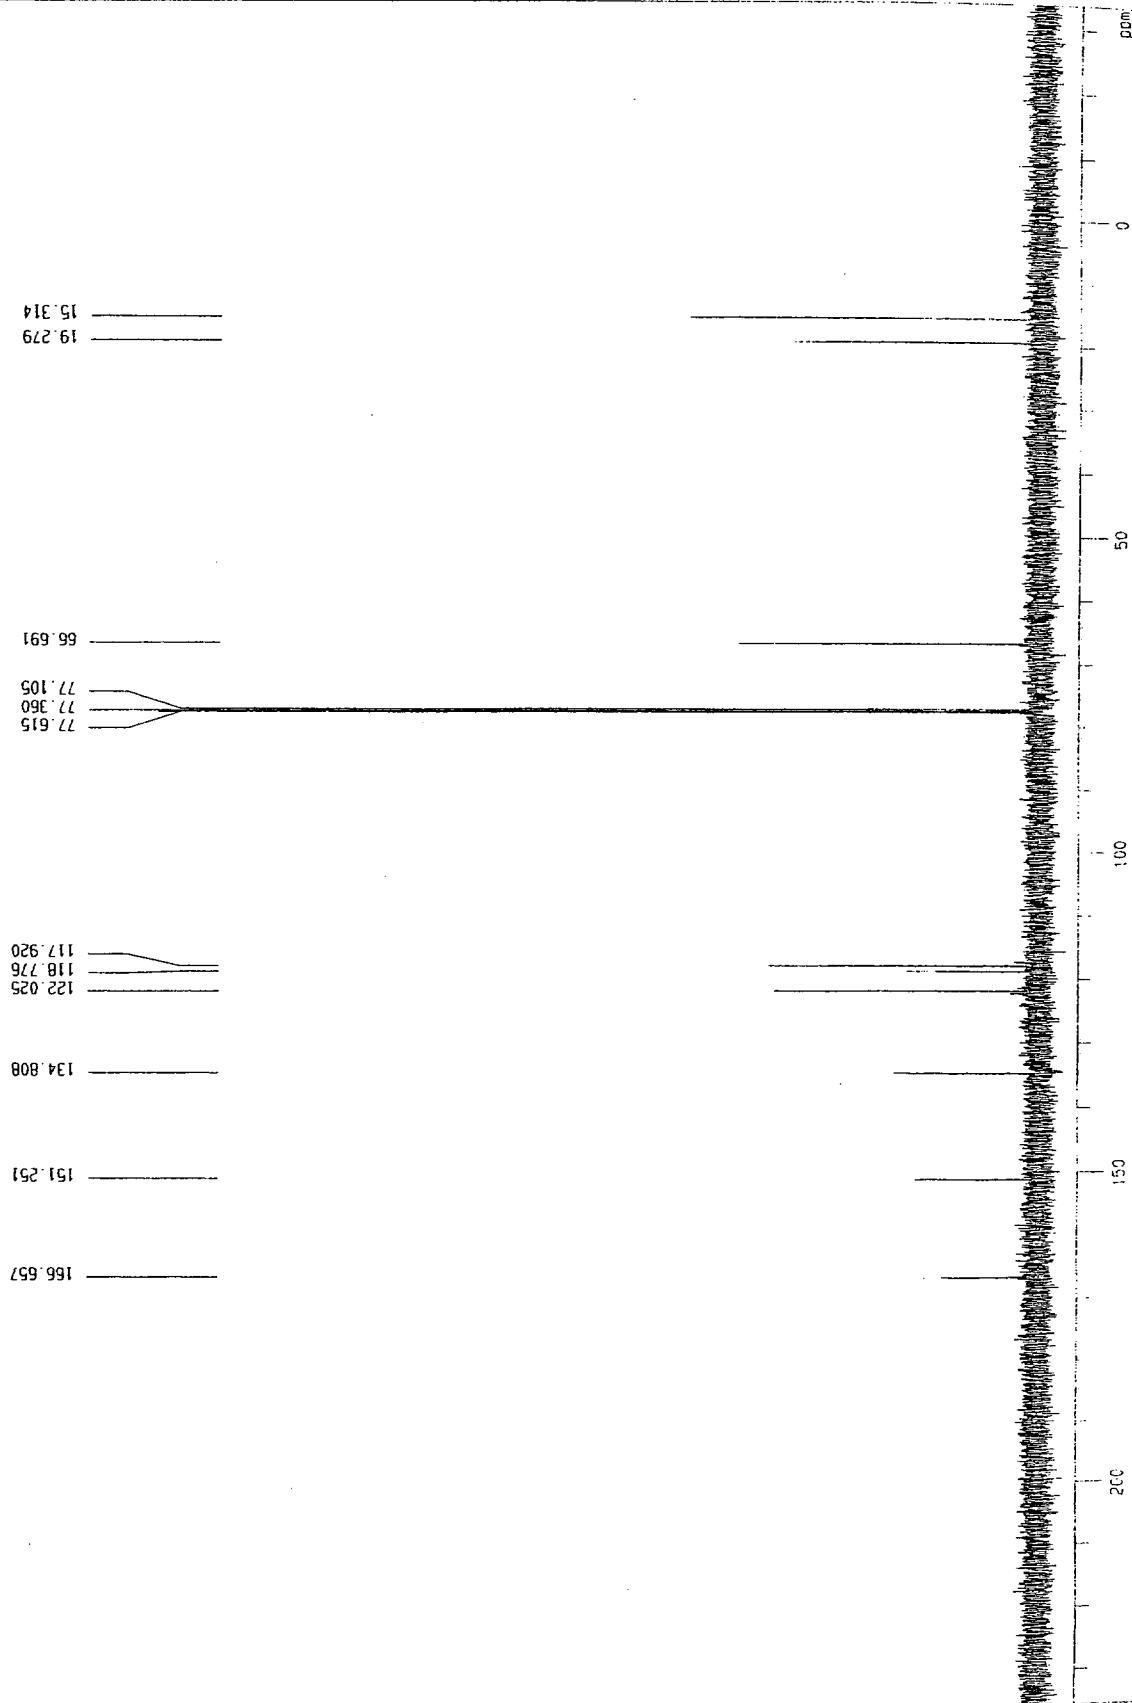

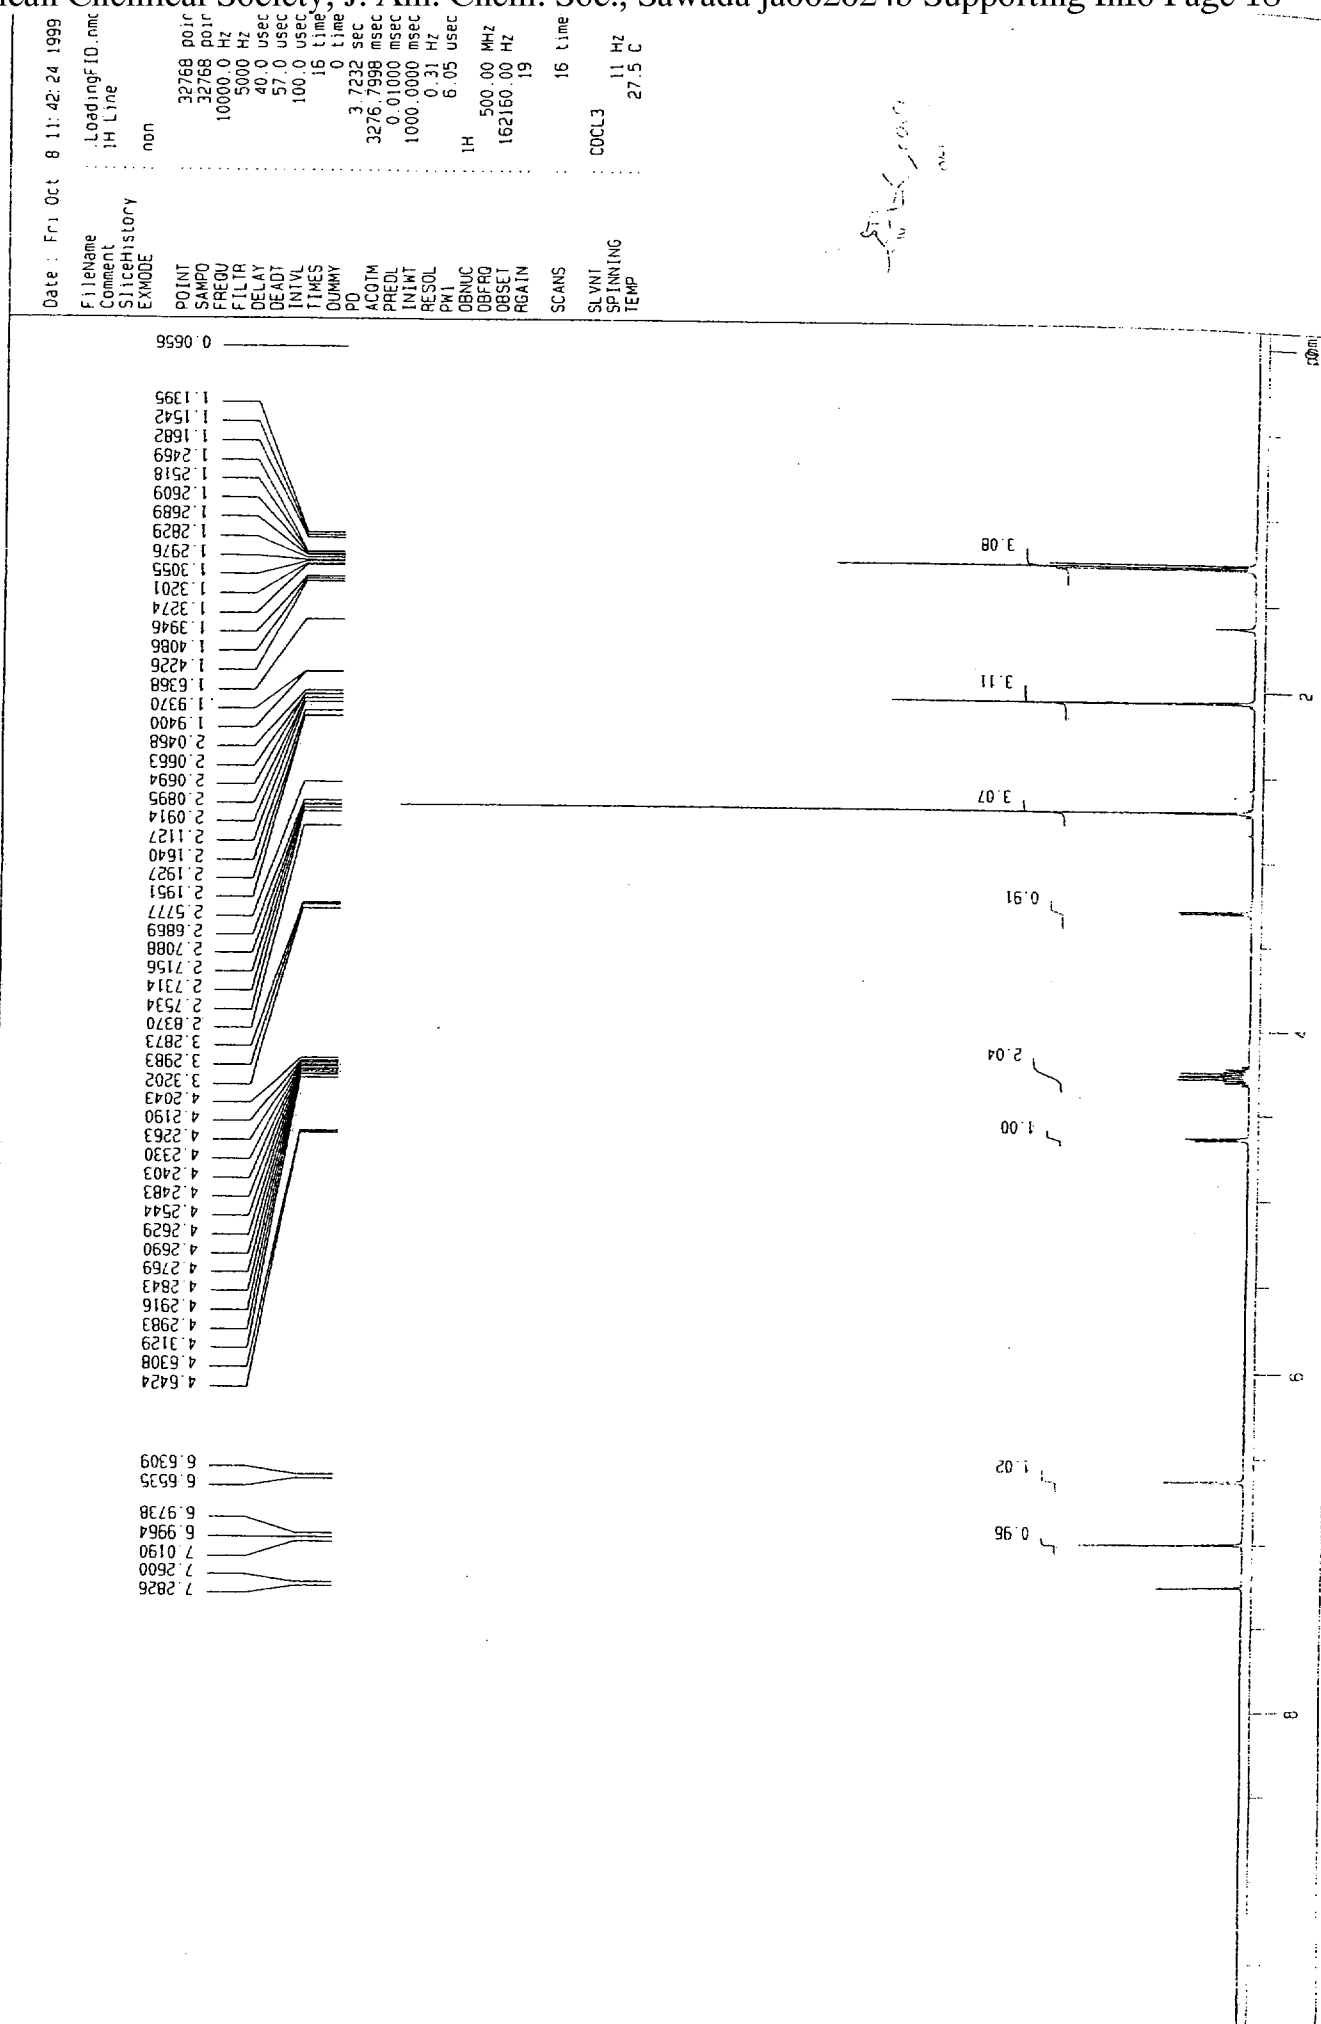

(2R,3E)-Ethyl 2-hydroxy-3-methyl-4-(2-methyl-1,3-thiazol-4-yl)-3-butanoate (20)

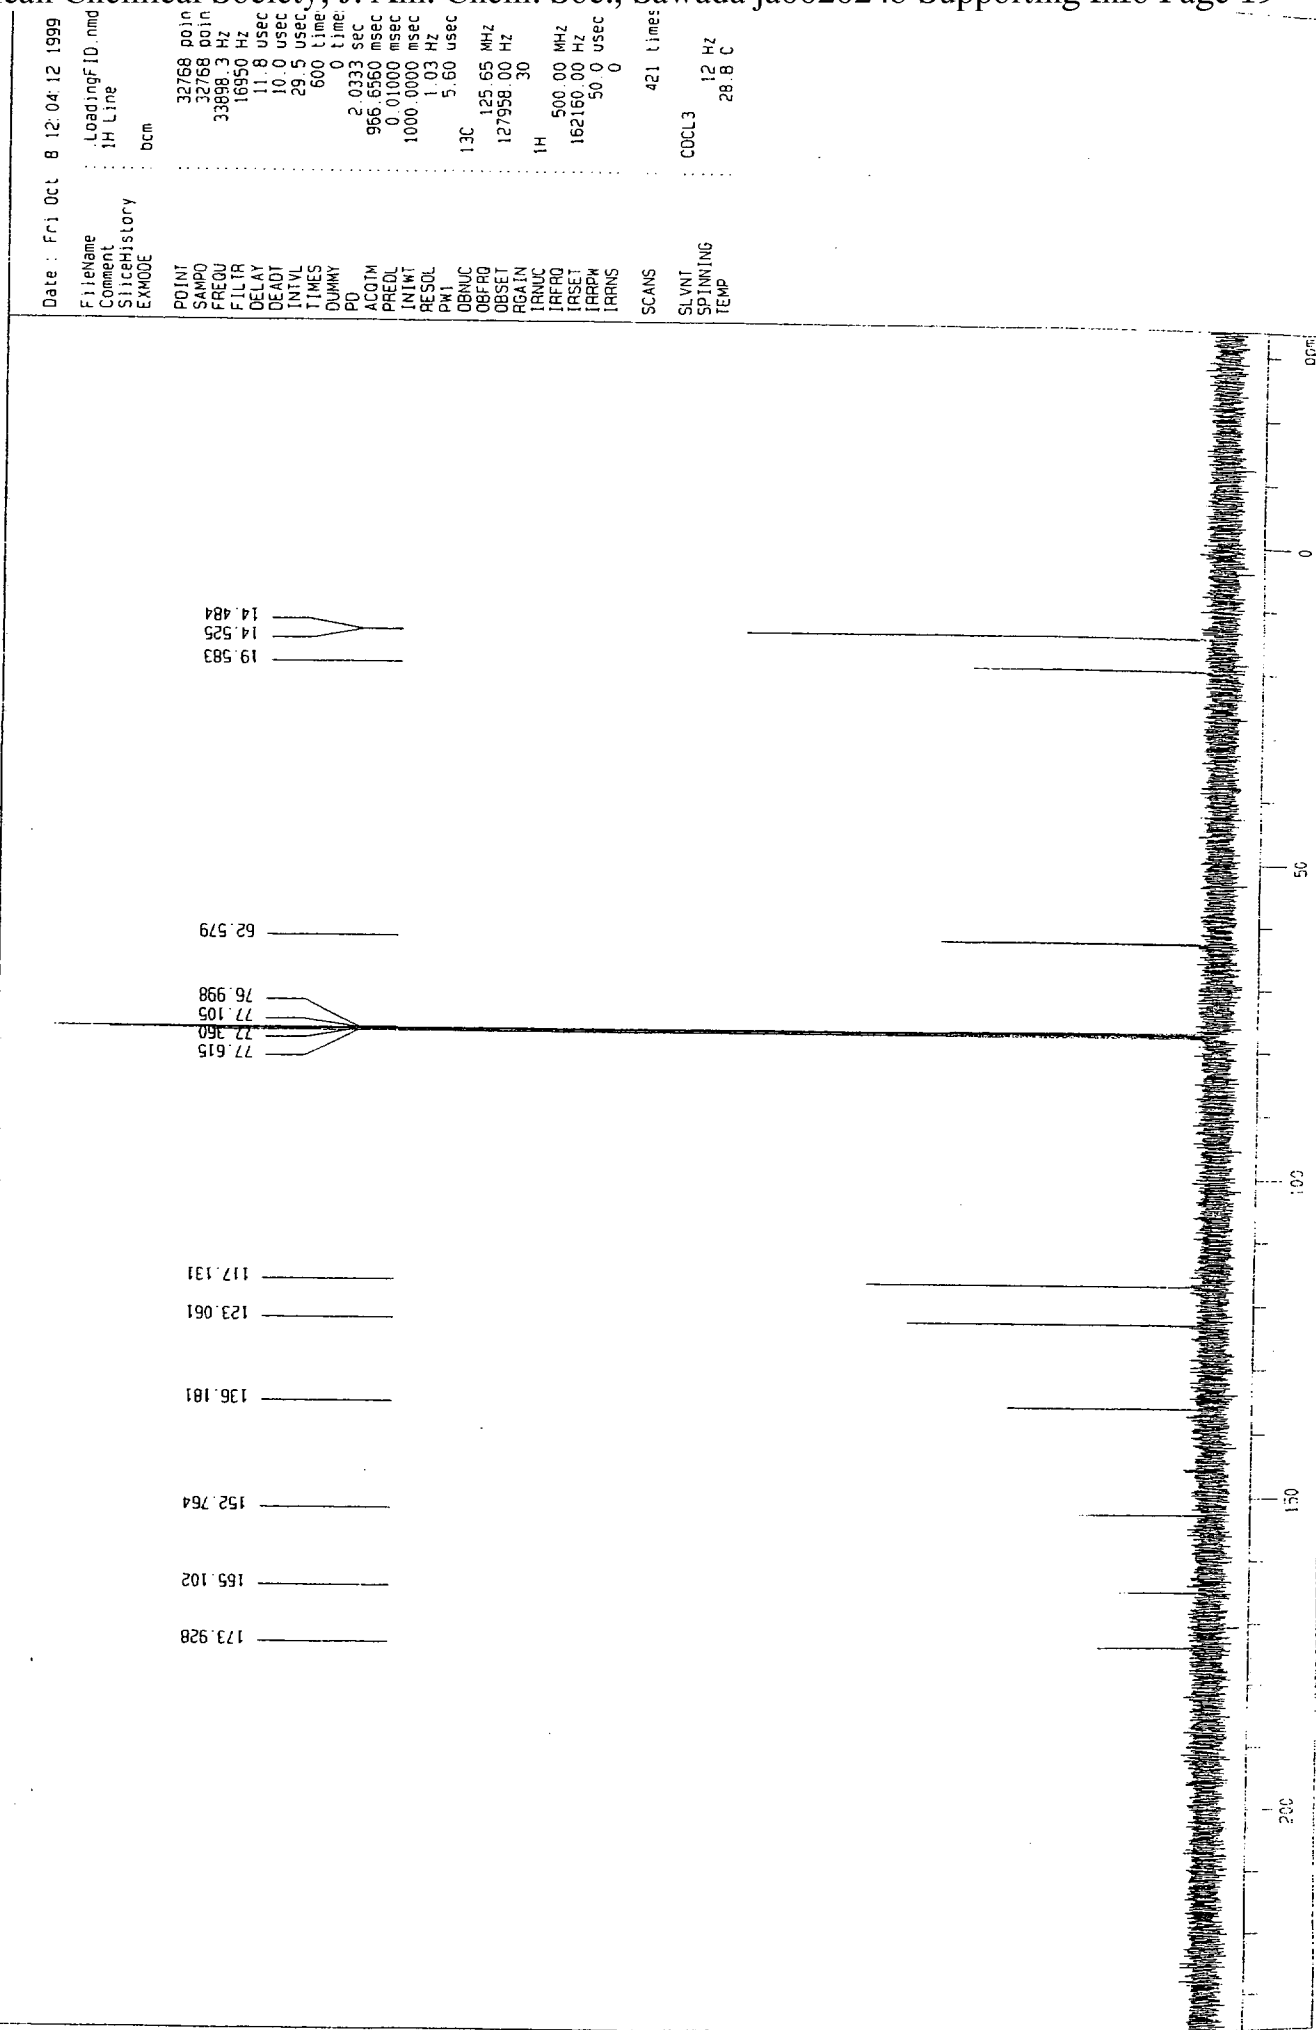

(2*R*,3*E*)-Ethyl 2-(*tert*-Butyldimethylsilyloxy)-3-methyl-4-(2-methyl-1,3-thiazol-4-yl)-3-butenate (21)

Date : Tue Jun 15 11:06:39 1999  
 File Name : Loading ID.n  
 Comment : 1H Line  
 Slice History : non  
 EXMODE :  
 POINT : 32768 po  
 SAMP0 : 32768 po  
 FREQU : 10000.0 Hz  
 FILTR : 5000 Hz  
 DELAY : 40.0 us  
 DEACT : 57.0 us  
 INVTL : 100.0 us  
 TIMES : 8 t1r  
 DUMMY : 0 t1r  
 PO : 3 7232 set  
 ACQIM : 3276.7998 mst  
 PREDL : 0.01000 mst  
 INIWT : 1000.0000 mst  
 RESOL : 0.31 Hz  
 PW1 : 6.05 use  
 1H : 500.00 MHz  
 162160.00 Hz  
 16  
 SCANS : 8 t1r  
 SLVNT : COCL3  
 SPINNING : 11 Hz  
 TEMP : 28.3 C

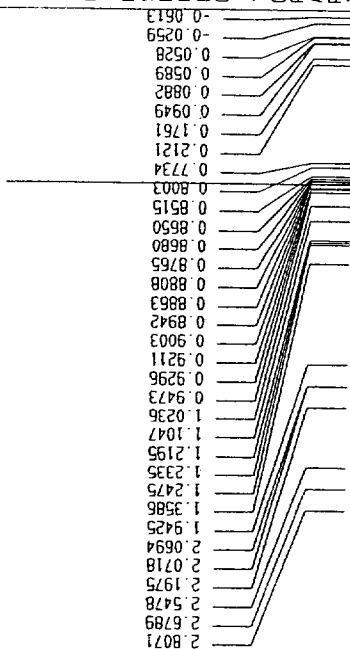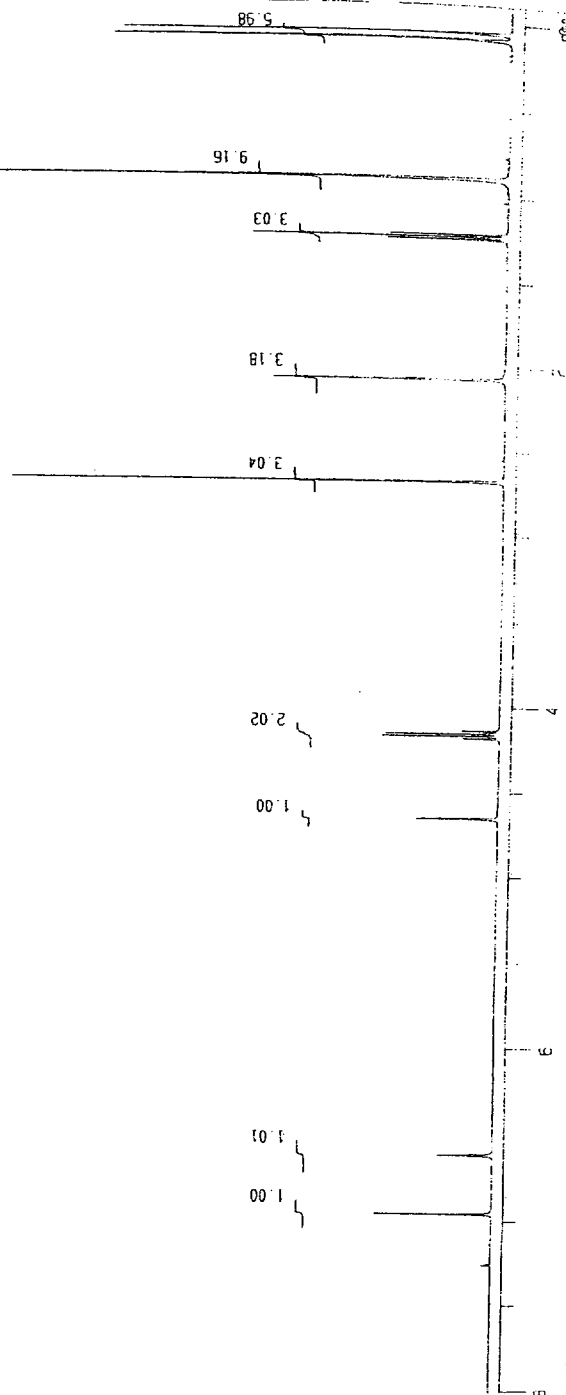

(2R,3E)-Ethyl 2-(*tert*-Butyldimethylsilyloxy)-3-methyl-4-(2-methyl-1,3-thiazol-4-yl)-3-butenolate (21)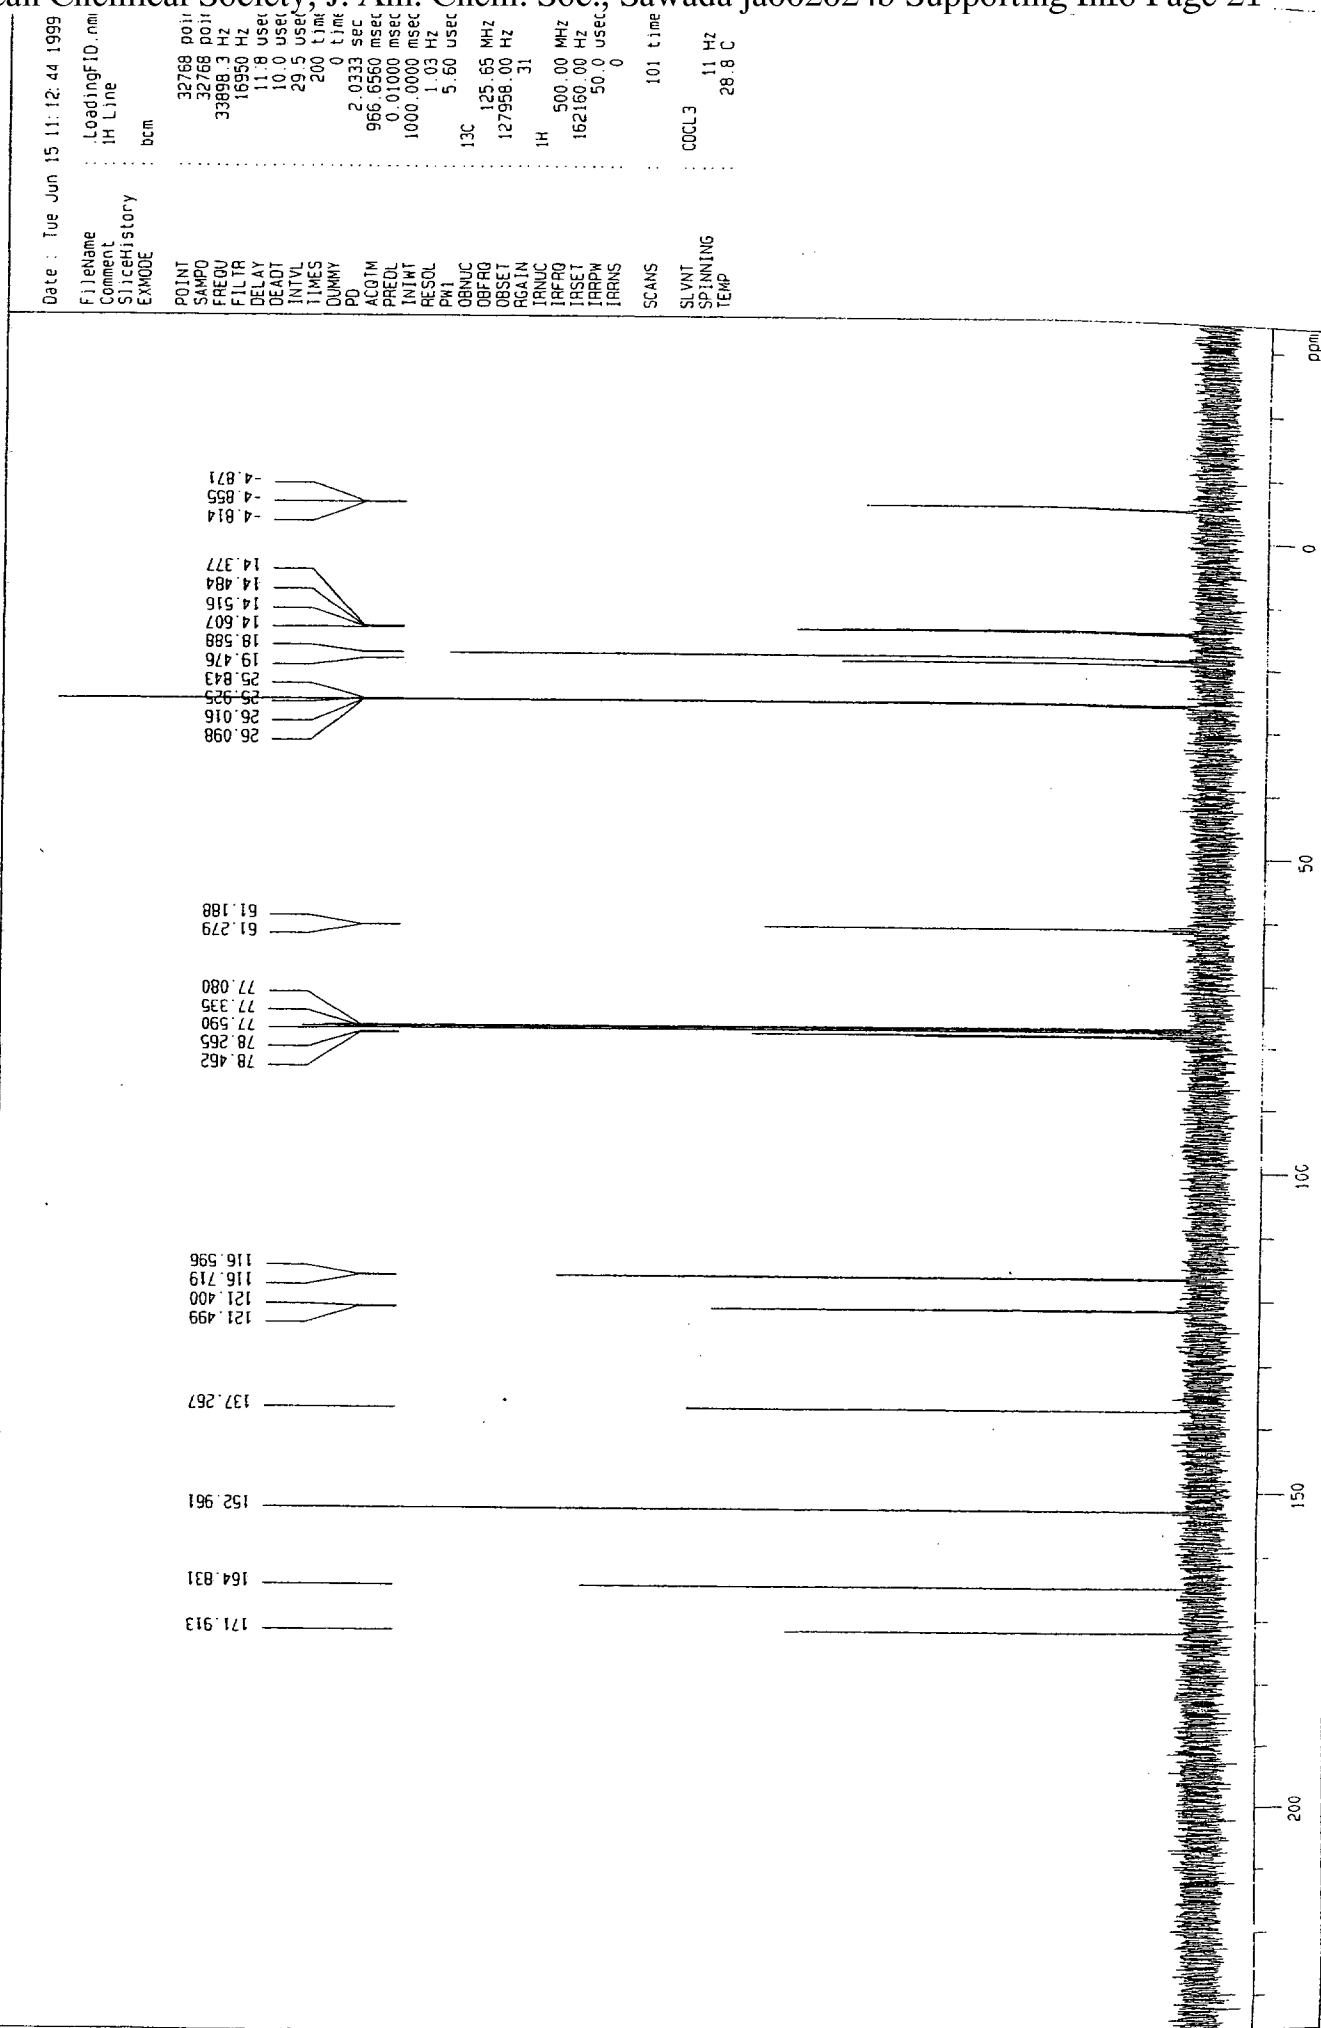

(2R,3E)- 2-(*tert*-Butyldimethylsilyloxy)-3-methyl-4-(2-methyl-1,3-thiazol-4-yl)-3-butenal (5)

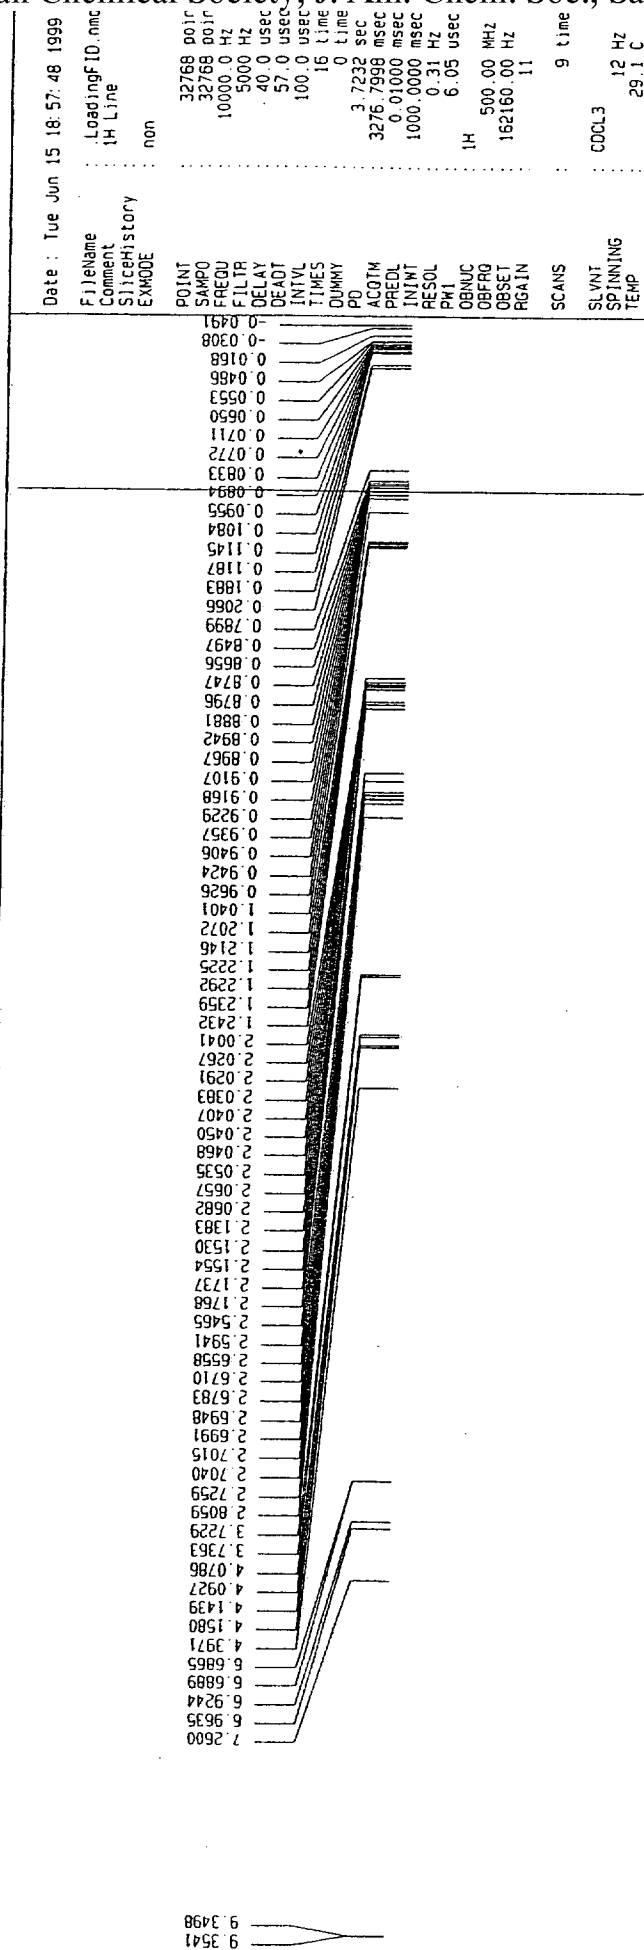

(2R,3E)- 2-(*tert*-Butyldimethylsilyloxy)-3-methyl-4-(2-methyl-1,3-thiazol-4-yl)-3-butenal (5)

Date : Tue Jun 15 19:04:04 1999  
FileName : .LoadingF10.nm  
Comment : 1H Line  
SliceHistory : bcn  
EXMODE :  
POINT 32768 poi  
SAMPD 32768 poi  
FREQU 33998.3 Hz  
FILTR 16950 Hz  
DELAY 11.8 use  
DEADT 10.0 use  
INTVL 29.5 use  
TIMES 200 tim  
DUMMY 0 tim  
PU 2.0333 sec  
ACQTM 966.6560 msec  
PREDL 0.01000 msec  
ININT 1000.0000 msec  
RESOL 1.03 Hz  
PWI 5.60 use  
OBNUC 13C  
OBFRO 125.65 MHz  
OBSET 127958.00 Hz  
RGAIN 29  
IRNUC 1H  
IRFRO 500.00 MHz  
IRSET 162160.00 Hz  
IRPW 50.0 usec  
IRMS 0  
SCANS 110 time  
SLVNT COCL3  
SPINNT 11 Hz  
TEMP 29.6 C

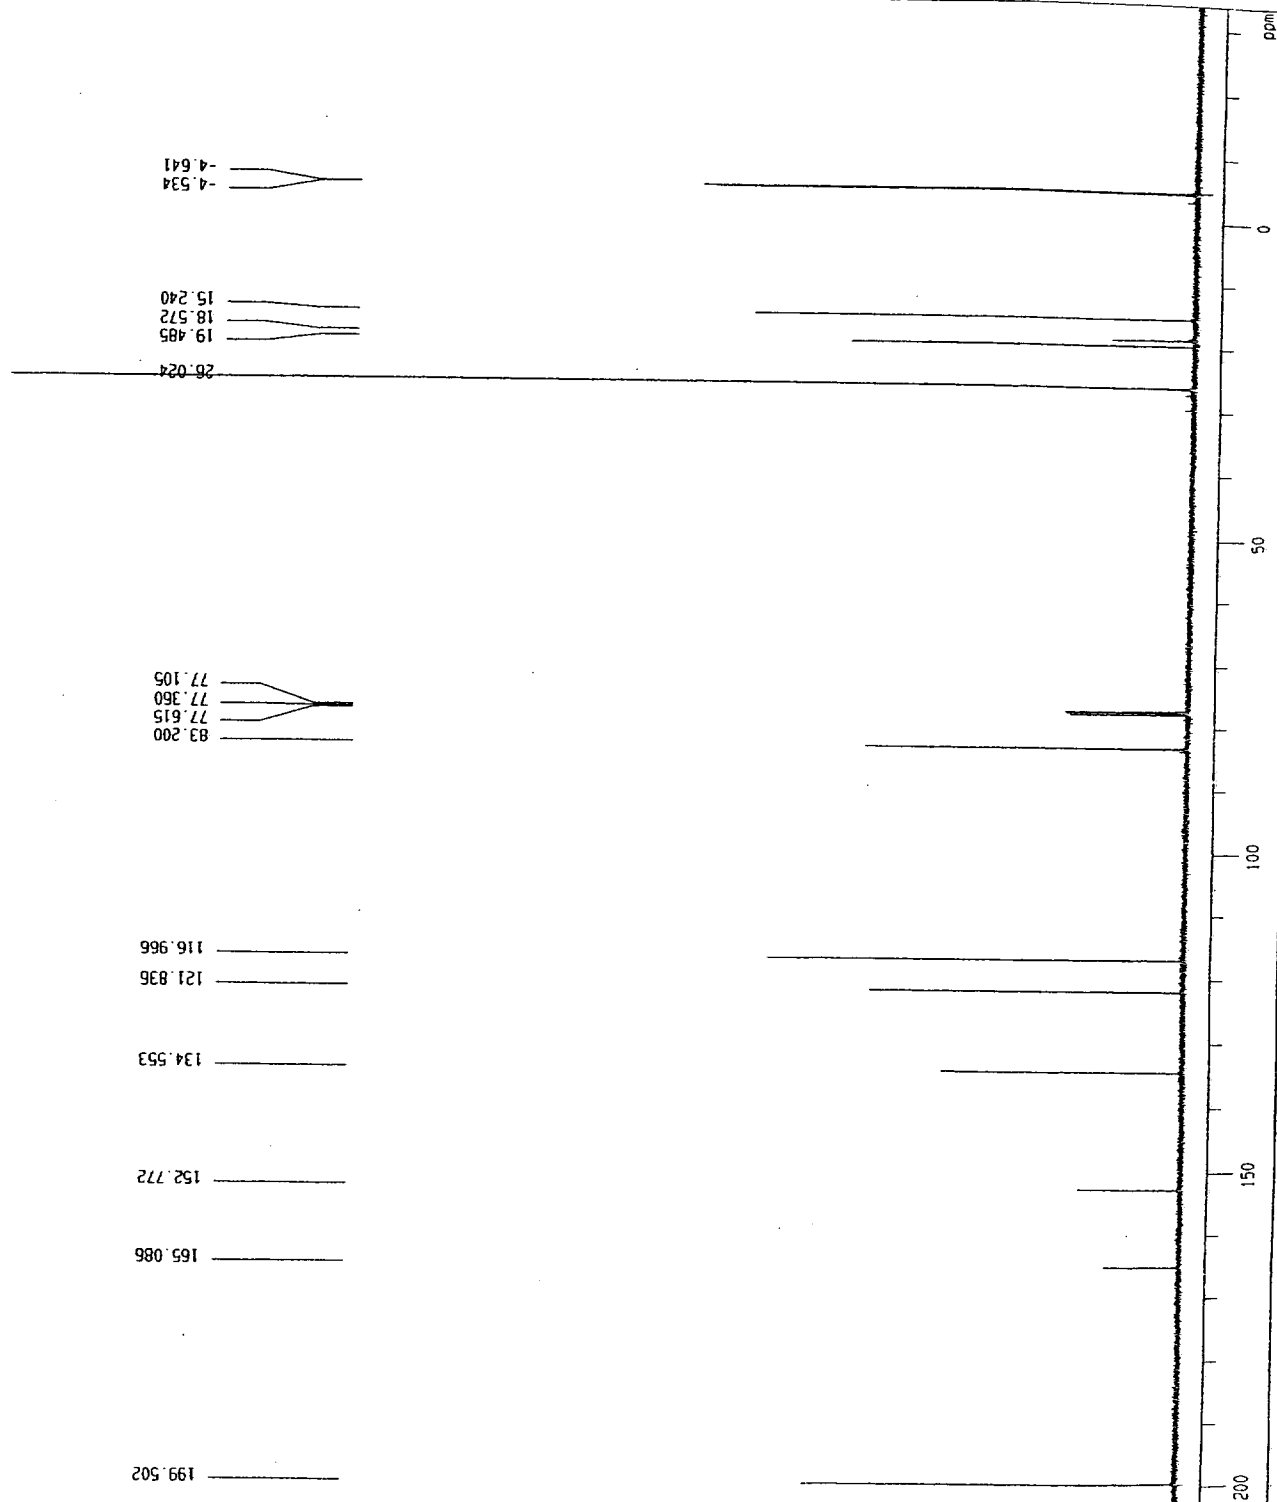

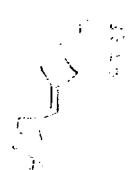



(1*E*,3*S*)-3-(*tert*-Butyldimethylsilyloxy)-2-methyl-6-trimethylsilyl-1-(2-methyl-1,3-thiazol-4-yl)-1-hexen-5-  
yne (23)

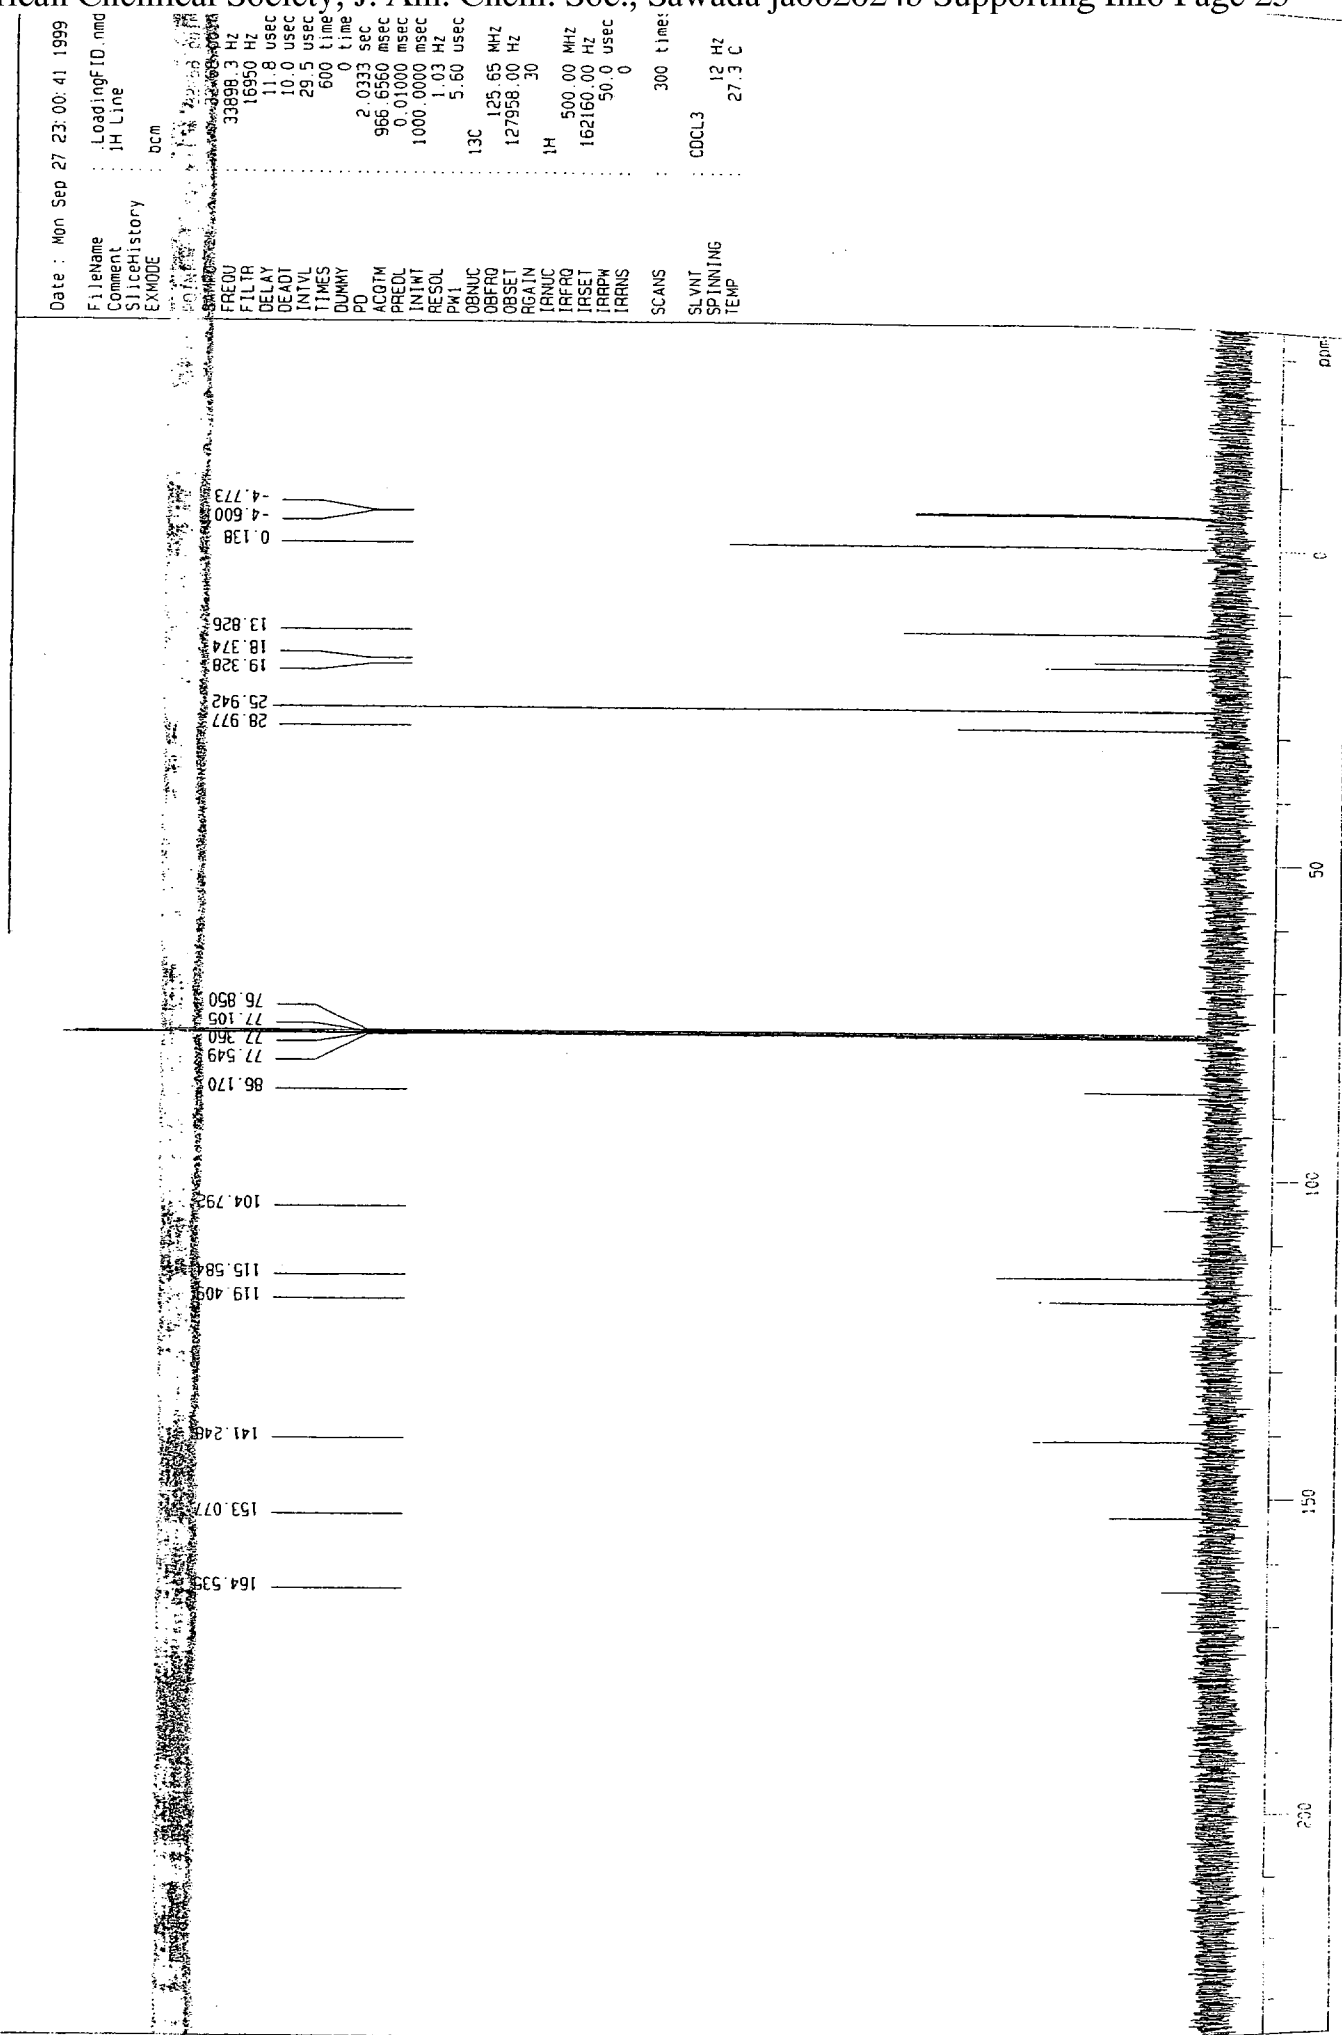

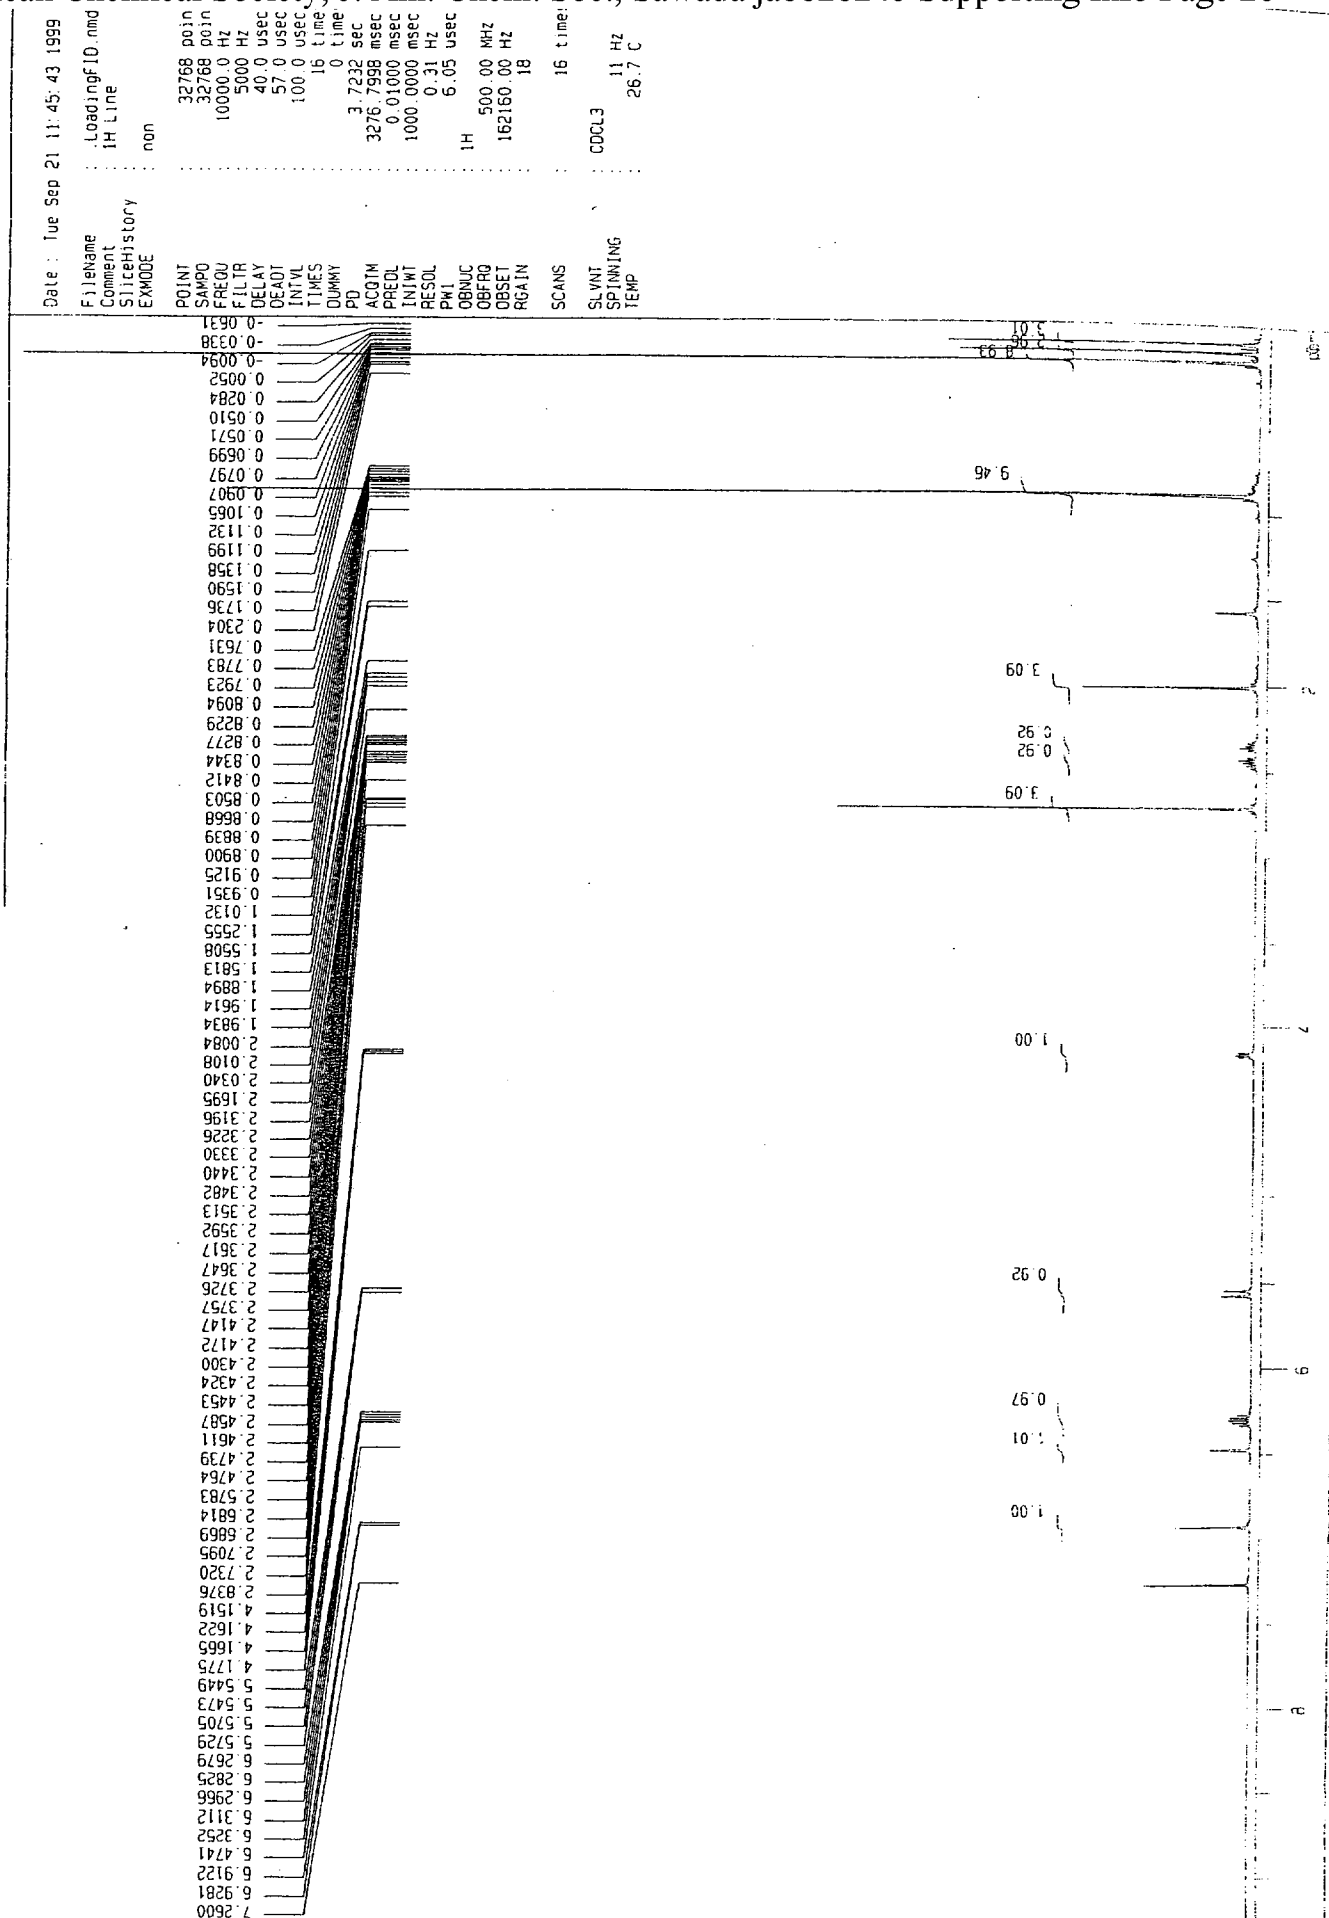

(1E,3S,5Z)-3-(*tert*-Butyldimethylsilyloxy)-2-methyl-6-trimethylsilyl-1-(2-methyl-1,3-thiazol-4-yl)-1,5-hexadiene (24)

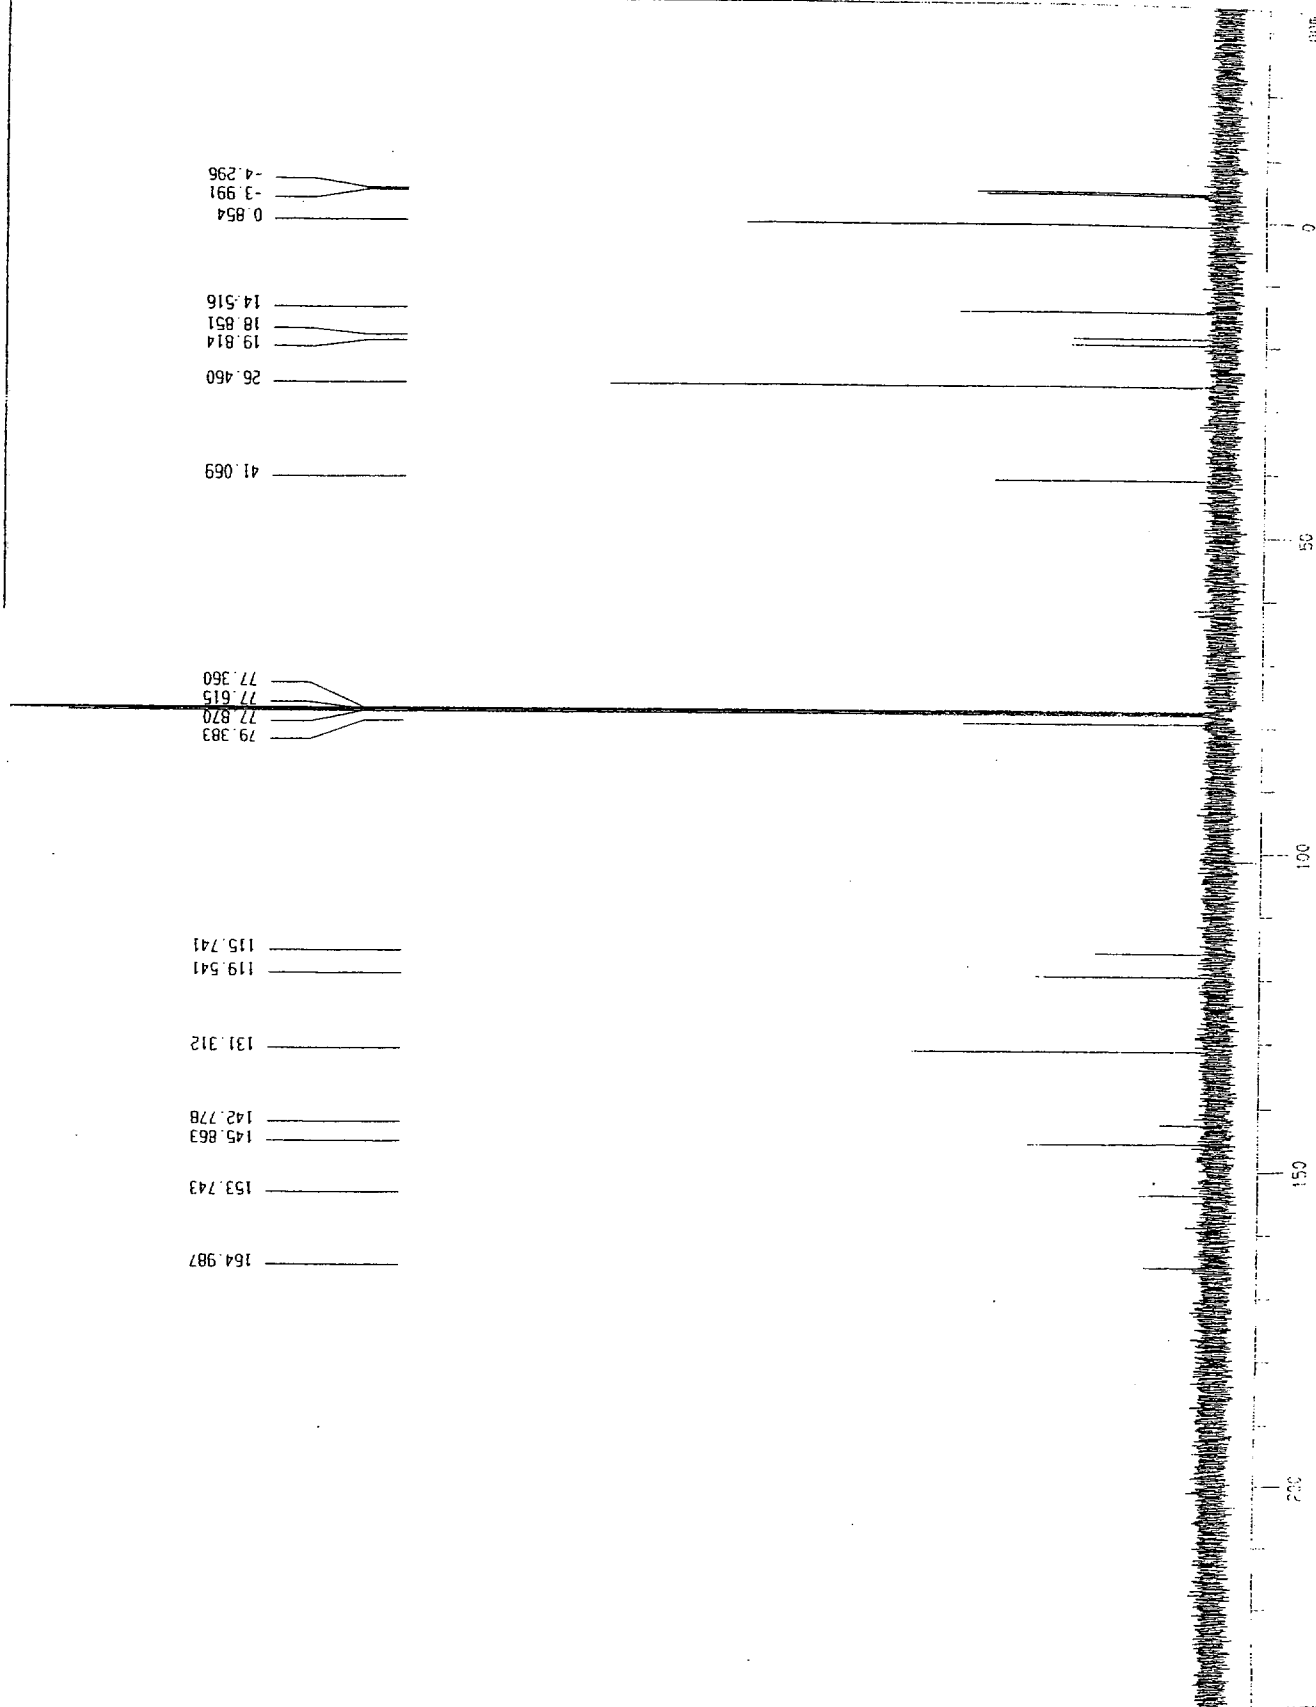

Date : Tue Sep 21 12:07:04 1999  
 FileName : Loadingf10.ndd  
 Comment : 1H Line  
 SliceHistory : bcm  
 EXMODE :  
 POINT : 32768 point  
 SAMPD : 32768 point  
 FREQD : 33898.3 Hz  
 FILTR : 16950 Hz  
 DELAY : 11.8 usec  
 DEACT : 10.0 usec  
 INTRV : 29.5 usec  
 TIMES : 600 time  
 DUMMY : 0 time  
 PD : 2.0333 sec  
 ACQTM : 966.6560 msec  
 PREOL : 0.01000 msec  
 INTRV : 1000.0000 msec  
 RESOL : 1.03 Hz  
 PW1 : 5.60 usec  
 13C : 125.65 MHz  
 127958.00 Hz  
 30  
 1H : 500.00 MHz  
 162160.00 Hz  
 50.0 usec  
 0  
 SCANS : 412 time  
 SLVNT : CDCL3  
 SPINNING : 10 Hz  
 TEMP : 28.2 C

(1E,3S,5Z)-2-Methyl-6-trimethylsilyl-1-(2-methyl-1,3-thiazol-4-yl)-1,5-hexadiene-3-ol (25)

Date : Mon Sep 20 23:10:35 1999  
 FileName : Loadingf10.nmc  
 Comment : 1H Line  
 SliceHistory : non  
 EXMODE :  
 POINT : 32768 point  
 SAMPD : 32768 point  
 FREQD : 10000.0 Hz  
 F1TR : 5000 Hz  
 DELAY : 40.0 usec  
 DEADT : 57.0 usec  
 INTVL : 100.0 usec  
 TIMES : 16 time  
 DUMMY : 0 time  
 PD : 3.7232 sec  
 ACQTM : 3276.7998 msec  
 PREDL : 0.01000 msec  
 INIWT : 1000.0000 msec  
 RESOL : 0.31 Hz  
 PH1 : 6.05 usec  
 OBNUC : 1H  
 OBFRQ : 500.00 MHz  
 OBSET : 162160.00 Hz  
 RGAIN : 22  
 SCANS : 16 time  
 SLVNT : CDCL3  
 SPINNING : 11 Hz  
 TEMP : 27.7 C

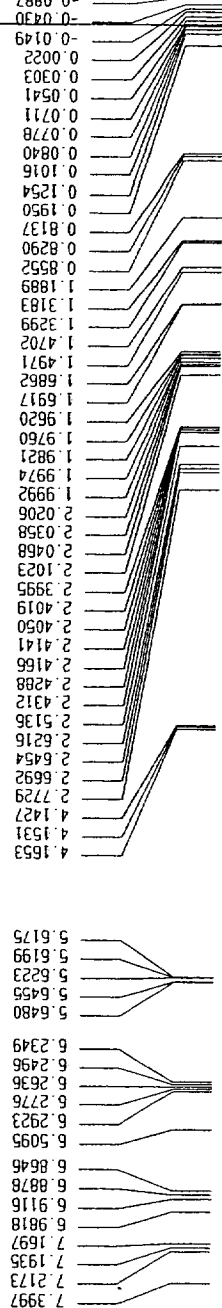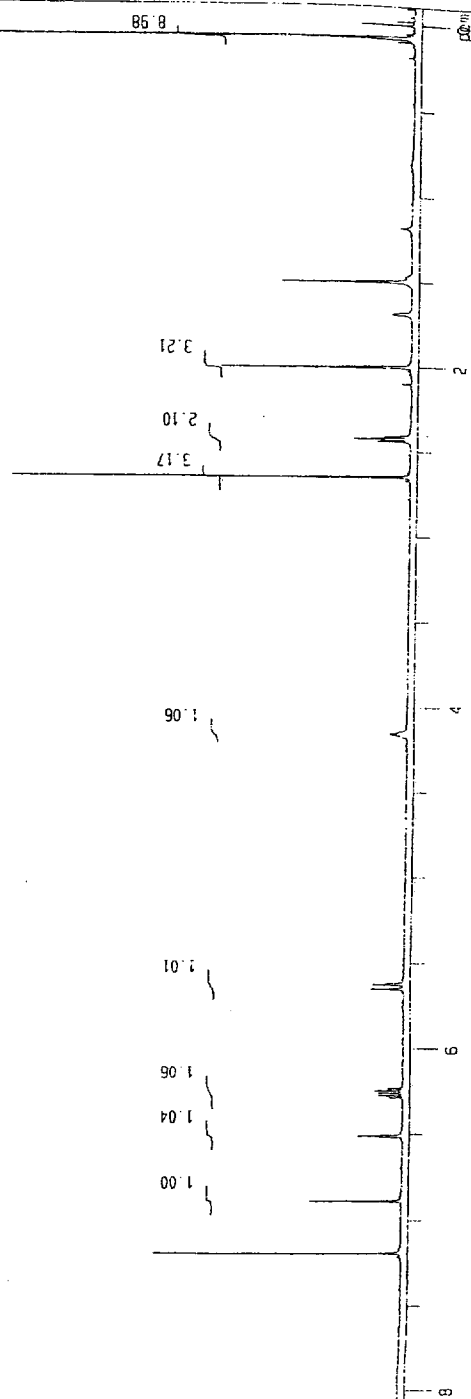

## (1E,3S,5Z)-2-Methyl-6-trimethylsilyl-1-(2-methyl-1,3-thiazol-4-yl)-1,5-hexadiene-3-ol (25)

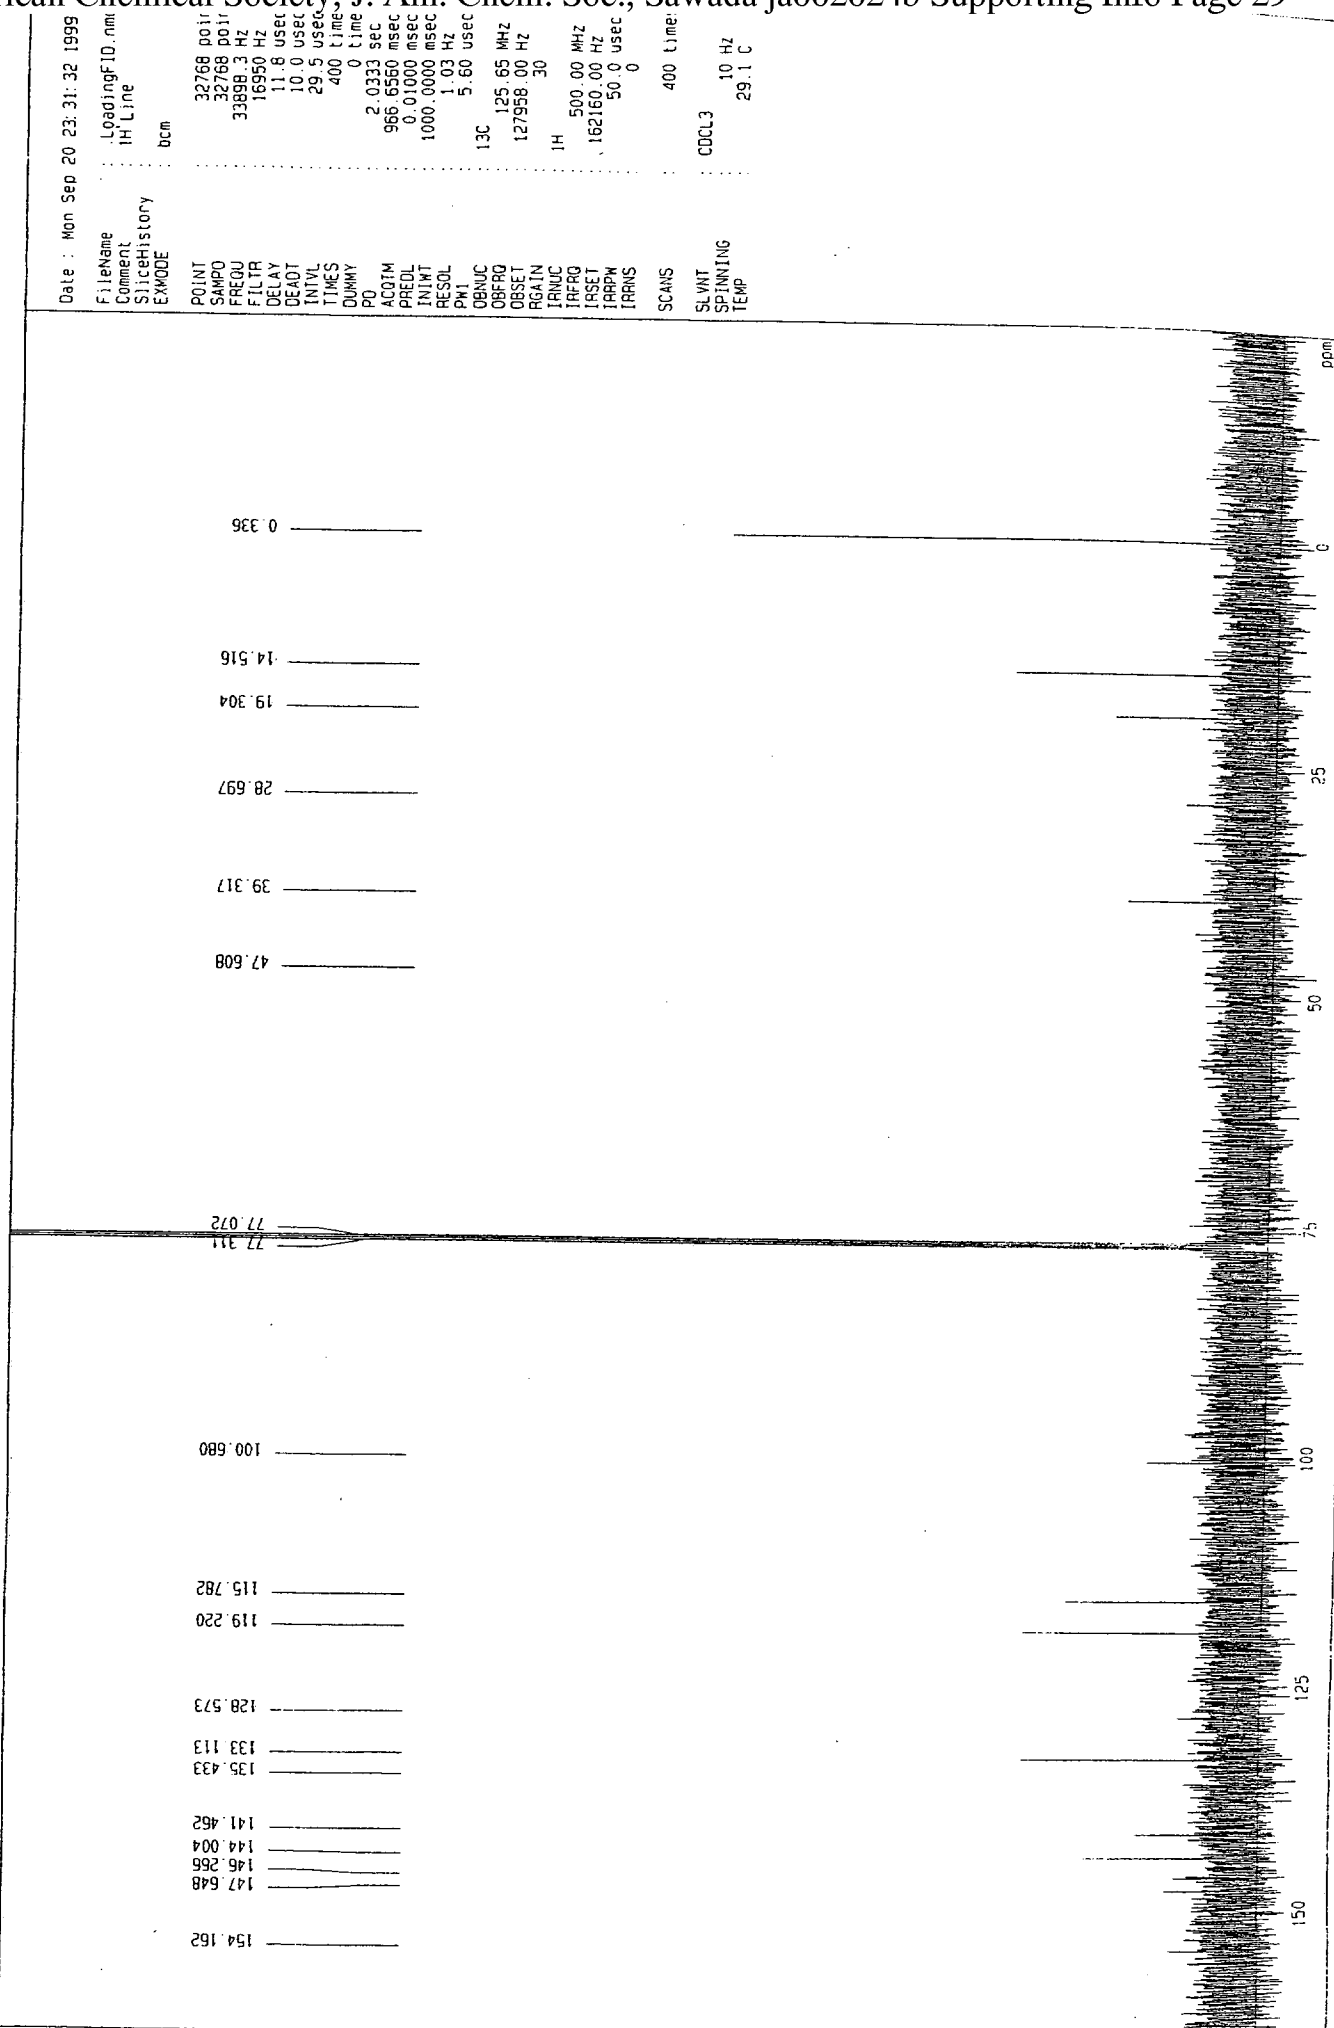

(1E,3S,5Z)-2-Methyl-6-iodo-1-(2-methyl-1,3-thiazol-4-yl)-1,5-hexadiene-3-ol (26)

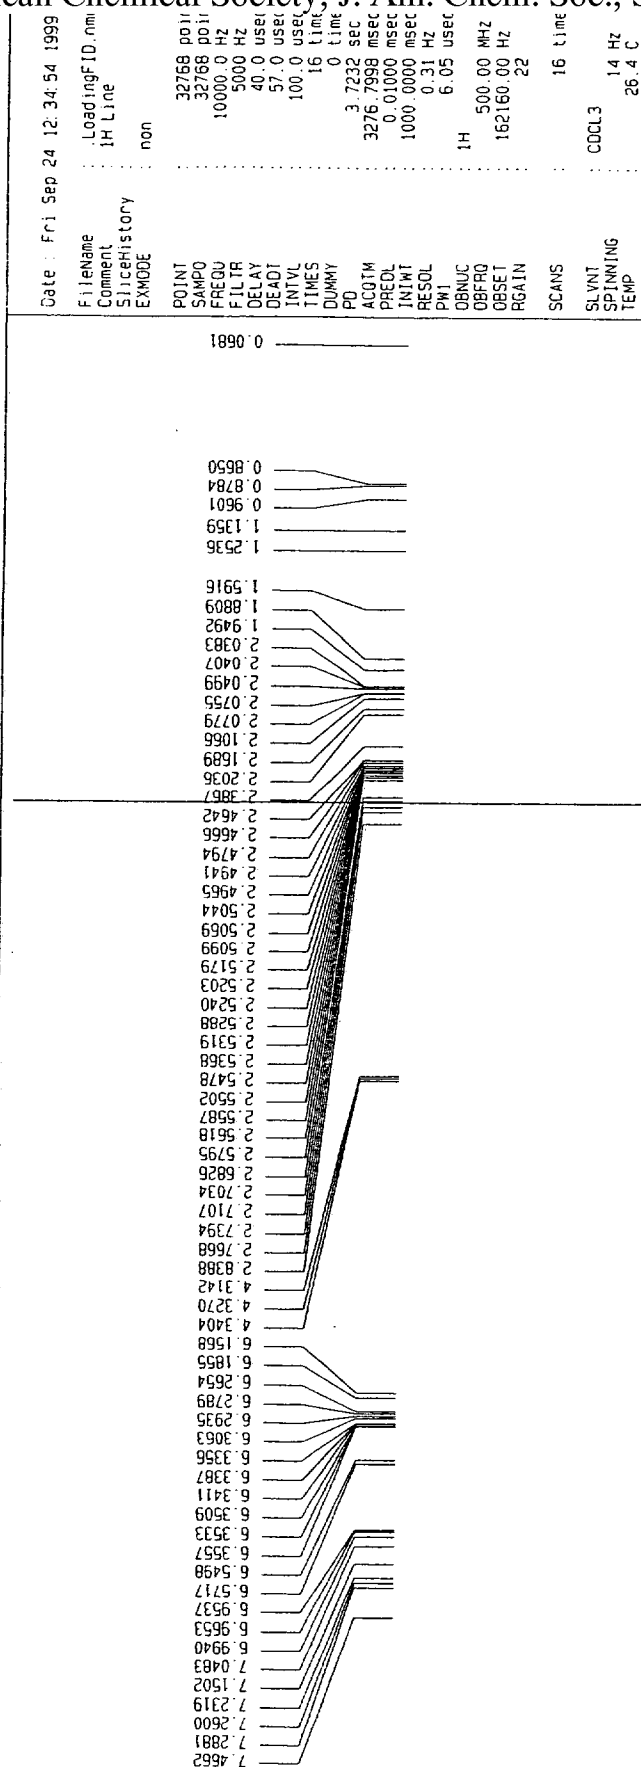

(1E,3S,5Z)-2-Methyl-6-iodo-1-(2-methyl-1,3-thiazol-4-yl)-1,5-hexadiene-3-ol (26)

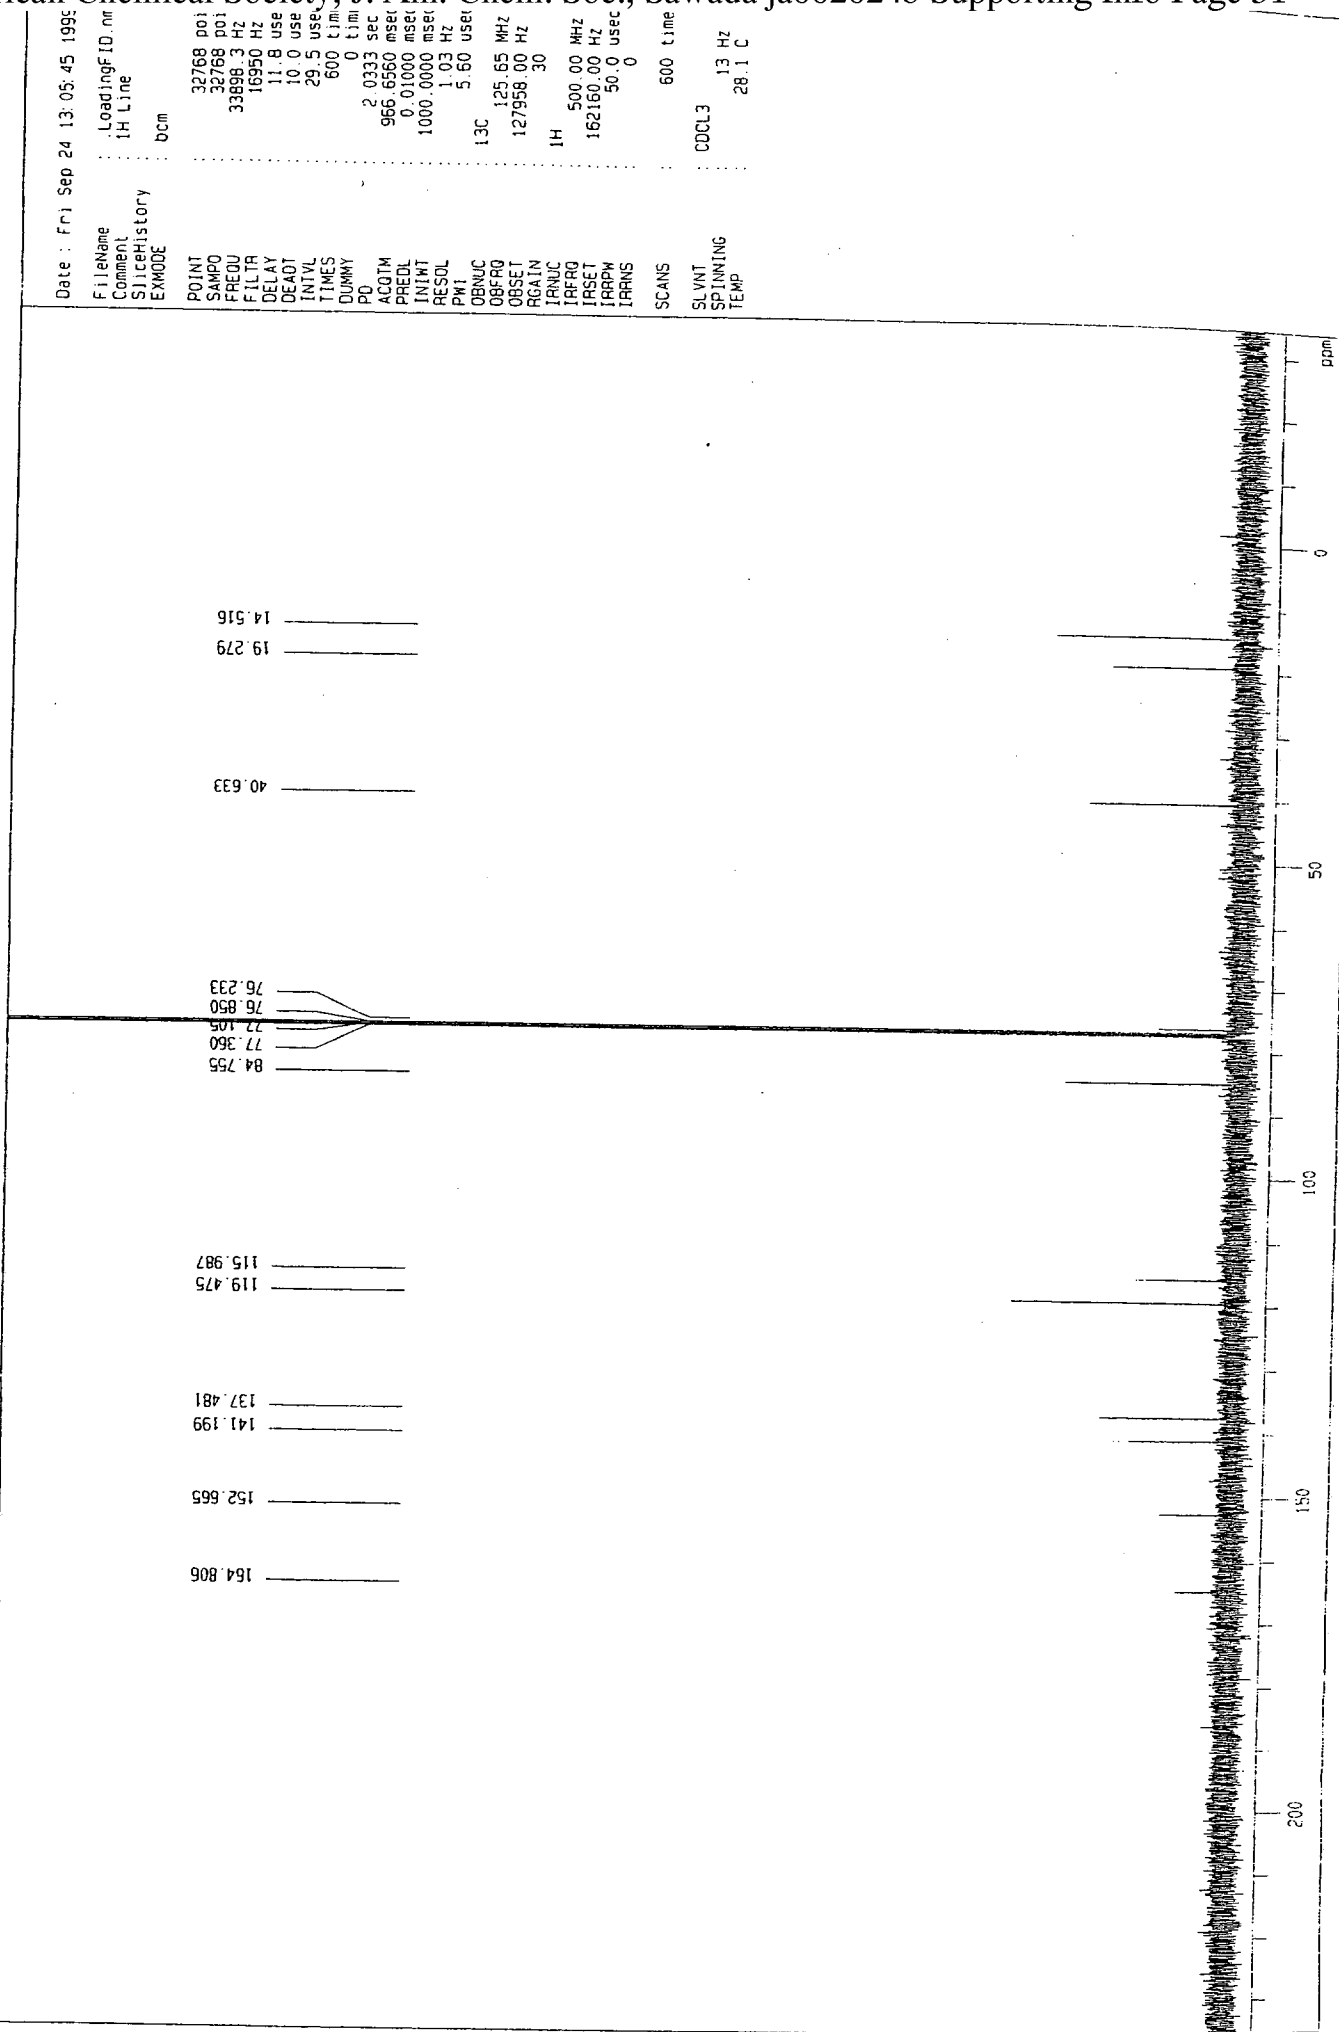

(1E,3S,5Z)-2-Methyl-6-trimethylsilyl-1-(2-methyl-1,3-thiazol-4-yl)-1,5-hexadiene-3-yl acetate (Fragment A)

Date : Wed Oct 6 21:24:03 1999  
 File Name : LoadingID.nm.dat  
 Comment : 1H Line  
 Slice History : non  
 EXMODE :  
 POINT : 32768 points  
 SAMPO : 32768 points  
 FREQ : 10000.0 Hz  
 FTLR : 5000 Hz  
 DELAY : 40.0 usec  
 DEADT : 57.0 usec  
 INVL : 100.0 usec  
 TIMES : 16 times  
 DUMY : 0 times  
 PD : 3.7232 sec  
 ACQTM : 3276.7998 msec  
 PRECL : 0.01000 msec  
 INIWT : 1000.0000 msec  
 RESOL : 0.31 Hz  
 PW1 : 6.05 usec  
 DBNUC : 500.00 MHz  
 DBFRQ : 162160.00 Hz  
 OBSET : 20  
 RGAIN :  
 SCANS : 16 times  
 SLVNT : CDCL3  
 SPINNING : 14 Hz  
 TEMP : 27.3 C

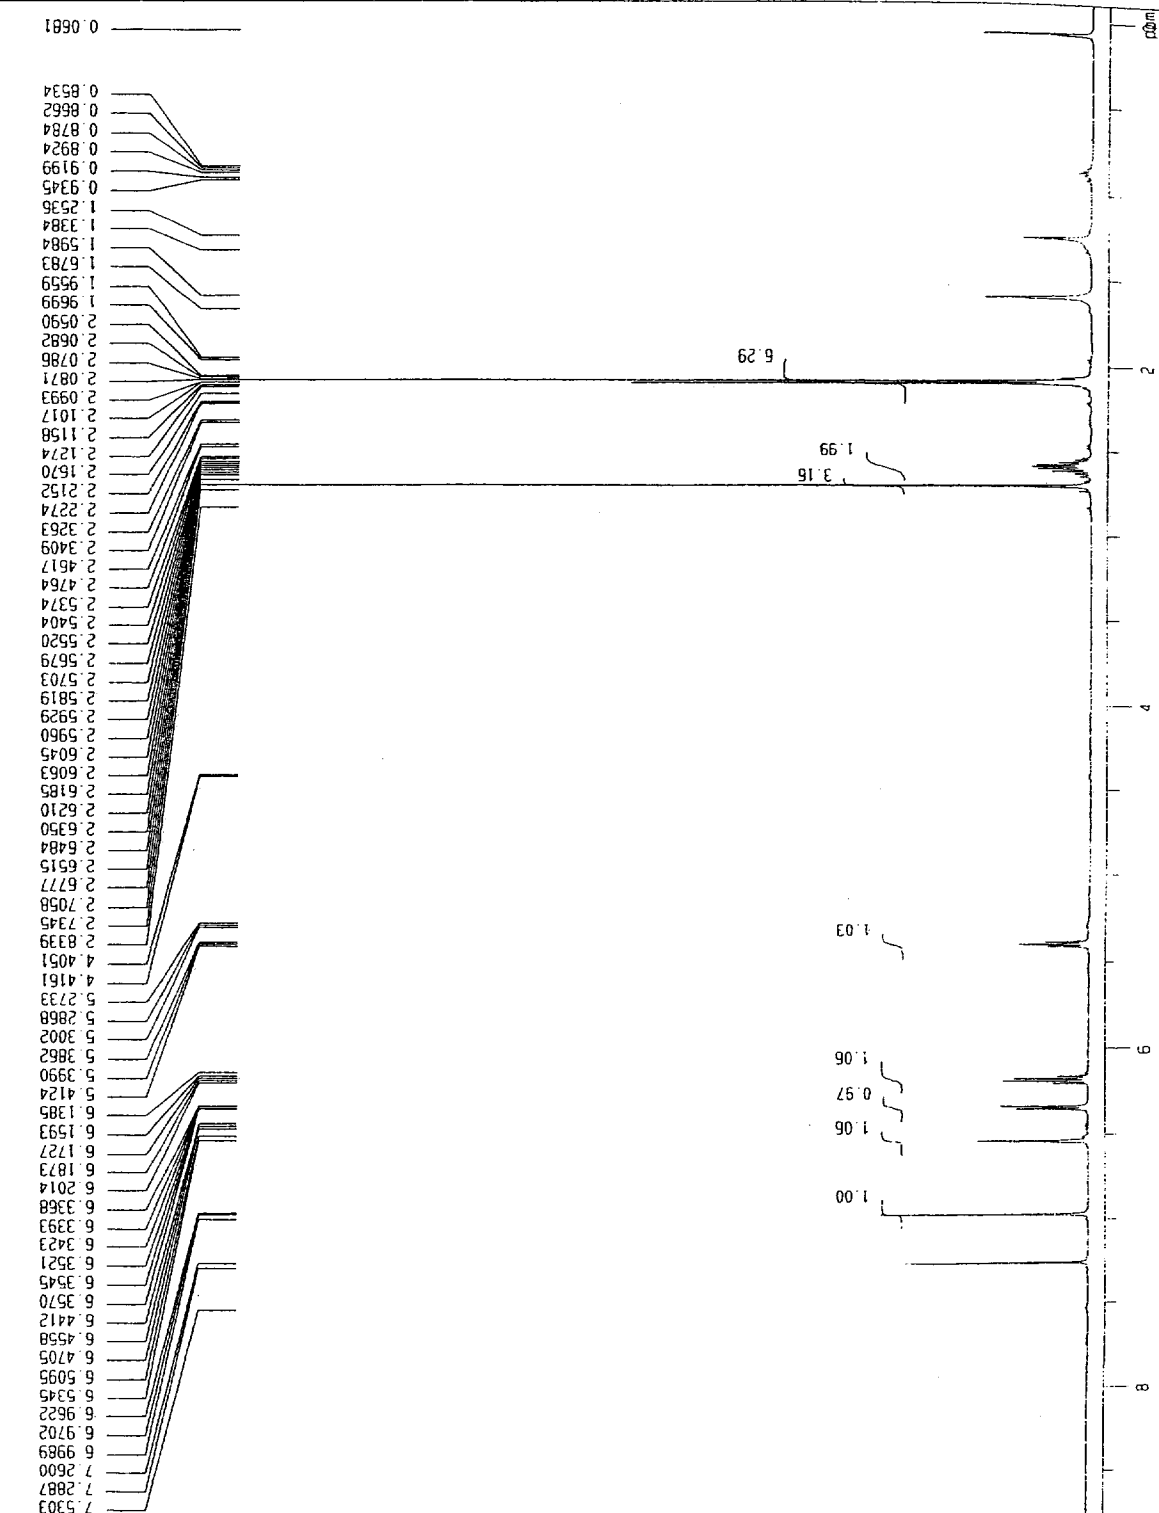



(1E,3S,5Z)-2-Methyl-6-trimethylsilyl-1-(2-methyl-1,3-thiazol-4-yl)-1,5-hexadiene-3-yl acetate (Fragment A)

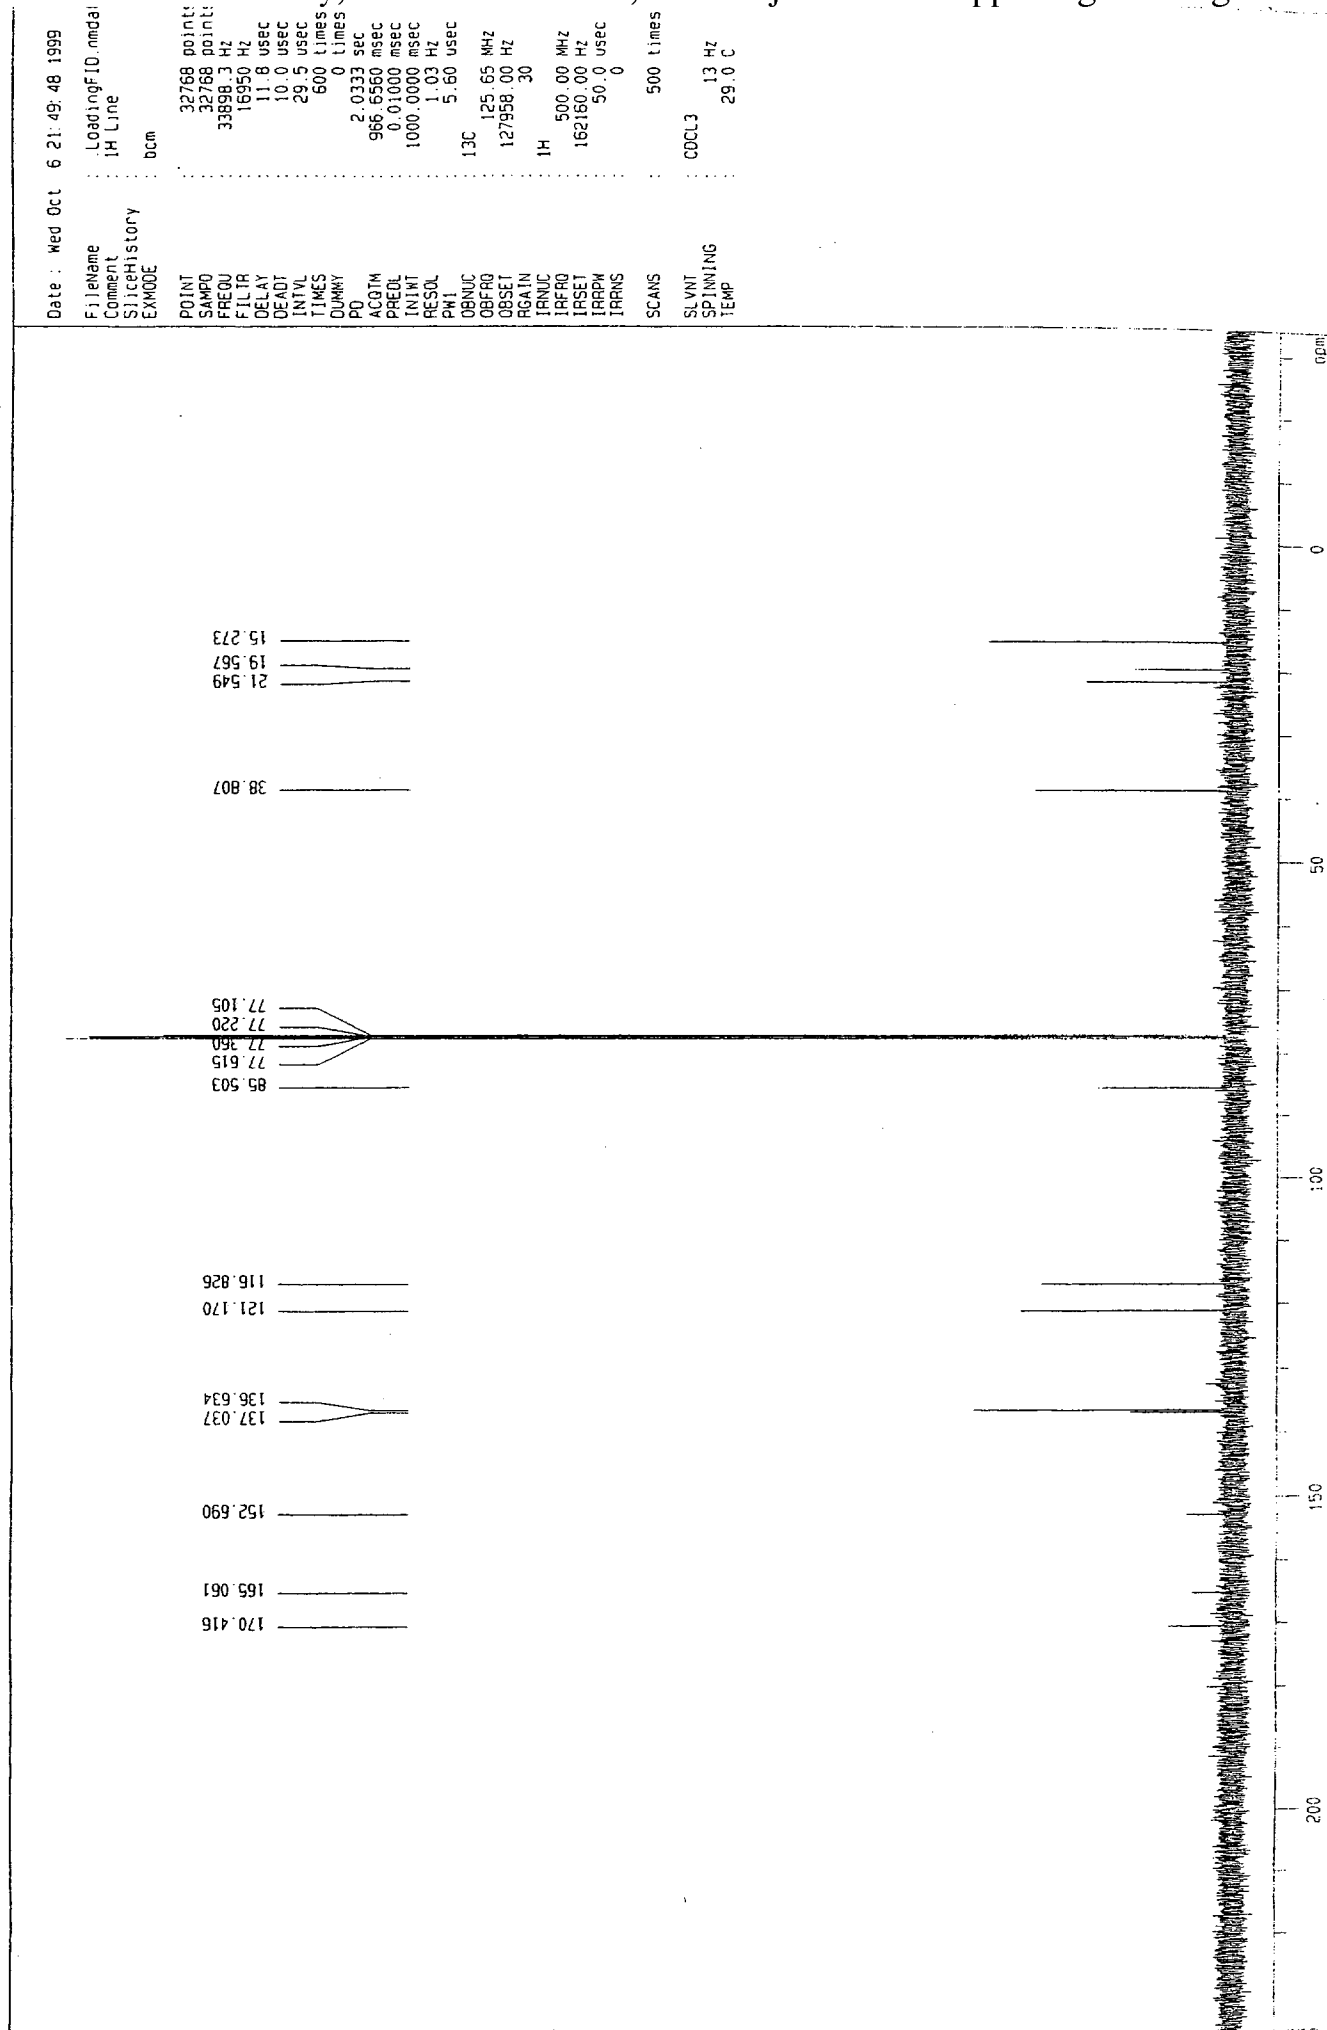

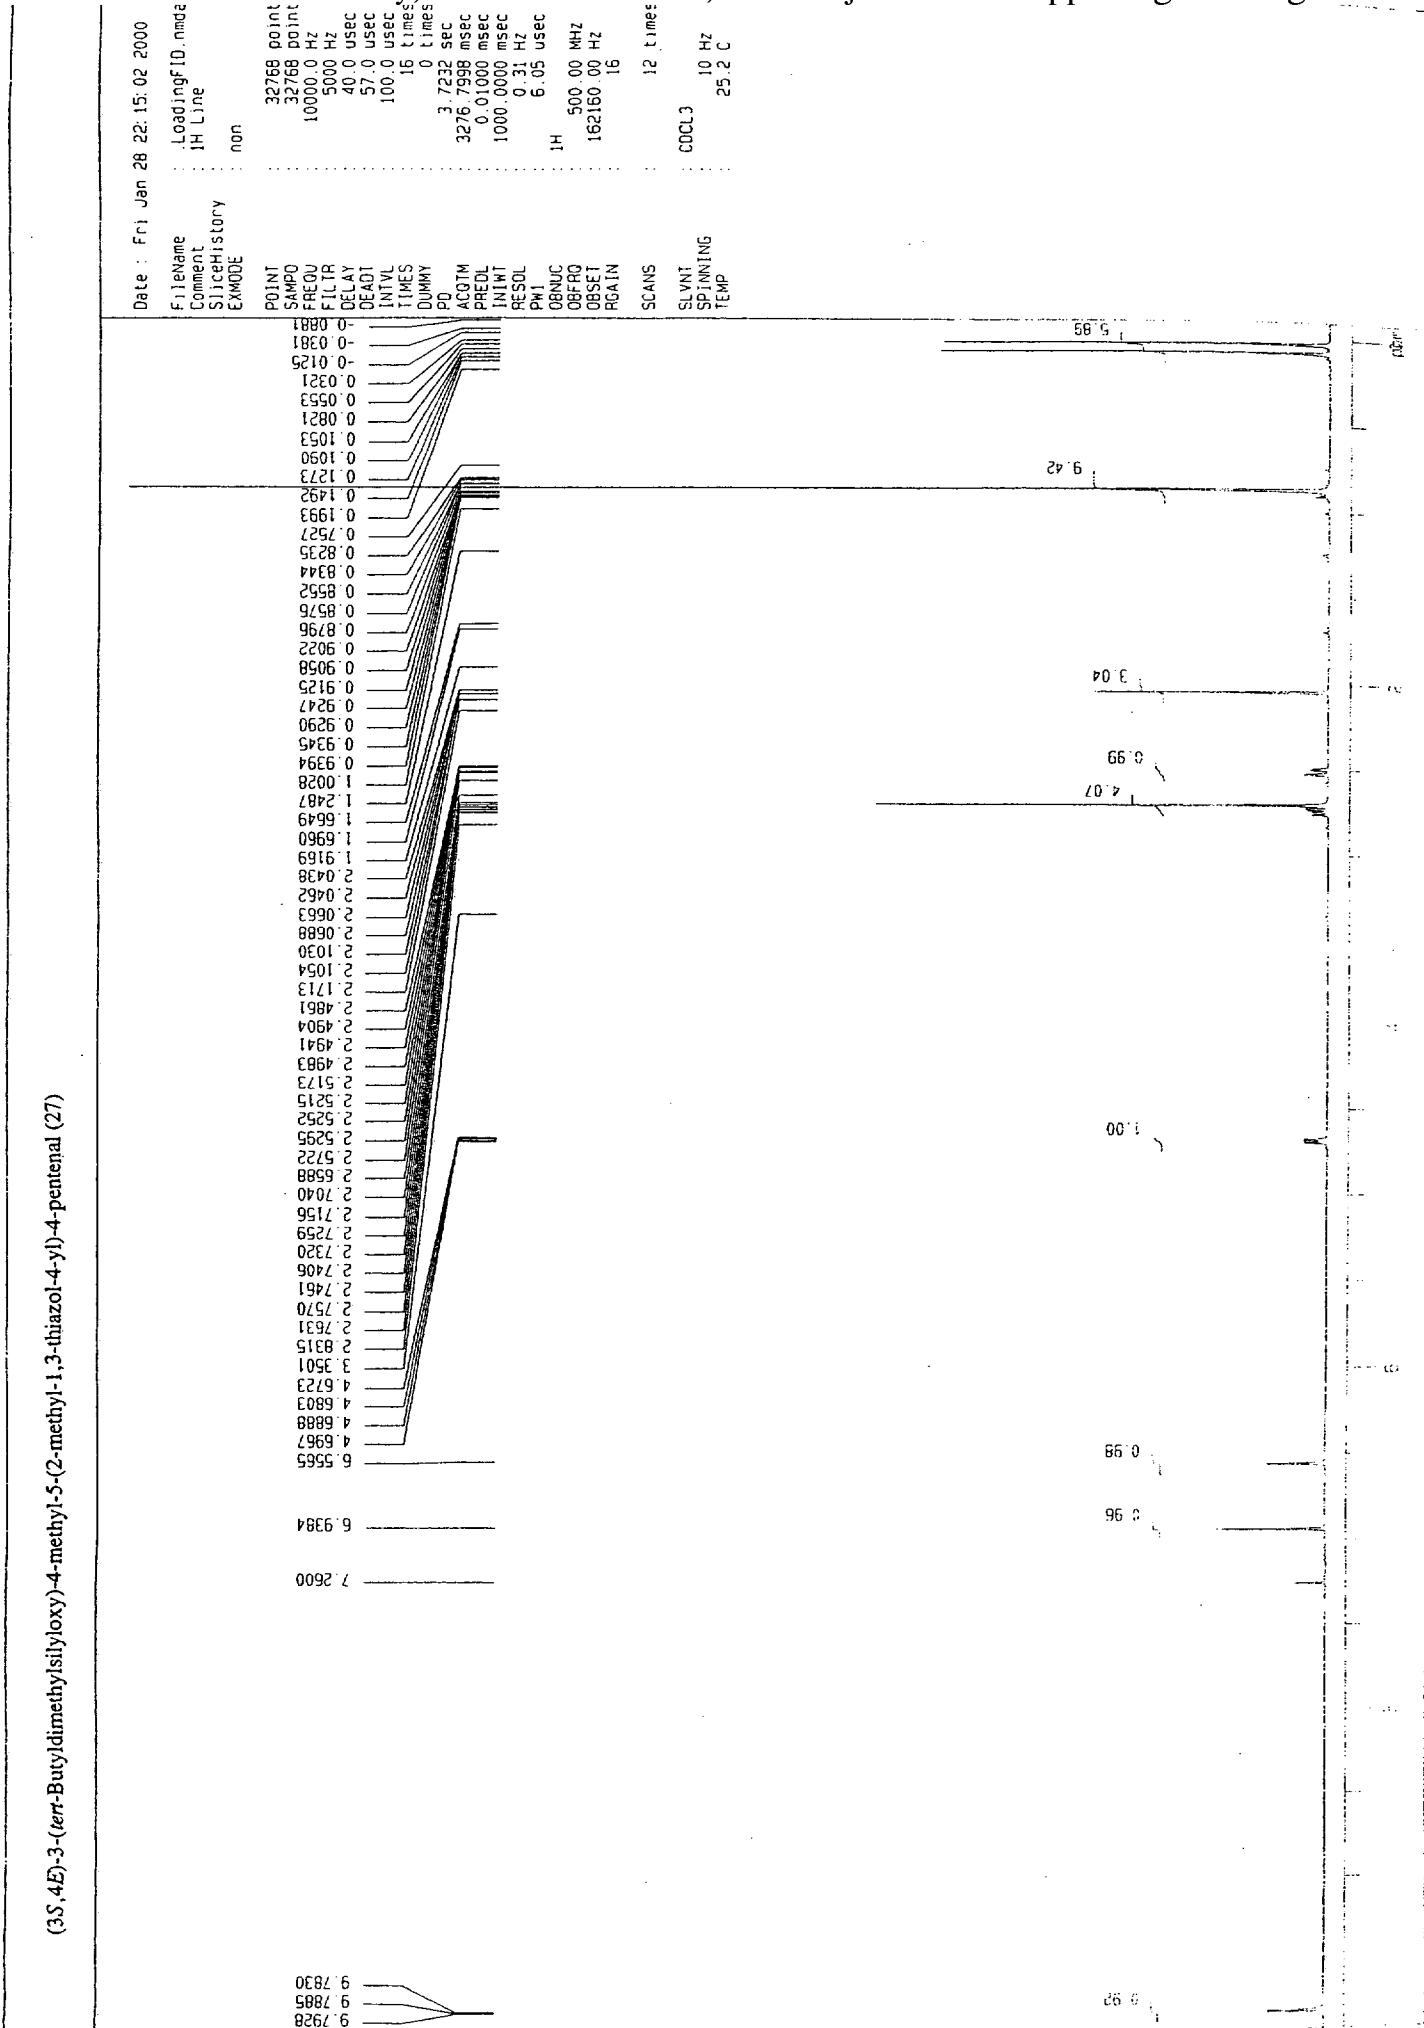

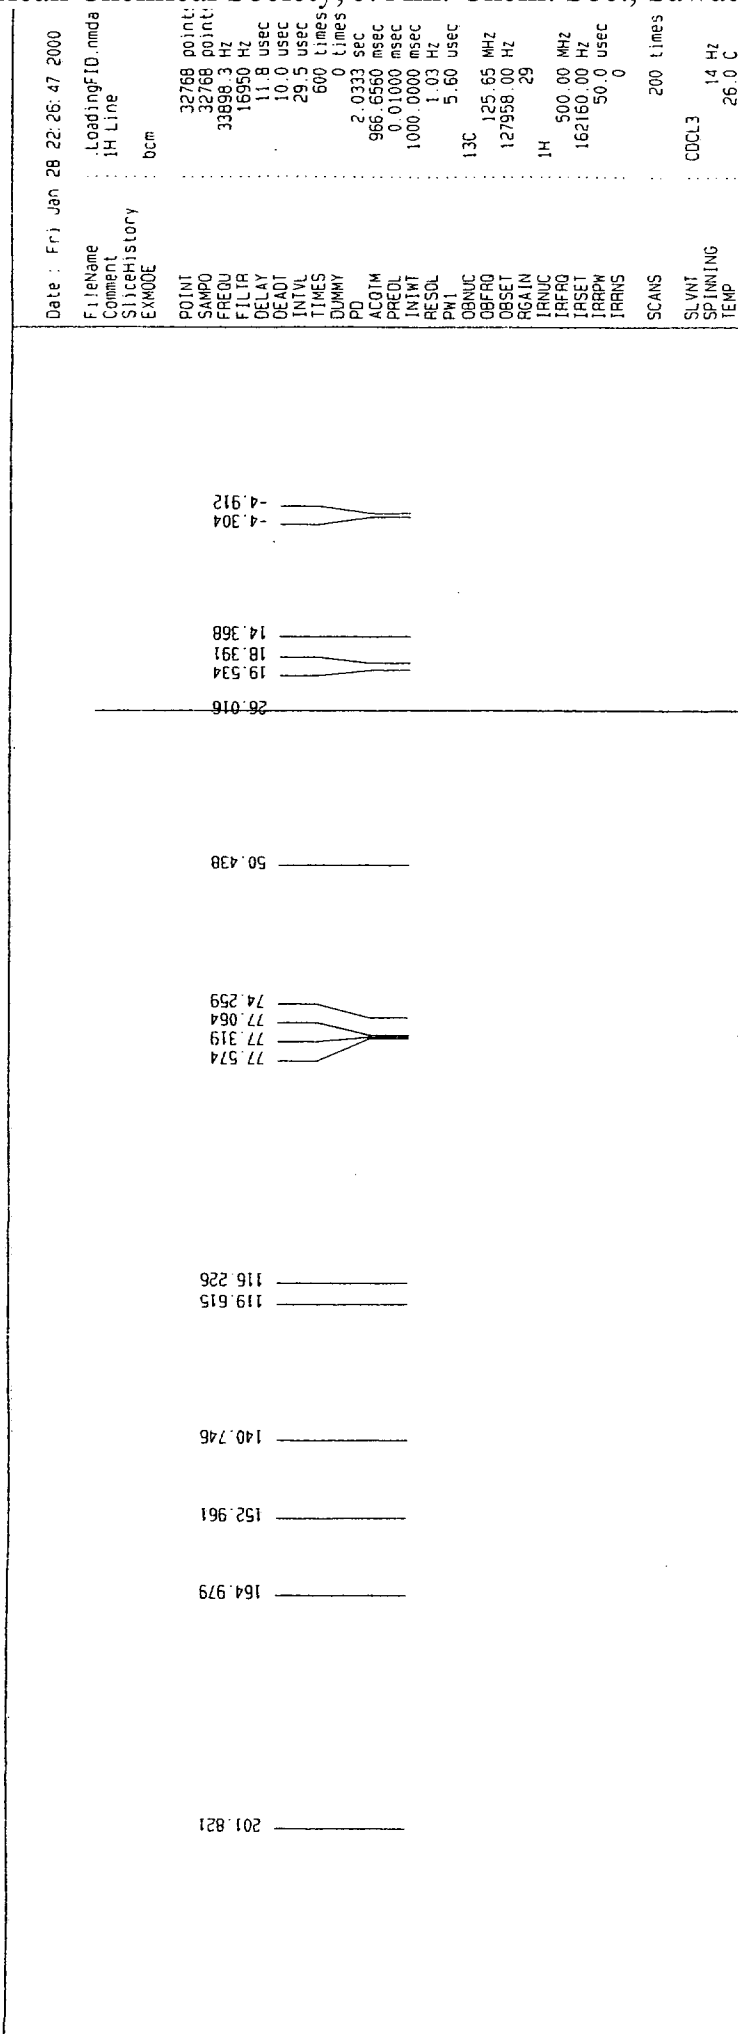

(1E,3S,5Z)-3-(*tert*-Butyldimethylsilyloxy)-6-iodo-2-methyl-1-(2-methyl-1,3-thiazol-4-yl)-1,5-heptadiene  
(28)

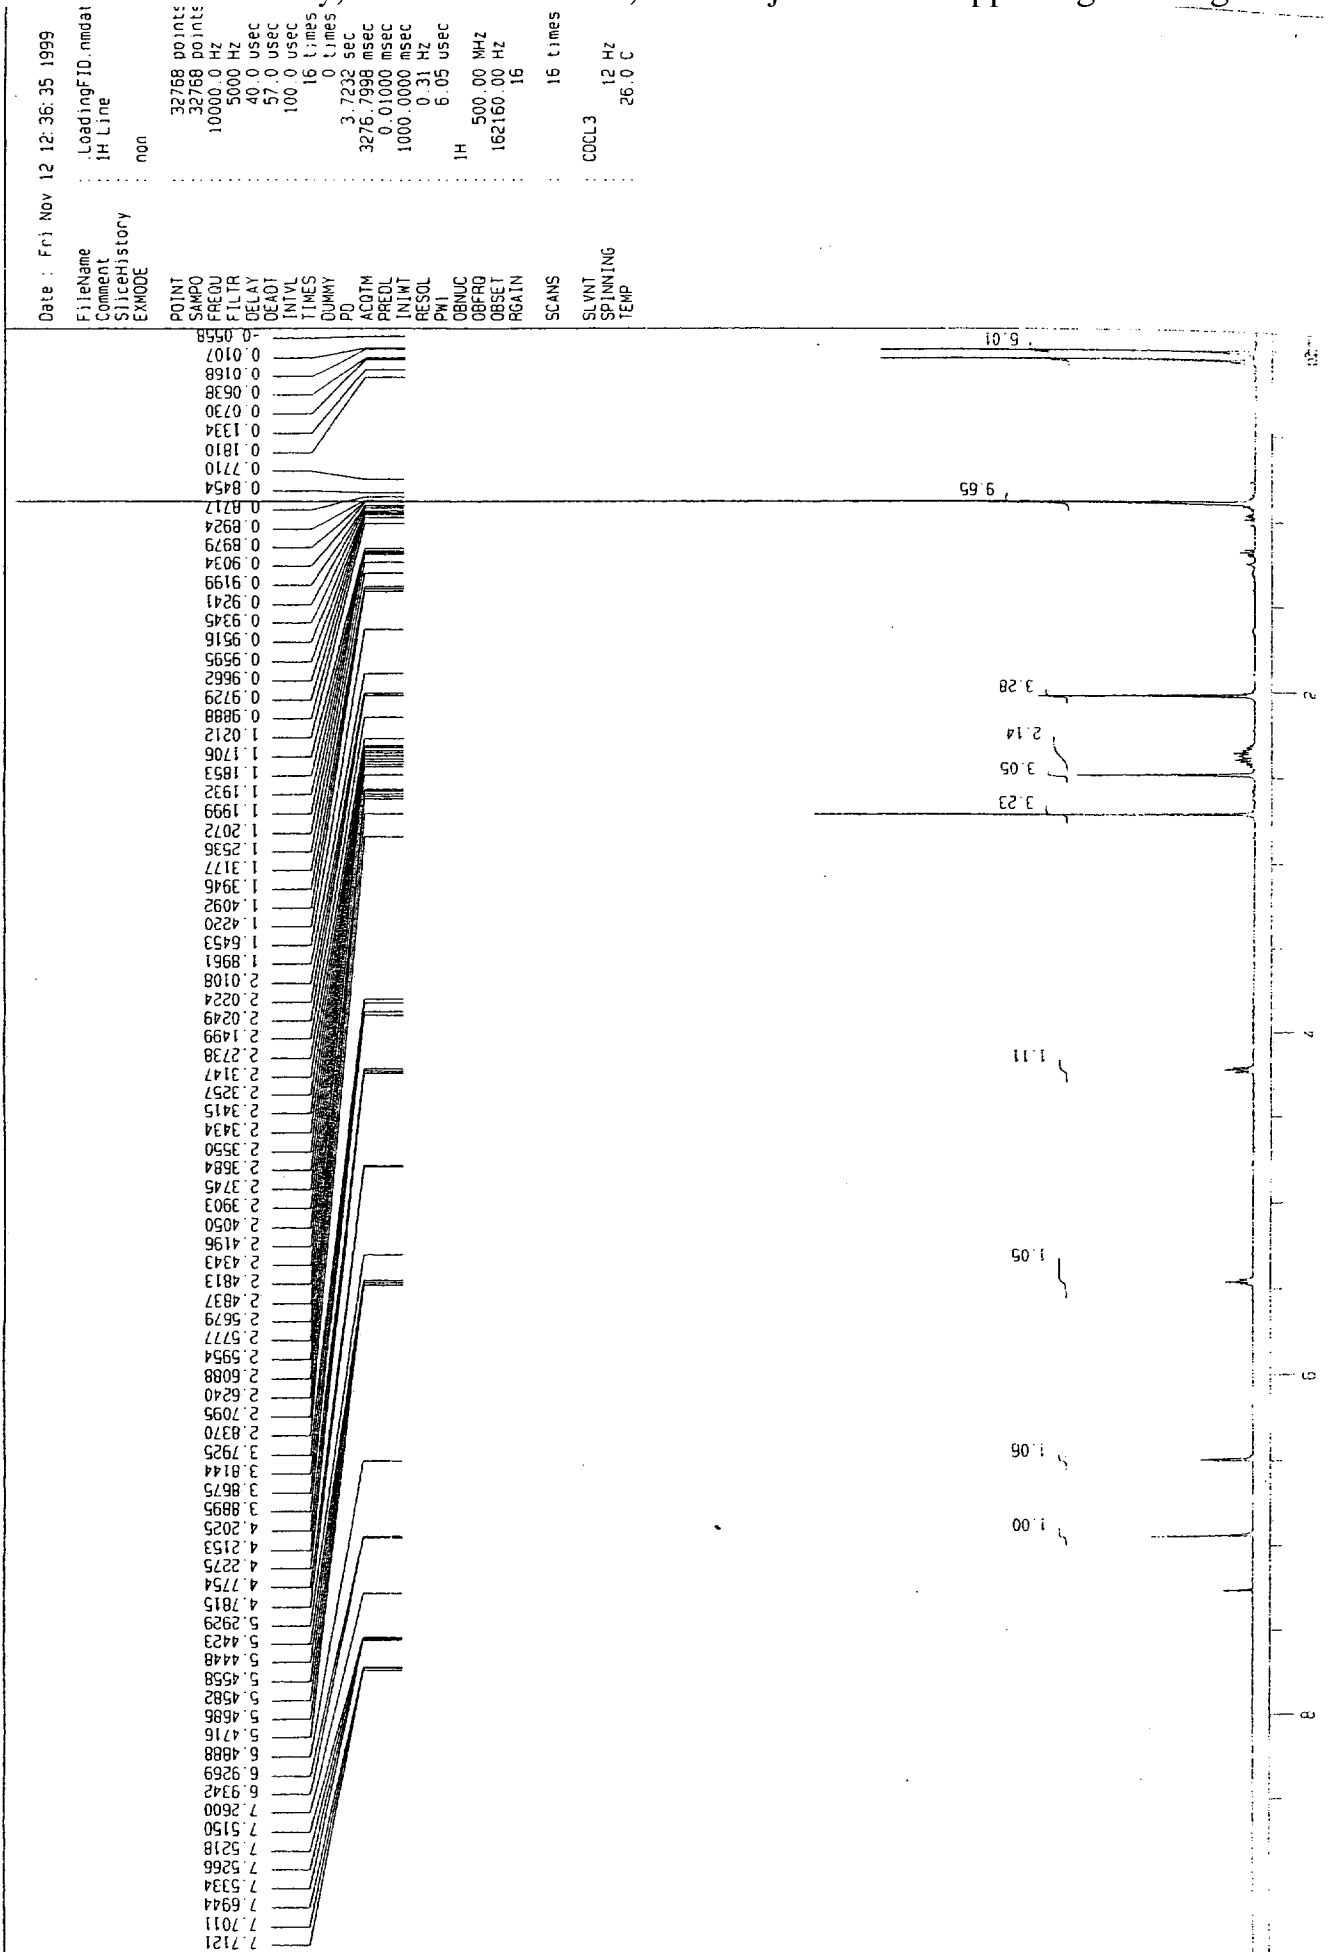

(1E,3S,5Z)-3-(*tert*-Butyldimethylsilyloxy)-6-iodo-2-methyl-1-(2-methyl-1,3-thiazol-4-yl)-1,5-heptadiene  
(28)

Date : Fri Nov 12 12:57:27 1999  
 FileName : .LoadingFID.rmd  
 Comment : 1H Line  
 SliceHistory : bcm  
 EXMODE :  
 POINT : 32768 00in  
 SAMPO : 32768 00in  
 FREQ : 33898.3 Hz  
 FLTR : 16950 Hz  
 DELAY : 11.8 usec  
 DEAT : 10.0 usec  
 INTVL : 29.5 usec  
 TIMES : 600 times  
 DUMMY : 0 times  
 PU : 2.0333 sec  
 ACQTM : 966.6560 msec  
 PRELO : 0.01000 msec  
 INIWT : 1000.0000 msec  
 RESOL : 1.03 Hz  
 PUL : 5.60 usec  
 13C : 125.65 MHz  
 OBFQ : 127958.00 Hz  
 OBSE : 30  
 RGAIN : 1H  
 IRNUC : 500.00 MHz  
 IRFQ : 162160.00 Hz  
 IRPW : 50.0 usec  
 IRMS : 0  
 SCANS : 400 times  
 SLVNT : COCL3  
 SPTING : 12 Hz  
 TEMP : 26.4 C

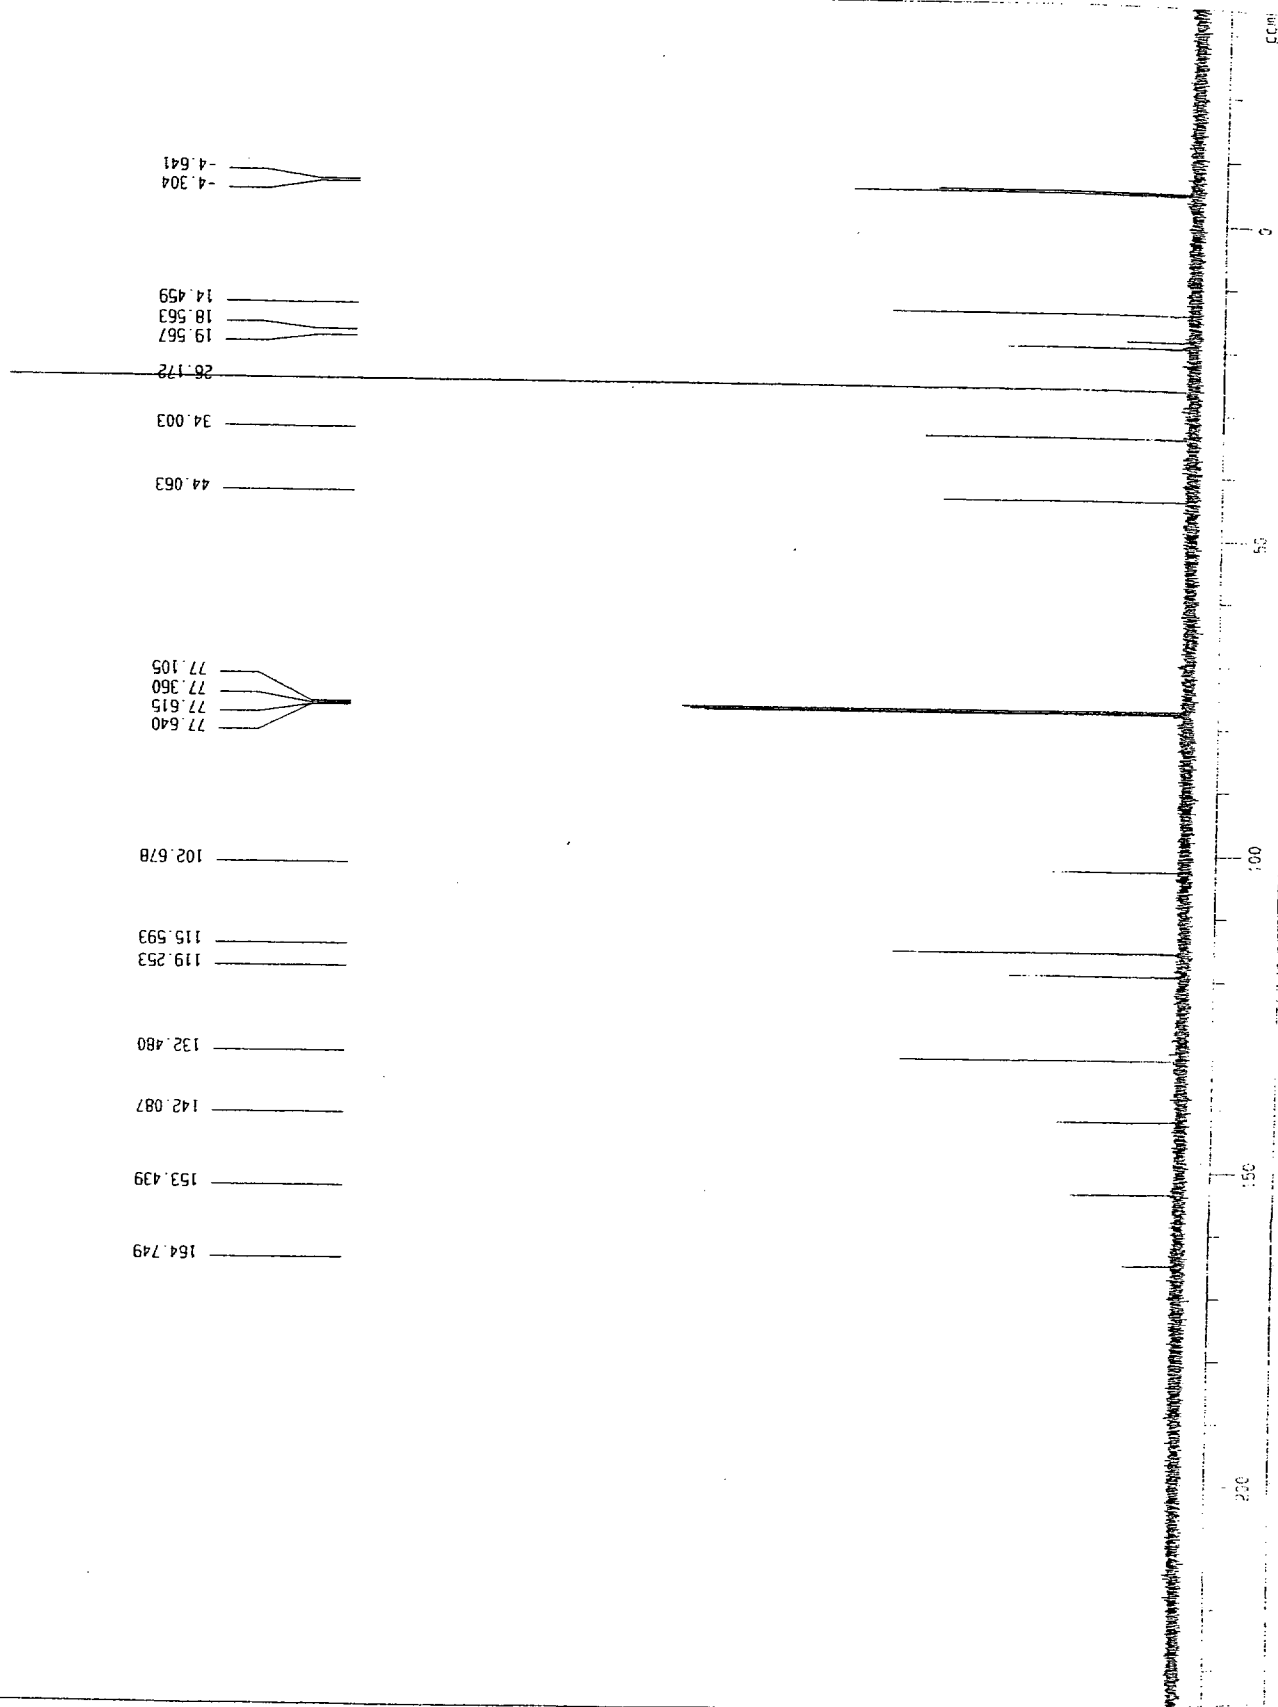

(1E,3S,5Z)-3-Hydroxy-6-iodo-2-methyl-1-(2-methyl-1,3-thiazol-4-yl)-1,5-heptadiene (29)

Date : Sat Nov 13 00:23:28 1999  
 FileName : LoadingFID.nmr  
 Comment : 1H Line  
 SliceHistory : non  
 EXMODE :  
 POINT : 32768 pair  
 SAMP0 : 32768 pair  
 FREQ0 : 10000.0 Hz  
 FILTR : 5000 Hz  
 DELAY : 40.0 usec  
 DEADT : 57.0 usec  
 INIYL : 100.0 usec  
 TIMES : 16 time  
 DUMY : 0 time  
 PD : 3.7232 sec  
 ACOTM : 3276.7998 msec  
 PREDL : 0.01000 msec  
 INIYL : 1000.0000 msec  
 RESOL : 0.31 Hz  
 PW1 : 6.05 usec  
 OBNUC : 1H  
 OBFRQ : 500.00 MHz  
 OBSET : 162160.00 Hz  
 RGAIN : 18  
 SCANS : 16 time  
 SLVNT : CDCL3  
 SPINNING : 12 Hz  
 TEMP : 25.0 C

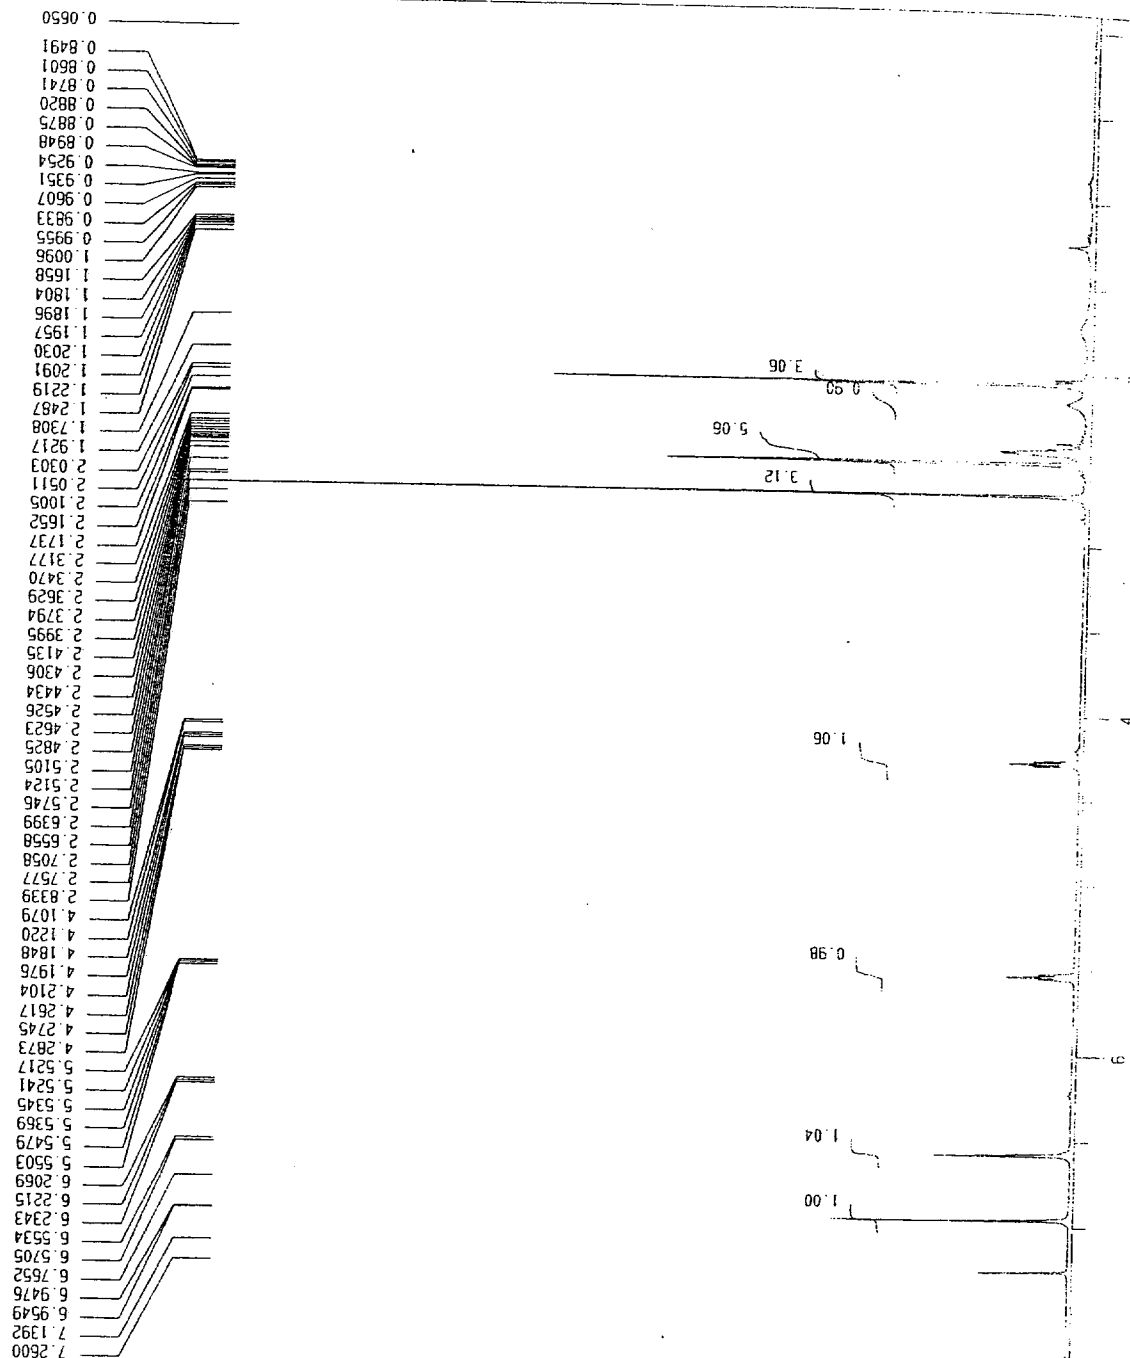

## (1E,3S,5Z)-3-Hydroxy-6-iodo-2-methyl-1-(2-methyl-1,3-thiazol-4-yl)-1,5-heptadiene (29)

Date : Sat Nov 13 00:52:18 1999  
FileName : .LoadingFID.nmrd  
Comment : 1H Line  
SliceHistory :  
EXMODE : bcm  
POINT : 32768 point  
SAMP : 32768 point  
FREQ : 33898.3 Hz  
FILT : 16950 Hz  
DELT : 11.8 usec  
DEAD : 10.0 usec  
INTE : 29.5 usec  
TIMES : 600 times  
DUMMY : 0 times  
PD : 2.0333 sec  
ACQIM : 966.6560 msec  
PREOL : 0.01000 msec  
INTEI : 1000.0000 msec  
RESOL : 1.03 Hz  
PMT : 5.60 usec  
13C : 125.65 MHz  
127958.00 Hz  
30  
1H : 500.00 MHz  
162160.00 Hz  
50.0 usec  
0  
SCANS : 560 times  
SLVNT : CDCl3  
SPINNING : 12 Hz  
TEMP : 26.6 C

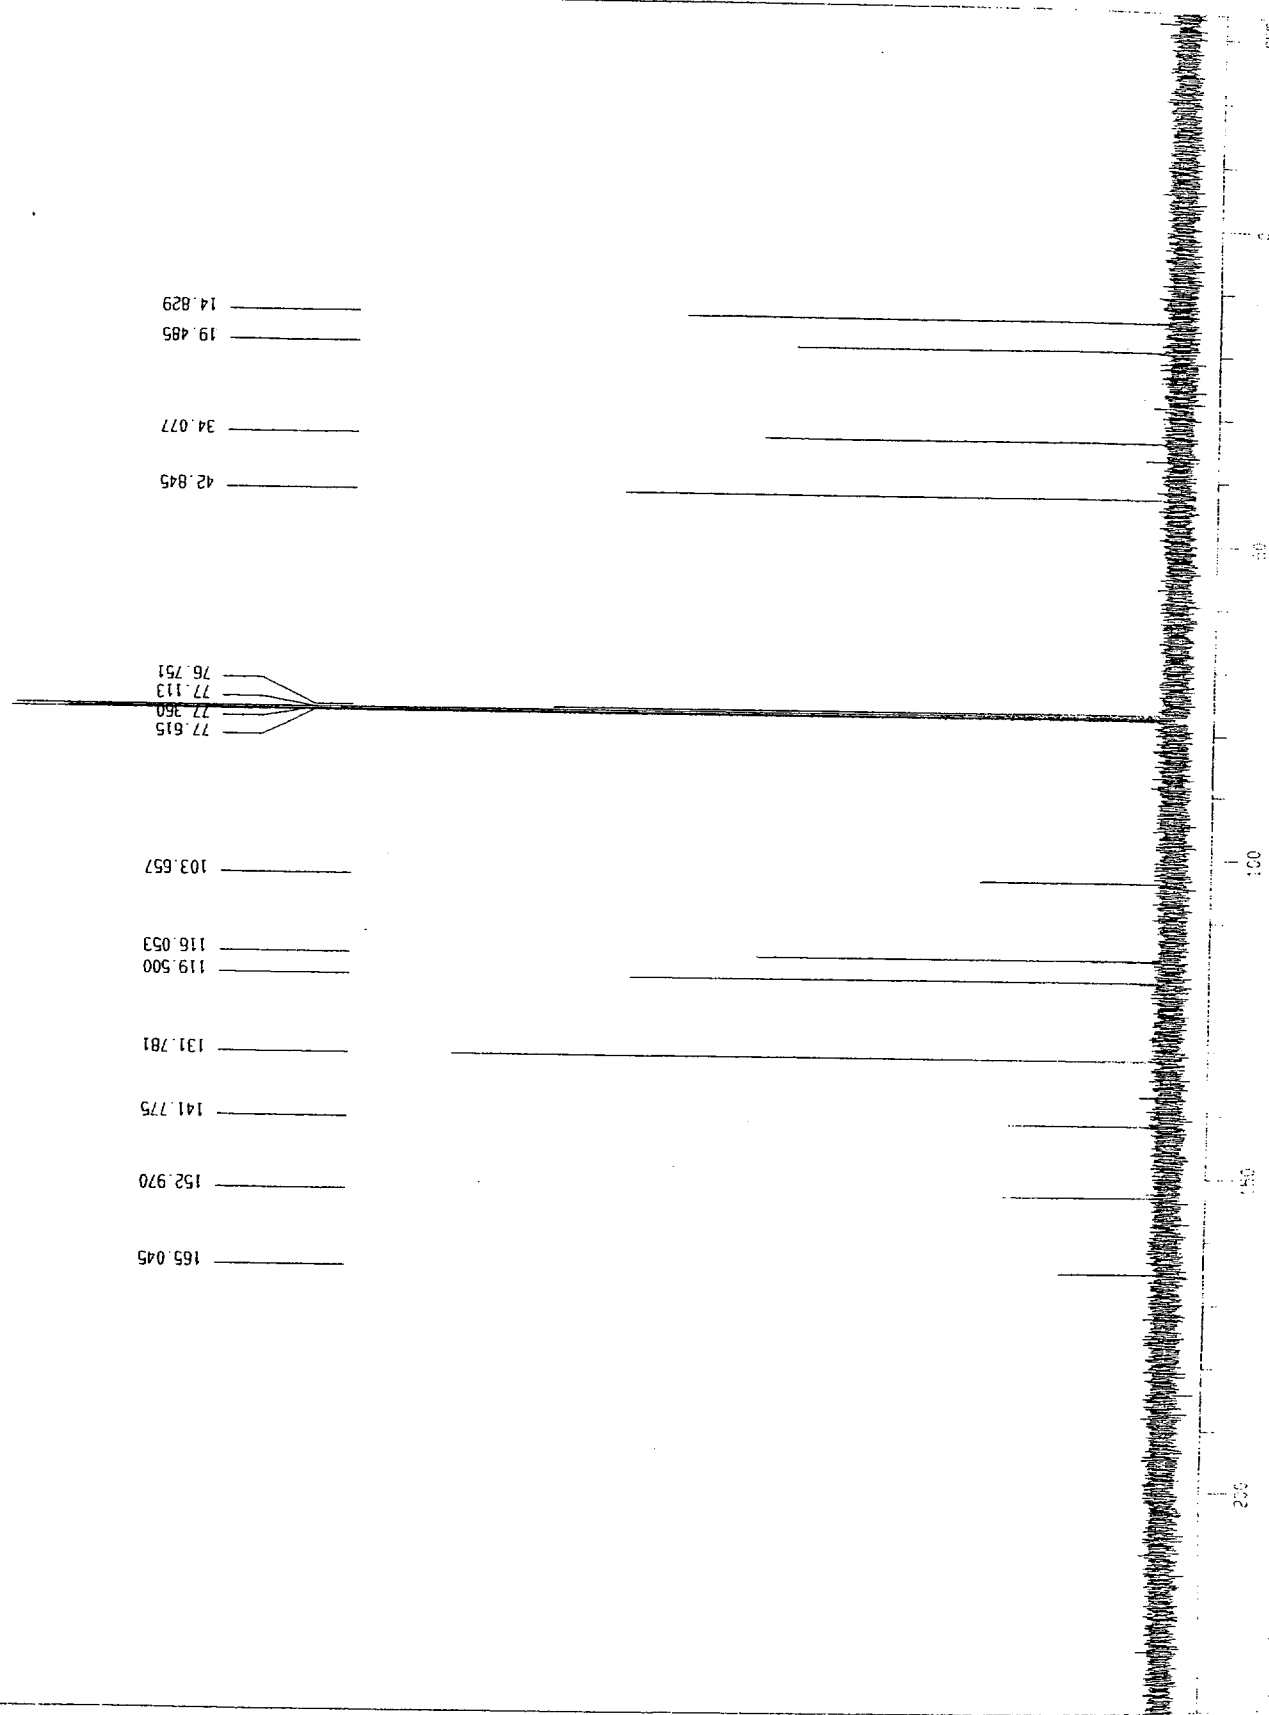

(1E,3S,5Z)-6-Iodo-2-methyl-1-(2-methyl-1,3-thiazol-4-yl)-1,5-heptadiene-3-yl acetate (Fragment B)

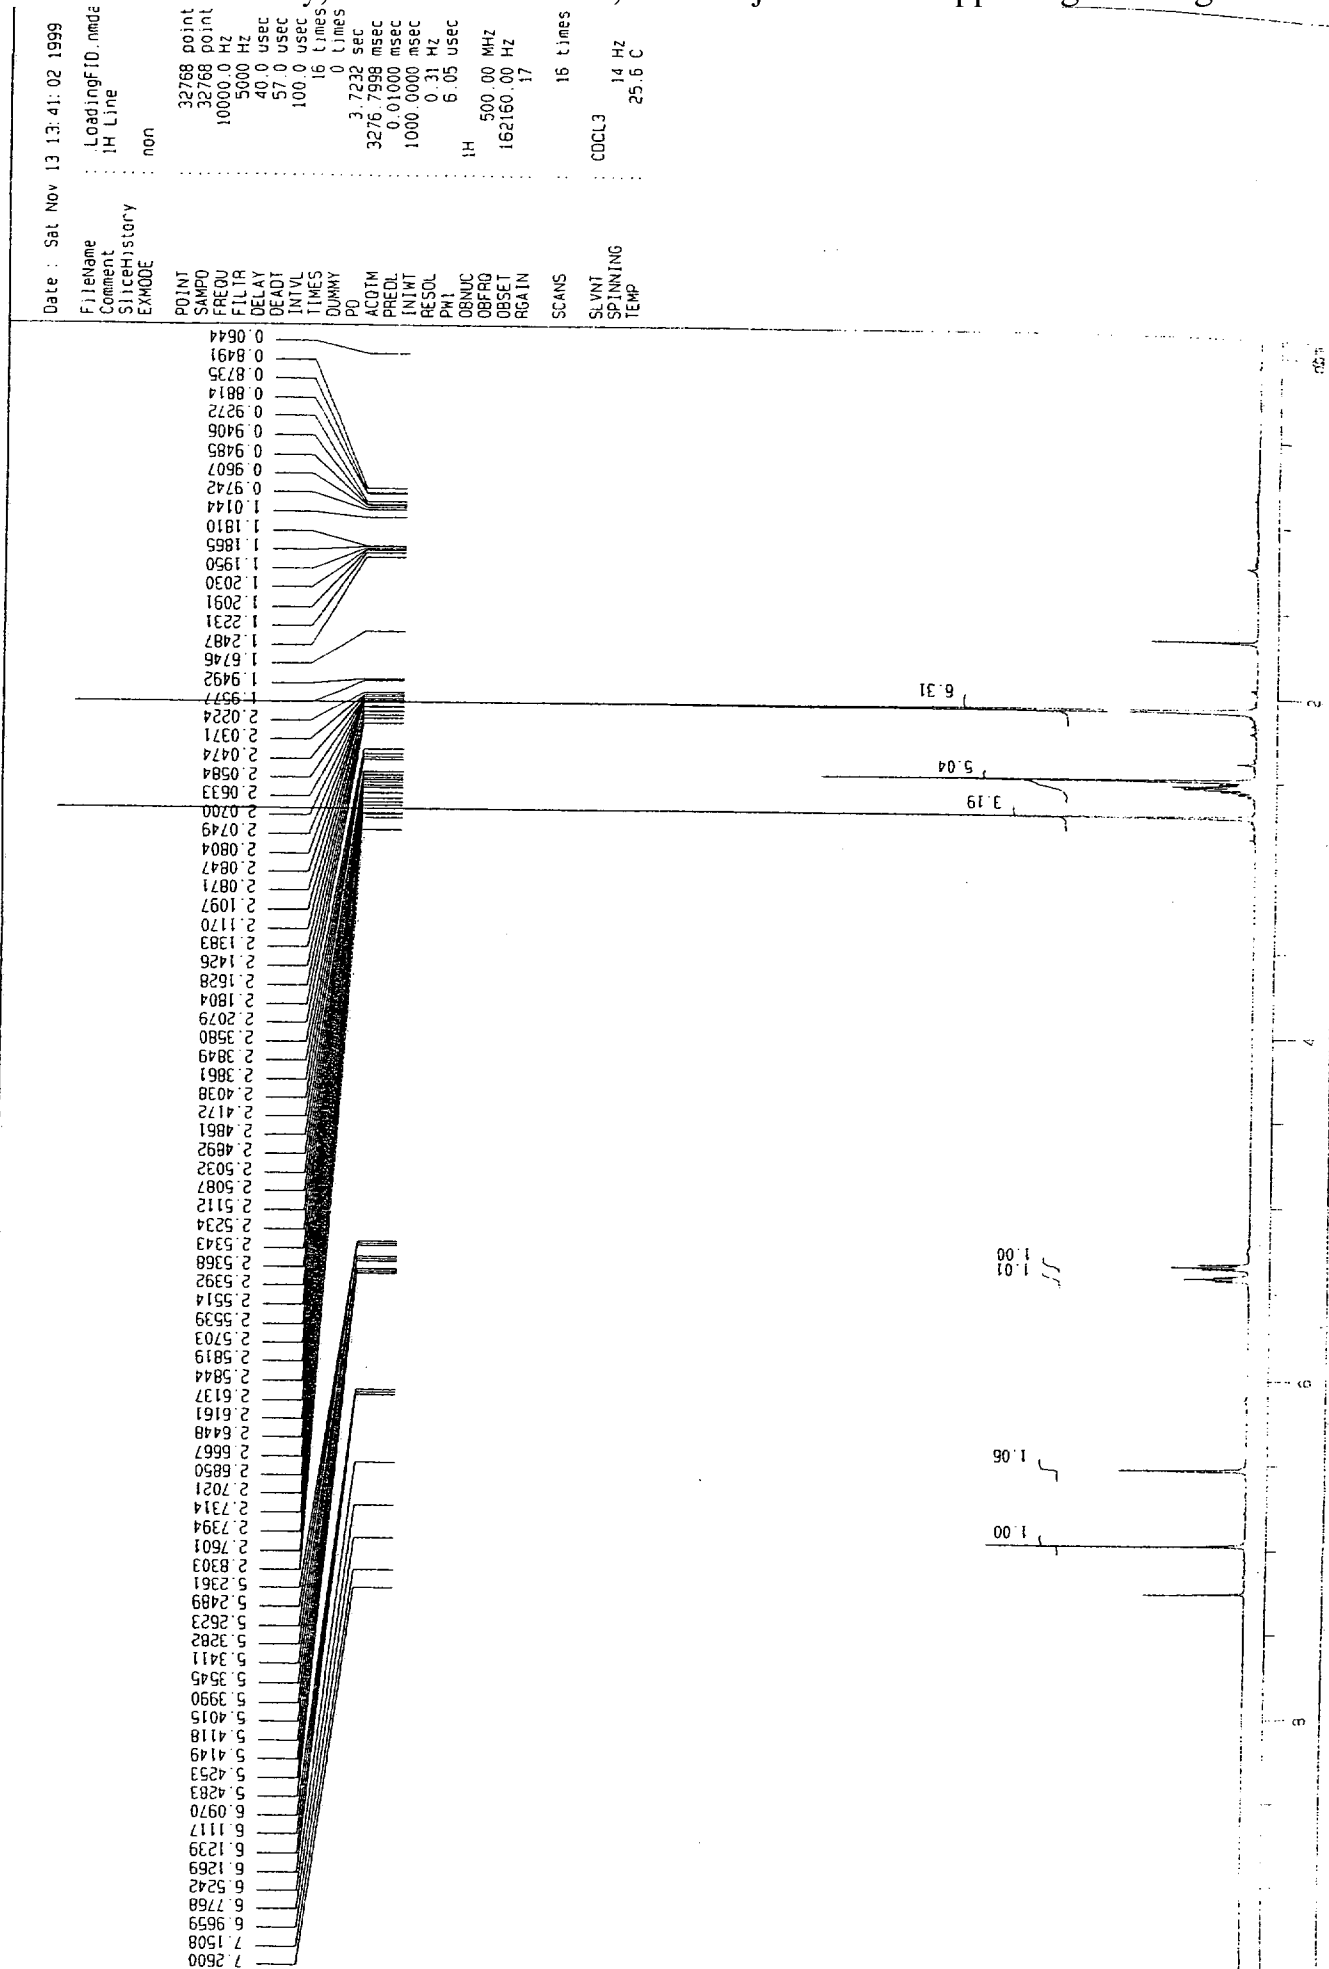

Supplement: Supplementary file 1 [file 5718867]
